# Supplementary material for: The influence of climatic factors on the development of hemorrhagic fever with renal syndrome and leptospirosis during the peak season in Korea: an ecologic study
Source: BMC Infect Dis. 2017 Jun 7;17:406. doi: 10.1186/s12879-017-2506-6 (PMC5463320; doi:10.1186/s12879-017-2506-6)
Supplement: Additional file 1: — Monthly sum of HFRS and leptospirosis cases with climate variables in Korea. (XLSX 658 kb) [file 12879_2017_2506_MOESM1_ESM.xlsx]

## Sheet: Data_set_HFRS_Lepto
Sido	yr	mon	mon1	season	HFRS	leptospirosis	ta	t_max	t_min	hm	hm_min	rainfall	sunshine	solarr radiation
P	2001	1	jan	4	0	0	2.67245	6.20968	-0.509677	53.1868	36.5806	5.49091	4.67097	8.13548
P	2001	2	feb	4	0	0	5.76443	9.81071	2.21071	48.5446	32.5	6.6625	4.79643	10.1179
P	2001	3	mar	1	0	0	9.54664	13.8161	5.77742	52.004	31.6452	0.61	5.9129	14.1797
P	2001	4	apr	1	0	0	15.0131	19.5267	11.15	59.4542	38.5	7.06667	7.11667	17.9723
P	2001	5	may	1	0	0	19.12	22.7548	16.3161	72.4946	54.6129	5.25455	6.00968	17.2503
P	2001	6	jun	2	0	0	21.6897	24.8867	19.26	82.4153	67.6667	21.1462	5.18	15.5757
P	2001	7	jul	2	0	0	26.2114	29.1806	23.6194	86.9785	74.2258	16.9688	6.11613	17.0745
P	2001	8	aug	2	0	0	27.3769	30.7	24.5258	77.9946	64.4194	9.64667	6.16452	15.1726
P	2001	9	sep	3	0	0	22.7815	26.5367	19.95	73.3792	57.8	5.72308	6.00333	13.3983
P	2001	10	oct	3	0	0	18.4855	22.4226	15.5839	71.457	55.1613	13.1091	5.09677	10.491
P	2001	11	nov	3	3	0	11.4653	16.0467	7.78333	51.5278	36.3333	3.225	5.8	11.0717
P	2001	12	dec	4	0	0	4.83642	8.97097	1.60968	44.3804	29.4516	4.1	5.01613	9.30323
P	2002	1	jan	4	0	0	4.87191	8.5871	1.52903	54.8091	39.0968	8.48	4.80645	10.8571
P	2002	2	feb	4	0	0	6.58988	11.5607	2.97143	43.8542	27.4643	2.05	5.95	14.3507
P	2002	3	mar	1	0	0	10.5887	15.1968	6.8871	56.4879	36.2258	13.0111	5.8871	15.119
P	2002	4	apr	1	0	0	14.3036	18.14	10.8267	64.6139	48.3667	34.9818	5.21	15.875
P	2002	5	may	1	1	0	16.9991	20.7484	14.0097	73.7433	55.6452	8.75714	5.21935	16.9929
P	2002	6	jun	2	0	0	20.8714	24.7233	17.85	72.2153	52.5667	6.33333	6.98	20.2207
P	2002	7	jul	2	1	0	23.9923	27.0161	21.8516	84.797	70.5161	19.0375	4.83871	16.4997
P	2002	8	aug	2	0	0	24.1691	26.9	22.1839	84.4462	73.3226	38.6833	4.10968	13.291
P	2002	9	sep	3	0	0	21.6963	25.6267	18.82	71.4111	53.1333	12.3625	6.34	16.181
P	2002	10	oct	3	2	1	16.427	20.7935	12.9226	62.1653	43.6452	9.68	6.27742	13.2919
P	2002	11	nov	3	3	0	8.75986	13.2833	4.87	46.1819	28.6	1.86667	6.09333	11.6567
P	2002	12	dec	4	1	0	6.46935	10.3581	3.2871	52.4516	38.0645	5.32	4.94516	9.13194
P	2003	1	jan	4	0	0	2.4953	6.80323	-1.28387	44.0981	26.9032	3.32857	5.60323	10.7897
P	2003	2	feb	4	0	0	6.26801	10.6536	2.81786	52.9494	34.0357	6.45	4.83929	11.8529
P	2003	3	mar	1	0	0	8.61962	12.9323	5.09677	60.2876	42.1613	8.61111	4.92581	12.31
P	2003	4	apr	1	0	0	13.7608	17.86	10.84	68.9389	49.7	16.5714	5.00667	13.8897
P	2003	5	may	1	0	0	16.9265	20.6032	13.8839	72.0134	56.3548	34.875	4.33548	15.6881
P	2003	6	jun	2	3	0	20.7365	23.99	18.2667	77.8222	63.3667	35.5	4.94	15.32
P	2003	7	jul	2	0	0	21.3011	23.8452	19.4258	86.4046	76.5161	27.4042	2.23871	10.0297
P	2003	8	aug	2	0	0	24.1461	27.1097	21.8774	81.3253	70.1935	16.3529	4.12581	12.8755
P	2003	9	sep	3	0	0	22.4706	26.3467	19.7033	73.9208	59.2667	13.3583	5.16667	12.96
P	2003	10	oct	3	1	0	16.5788	21.571	12.829	55.0215	37.5806	0.5	7.58387	13.1558
P	2003	11	nov	3	0	0	13.0944	17.03	10.1233	66.85	50.5667	3.59375	4.66667	7.372
P	2003	12	dec	4	0	1	5.23105	9.40645	1.66452	43.0645	28.2581	2.88	7.21613	8.90194
P	2004	1	jan	4	0	0	2.87312	7.55484	-0.677419	41.6035	26.129	0.35	7.20968	9.72226
P	2004	2	feb	4	0	0	6.59727	11.2172	2.65172	43.6379	25	15.5	8.06207	12.8021
P	2004	3	mar	1	0	0	8.8043	13.4419	4.91613	50.6438	32.8065	4.37273	7.3129	15.0848
P	2004	4	apr	1	0	0	13.9831	18.7833	10.29	57.3542	36.1667	17.9167	7.61667	17.7497
P	2004	5	may	1	0	0	17.2331	20.4839	14.6226	72.1089	54.8387	12.3882	5.4	15.0529
P	2004	6	jun	2	0	0	20.9147	24.75	17.7467	67.1056	50.9333	18.91	6.48333	17.647
P	2004	7	jul	2	0	0	24.163	27.3129	21.6935	79.6116	66.5484	7.64167	6.35806	17.279
P	2004	8	aug	2	1	0	25.2028	28.7677	22.5129	72.4435	57.0323	15.5625	5.70968	15.1771
P	2004	9	sep	3	0	1	21.9929	25.2967	19.7	73.4542	56.9667	12.8444	3.80333	10.7047
P	2004	10	oct	3	0	0	16.7806	21.129	13.4097	58.5336	41.5161	1.85	6.92258	12.109
P	2004	11	nov	3	1	0	12.5053	17.2267	8.68667	56.5389	39.2667	4.57143	7.77	10.983
P	2004	12	dec	4	0	0	7.38185	11.6161	3.83226	46.9651	31.2903	6.525	6.43226	8.79065
P	2005	1	jan	4	0	0	1.99919	6.05806	-1.6129	42.3858	26.1935	1.9625	6.66129	10.2948
P	2005	2	feb	4	0	0	2.50863	6.51786	-1.10714	45.8274	31.4643	3.68	6.03214	11.3686
P	2005	3	mar	1	0	0	7.09422	11.7677	3.08387	51.2258	31.0323	10.9538	7.38387	16.0116
P	2005	4	apr	1	0	0	13.9392	18.1333	10.4867	57.9528	38.9667	14.8625	8.02	19.058
P	2005	5	may	1	1	0	17.0833	21.6645	13.4097	63.3091	45.6452	21	8.43871	22.2065
P	2005	6	jun	2	0	0	21.0079	24.3433	18.3033	76.2042	64.0333	16.1111	6.40333	18.1247
P	2005	7	jul	2	0	0	23.8289	26.7355	21.5548	81.8938	71.3226	19.65	5.07742	15.1587
P	2005	8	aug	2	0	0	25.7422	28.8355	23.3839	75.586	63.5161	14.0533	5.62903	16.529
P	2005	9	sep	3	0	0	22.7385	26.1433	20.4167	75.6514	62.1667	13.5769	4.62667	12.7853
P	2005	10	oct	3	2	0	17.122	21.6613	13.9097	60.6102	45.5484	3.58333	5.94839	12.4374
P	2005	11	nov	3	1	1	11.6213	16.27	8.12667	46.7917	30.5667	7.725	7.66667	11.441
P	2005	12	dec	4	1	0	1.17392	5.63548	-2.64839	37.0094	24.7097	0.6	7.5	10.2971
P	2006	1	jan	4	0	0	3.93723	8.05161	0.83871	45.8065	31.8065	3.48571	5.42903	8.26355
P	2006	2	feb	4	0	0	4.06771	8.46429	0.0964286	48.6696	31.9286	3.63	6.37143	11.6668
P	2006	3	mar	1	0	0	7.99516	12.9935	3.86129	50.3347	32	3.52857	7.40968	16.1003
P	2006	4	apr	1	0	0	12.1276	16.1733	8.73667	63.1625	45.1	13.8583	5.77	15.8867
P	2006	5	may	1	0	0	16.3308	20.3742	13.3839	71.8629	54.5806	18.4	5.49032	17.1368
P	2006	6	jun	2	0	0	20.2454	23.8367	17.4233	75.2528	60.4	13.4923	6.28	19.0363
P	2006	7	jul	2	0	0	22.5612	25.0323	20.4258	84.9422	75.0968	25.7261	3.02903	11.0084
P	2006	8	aug	2	0	0	27.4415	31.1774	24.6484	73.8011	59.7097	7.55556	8.04839	20.9342
P	2006	9	sep	3	1	0	21.275	24.93	18.68	69.1	53.4	11.0667	5.06333	14.307
P	2006	10	oct	3	6	2	19.9633	24.4645	17.0548	65.0766	47.1935	2.62	7.44516	14.9468
P	2006	11	nov	3	3	0	13.0738	16.6267	9.95667	53.0694	36.6333	2.34615	5.44333	9.77733
P	2006	12	dec	4	0	0	6.65672	10.7226	3.17742	46.5403	32.4839	0.9375	6.46452	9.45129
P	2007	1	jan	4	0	0	5.2121	9.34839	2.22903	43.4005	26.5161	0.575	6.06452	10.2194
P	2007	2	feb	4	0	0	7.84524	12.425	4.15714	53.0417	34.5357	14.375	7.03571	13.4239
P	2007	3	mar	1	0	0	9.10806	12.9742	5.83871	55.2258	39.1935	5.80769	5.9871	14.5974
P	2007	4	apr	1	0	0	13.1304	17.1	9.82667	52.9153	34.4333	6.55	7.29	19.599
P	2007	5	may	1	0	0	17.744	21.4903	14.5677	64.6425	44.3871	8.96923	7.98387	22.5368
P	2007	6	jun	2	0	0	20.4449	23.4533	18.08	74.1	61.2667	7.26923	4.91	17.7587
P	2007	7	jul	2	0	0	22.7434	25.1613	20.8516	79.8427	68.7419	16.75	4.10323	15.2223
P	2007	8	aug	2	0	0	26.7106	29.3484	24.629	77.707	65.5484	8.00625	5.81613	17.8087
P	2007	9	sep	3	2	0	22.8437	25.7633	20.7033	75.8486	63.7	10.51	4.00333	12.335
P	2007	10	oct	3	2	3	18.3332	22.229	15.4871	63.6815	48.8387	13.2222	5.64516	13.019
P	2007	11	nov	3	5	6	11.9232	15.7533	8.61667	47.1083	33.4	0	7.31667	12.0313
P	2007	12	dec	4	1	0	7.2961	10.6516	4.48387	50.6532	35.7419	5.11111	5.90323	9.24613
P	2008	1	jan	4	0	0	4.70376	8.17742	1.80968	53.4476	37.0645	3.57	5.67419	9.67677
P	2008	2	feb	4	1	0	3.81509	8.11379	-3.06268e-17	37.7083	23.7241	4.775	8.1931	15.4114
P	2008	3	mar	1	0	0	9.50484	13.5581	6.3129	59.8548	39.7097	7.37	6.78065	16.6468
P	2008	4	apr	1	1	0	13.8604	17.2967	10.8767	62.8389	45.7	8.94444	7.38667	20.148
P	2008	5	may	1	0	0	17.3677	20.9484	14.4968	69.0255	51	19.13	7.29355	20.5987
P	2008	6	jun	2	0	0	19.6786	22.2833	17.3967	75.9681	62.9667	10.9706	4.38	15.346
P	2008	7	jul	2	0	0	25.554	28.1032	23.3774	82.3118	70.1613	6.69375	5.76129	19.0032
P	2008	8	aug	2	0	0	25.0063	27.9097	22.6129	75.3548	61.4839	36.85	6.75484	18.7119
P	2008	9	sep	3	0	0	22.9264	25.87	20.64	71.9028	58.1	1.70769	5.33667	13.9703
P	2008	10	oct	3	3	3	19.0823	22.7419	16.2968	61.9073	43.2903	13.05	6.6129	12.8423
P	2008	11	nov	3	2	1	11.6301	15.3967	8.71	56.5042	39.5333	3.14286	6.17667	10.014
P	2008	12	dec	4	1	0	6.6211	10.4161	3.05484	48.0542	33	2.375	6.60645	9.82032
P	2009	1	jan	4	0	0	3.45806	7.9129	-0.0451613	44.4323	28.0323	2.42857	6.3	10.2642
P	2009	2	feb	4	0	0	8.28571	12.1643	5.01071	58.7536	39.25	6.58333	5.36429	10.8964
P	2009	3	mar	1	2	0	9.75484	13.7774	6.1	55.1355	35.2581	9.0875	6.42581	15.7294
P	2009	4	apr	1	0	0	14.33	19.12	10.74	57.7733	34	10.6111	7.82667	20.1997
P	2009	5	may	1	0	0	18.5516	22.8258	15.2774	65.3032	43.4194	17.34	7.20968	21.3181
P	2009	6	jun	2	0	0	21.3667	25.0767	18.71	74.31	55.6667	18.79	6.22	20.8957
P	2009	7	jul	2	0	0	23.3387	26.2839	21.1097	83.6452	70.6129	40.2773	2.71613	13.8477
P	2009	8	aug	2	0	0	24.9742	28.1032	22.8613	73.5742	59.2581	6.52308	4.37742	16.2971
P	2009	9	sep	3	0	0	22.6967	26.4233	20.1267	67.87	51.6333	2.22222	5.22667	15.489
P	2009	10	oct	3	0	0	18.7774	23.3871	15.429	54.8	34.4194	12.4	7.39677	14.5242
P	2009	11	nov	3	2	1	11.0667	15.18	7.74333	57.3733	40.6667	9.85714	5.04667	8.83133
P	2009	12	dec	4	0	0	5.39032	9.77419	1.79032	44.2677	29.2581	1.87143	6.73226	9.06387
C	2001	1	jan	4	0	0	-4.4244	0.375	-9.21129	63.8155	43.4355	3.78345	4.54677	8.04484
C	2001	2	feb	4	0	0	-0.994159	4.32143	-5.825	63.0331	42.0982	5.20536	5.37143	10.4857
C	2001	3	mar	1	0	0	4.08253	10.5274	-1.9371	52.6549	29.4274	1.20641	7.82661	14.5932
C	2001	4	apr	1	0	0	12.4583	20.0108	4.56	45.8816	23.6417	2.68899	9.455	19.19
C	2001	5	may	1	0	0	18.3712	24.7089	12.0427	53.5588	32.0887	1.79	9.40887	20.1081
C	2001	6	jun	2	0	0	21.9209	26.6742	17.3567	64.6809	47.575	20.5508	7.05333	14.552
C	2001	7	jul	2	1	0	25.3072	29.8492	21.5226	71.0467	53.6613	11.3747	7.62016	15.9423
C	2001	8	aug	2	3	0	24.8937	30.2694	20.2581	65.7584	45.2016	10.0002	8.90484	16.9945
C	2001	9	sep	3	0	0	19.758	26.1992	13.735	61.9896	37.9917	3.73036	8.43	16.247
C	2001	10	oct	3	2	1	13.9997	20.046	9.0629	71.125	45.8306	8.88056	5.87581	10.6684
C	2001	11	nov	3	4	0	4.26955	11.0917	-1.35167	65.6819	36.725	0.929762	5.89917	9.14133
C	2001	12	dec	4	1	0	-2.41099	3.47258	-7.78145	62.1122	36.0323	1.60819	6.15323	8.2671
C	2002	1	jan	4	0	0	-0.918784	3.64274	-5.40323	65.8468	46.1371	3.93802	5.12984	7.70097
C	2002	2	feb	4	0	0	0.00398065	6.32054	-5.65	59.0971	33.3304	1.3975	6.62054	11.2357
C	2002	3	mar	1	0	0	6.64291	13.4129	0.00241935	53.8989	27.0726	3.16312	7.32339	14.1339
C	2002	4	apr	1	0	0	12.7922	19.4392	5.93833	51.8844	28.4917	20.0132	7.915	17.5477
C	2002	5	may	1	1	0	16.782	22.5129	11.2185	61.9385	38.2581	10.252	7.59355	17.8584
C	2002	6	jun	2	1	0	20.795	26.3542	15.0875	63.8799	39.9917	7.26919	8.35	19.4343
C	2002	7	jul	2	0	1	24.398	28.4298	20.8331	68.5464	52.629	11.9189	6.11935	15.4319
C	2002	8	aug	2	0	0	23.3494	26.7323	20.7242	79.2675	65.0887	24.9693	3.57419	10.2329
C	2002	9	sep	3	1	2	19.0476	24.4842	14.6958	73.6872	51.0667	8.32333	6.35667	14.4847
C	2002	10	oct	3	4	0	10.7102	16.8847	5.46613	69.4479	41.4355	4.01664	6.02984	11.9929
C	2002	11	nov	3	3	1	2.61816	8.16833	-2.75917	61.9031	38.1083	1.53688	5.76333	9.132
C	2002	12	dec	4	0	0	0.121841	5.18629	-4.14032	68.0064	44.871	3.78238	5.0379	7.63968
C	2003	1	jan	4	2	0	-4.21549	0.937903	-9.13226	65.8925	43.5968	1.58472	5.51452	8.6629
C	2003	2	feb	4	0	0	0.799963	5.84554	-3.67054	65.9587	43.5268	5.98333	5.53214	10.2921
C	2003	3	mar	1	0	0	5.11683	10.4355	-0.241129	61.125	37.3548	3.65633	6.15968	13.2448
C	2003	4	apr	1	0	0	11.9268	17.695	6.23167	59.4562	37.5	15.6675	6.4425	15.5223
C	2003	5	may	1	2	0	17.7268	23.9742	11.5605	61.3619	36.7581	15.1863	8.07903	19.4058
C	2003	6	jun	2	2	0	20.5902	25.1875	16.43	69.3361	49.2167	14.4386	5.9475	15.088
C	2003	7	jul	2	0	0	22.6751	26.5266	19.2726	74.5165	59.2097	22.2362	4.78145	12.2032
C	2003	8	aug	2	1	1	23.4092	27.2081	20.4065	76.2628	59.879	14.5699	4.28145	11.5965
C	2003	9	sep	3	1	0	19.9767	24.8292	16.1542	74.1861	53.8667	21.1512	4.91833	12.1503
C	2003	10	oct	3	3	0	11.7017	19.0629	5.54113	64.4136	34.4839	4.25	7.40403	13.6348
C	2003	11	nov	3	2	0	8.16674	13.8025	2.95417	69.3122	47.0583	3.45401	4.33083	7.65567
C	2003	12	dec	4	2	0	-0.175974	4.6871	-4.80565	64.791	41.5887	2.39917	5.43468	7.4771
C	2004	1	jan	4	2	0	-3.04913	2.72258	-8.12903	64.8928	40.0726	1.35607	6.32903	9.62484
C	2004	2	feb	4	1	0	1.29027	7.6069	-4.5431	55.9608	30.3879	2.69263	7.10862	12.64
C	2004	3	mar	1	0	0	4.89899	11.6266	-1.82339	50.8313	27.9597	5.51889	7.5871	15.9461
C	2004	4	apr	1	0	0	12.2357	19.5458	4.92667	49.6361	25.175	8.11389	8.095	18.7353
C	2004	5	may	1	0	0	17.1836	22.5395	11.8298	62.0316	41.0081	7.13221	6.70565	17.6032
C	2004	6	jun	2	1	0	22.0597	27.5517	16.7883	62.5649	43.3083	31.3908	6.95083	17.3243
C	2004	7	jul	2	0	0	24.8926	28.8226	21.6161	75.411	59.8629	18.6437	4.73629	14.181
C	2004	8	aug	2	0	0	24.6505	29.2984	20.9	71.4315	53.4758	14.5316	6.48306	16.4123
C	2004	9	sep	3	1	3	19.9129	25.2817	15.5183	70.8938	48.7417	10.423	5.90083	14.293
C	2004	10	oct	3	4	3	12.602	20.3468	6.04758	62.2124	32.3952	0.93125	7.53387	13.991
C	2004	11	nov	3	3	0	6.95174	13.5917	1.38167	67.425	41.1083	4.24519	5.43583	8.483
C	2004	12	dec	4	1	0	0.663038	6.71371	-4.34919	63.5887	37.629	4.49454	6.00484	8.04129
C	2005	1	jan	4	0	0	-3.2831	2.21048	-8.57258	55.7056	33.129	0.424226	6.34113	9.29129
C	2005	2	feb	4	0	0	-2.3407	2.80536	-7.43125	52.01	30.6071	2.15032	6.31339	11.1889
C	2005	3	mar	1	0	0	3.70104	9.94355	-2.16935	53.6986	29.2016	4.375	7.86694	16.54
C	2005	4	apr	1	1	0	12.555	19.4942	5.48583	50.2372	26.5583	7.51118	8.13333	18.833
C	2005	5	may	1	2	0	16.6865	23.2556	10.0226	57.2476	32.5887	6.44056	8.97984	21.0429
C	2005	6	jun	2	0	0	22.2131	27.4208	17.7658	68.9153	47.35	17.0944	7.07917	18.2523
C	2005	7	jul	2	0	0	24.654	28.65	21.4137	78.8532	63.0968	22.6841	5.2379	14.5371
C	2005	8	aug	2	0	0	24.3898	28.7815	21.1266	79.5998	61.7823	17.2721	5.19355	14.2474
C	2005	9	sep	3	0	0	21.0098	25.56	17.1758	74.6163	55.575	20.2107	5.50833	13.493
C	2005	10	oct	3	10	0	12.6602	19.0766	7.47258	72.6092	44.9194	6.77604	6.19677	12.3313
C	2005	11	nov	3	7	0	6.28736	13.2208	0.249167	62.1625	33.8917	1.90729	6.41083	9.63067
C	2005	12	dec	4	3	0	-5.18827	0.16371	-10.4597	59.4247	36.5565	0.902049	6.12661	8.16194
C	2006	1	jan	4	1	0	-1.29603	4.00968	-5.9871	62.0558	40.3629	3.49683	5.22339	7.89194
C	2006	2	feb	4	0	0	-0.653757	4.5	-5.60268	59.3129	36.9911	3.15442	6.01429	11.3482
C	2006	3	mar	1	2	0	4.73528	10.8766	-1.4871	50.9227	26.5726	0.926667	7.70887	16.15
C	2006	4	apr	1	2	0	10.7713	16.6225	4.94583	55.6858	34.8333	6.91901	5.75333	15.2043
C	2006	5	may	1	0	0	17.4645	23.0815	12.0177	61.0312	39.8306	10.4318	7.3871	19.289
C	2006	6	jun	2	1	1	21.4719	26.7617	16.7208	68.758	46.3917	11.397	7.06083	18.826
C	2006	7	jul	2	0	0	22.7218	26.0097	20.2081	83.086	70.0161	26.5156	2.47177	10.4532
C	2006	8	aug	2	2	0	25.9441	30.9831	22.0137	75.0228	54.0565	5.84071	6.85403	18.6326
C	2006	9	sep	3	2	0	18.588	24.4225	13.5617	70.626	43.55	3.03929	6.61167	15.405
C	2006	10	oct	3	6	1	15.2859	22.4105	9.53952	72.3464	39.6048	8.14375	6.6379	13.0039
C	2006	11	nov	3	5	0	7.20694	12.5492	2.1475	68.8799	42.375	5.22584	4.68333	8.505
C	2006	12	dec	4	0	0	0.220531	5.65	-4.03952	72.7853	46.1694	1.9584	4.7621	7.40871
C	2007	1	jan	4	0	0	-1.08004	4.56452	-5.79032	67.6237	39.4435	1.26081	5.39839	8.45161
C	2007	2	feb	4	0	0	2.42243	9.11786	-3.28036	63.3039	34.7768	5.26424	6.38482	11.9111
C	2007	3	mar	1	0	1	5.40087	11.3073	-0.0298387	64.5581	38.1694	6.97731	4.63952	12.4613
C	2007	4	apr	1	1	0	10.8343	17.435	4.16	54.4934	26.15	2.50352	6.77417	18.7877
C	2007	5	may	1	0	1	17.2834	23.6524	11.429	63.2436	34.121	12.254	6.88387	20.6339
C	2007	6	jun	2	0	0	21.7962	27.2067	16.5883	66.0781	43.7083	8.5232	5.71083	18.5007
C	2007	7	jul	2	0	0	23.4584	27.2927	20.2911	77.7624	60.7339	16.7637	3.34758	13.8745
C	2007	8	aug	2	0	1	25.3571	29.5774	22.029	80.1751	60.4677	20.6458	3.8379	14.5252
C	2007	9	sep	3	0	7	20.6025	24.6425	17.3208	82.0038	62.6417	17.2443	2.67917	10.4433
C	2007	10	oct	3	15	2	13.5992	19.7355	8.60726	75.162	44.8065	3.43712	5.22419	12.5548
C	2007	11	nov	3	12	4	4.66198	11.34	-0.820833	69.6851	39.5333	2.00804	5.79667	10.079
C	2007	12	dec	4	4	0	0.0723454	4.89355	-3.95	75.166	51.6935	1.64764	3.65484	6.25774
C	2008	1	jan	4	1	0	-2.5955	2.1371	-6.82097	68.6966	43.3387	3.89568	4.54597	7.56258
C	2008	2	feb	4	0	0	-2.88071	3.46638	-8.825	57.2281	28.7759	1.8375	7.38276	12.3293
C	2008	3	mar	1	0	0	5.89745	12.2105	0.149194	62.6947	36.3347	3.63936	5.87419	13.8577
C	2008	4	apr	1	1	0	12.5842	19.5792	5.5675	57.8493	29.7567	3.14722	6.57667	17.1323
C	2008	5	may	1	1	0	17.1741	23.6444	10.6129	61.0832	34.1532	8.01424	7.24919	20.1139
C	2008	6	jun	2	1	0	20.768	25.7008	16.1208	68.733	48.5333	9.19583	5.22583	16.7613
C	2008	7	jul	2	2	0	25.7563	30.0048	22.3653	78.4278	59.3387	14.2229	3.41694	14.8358
C	2008	8	aug	2	1	0	24.2166	29.0621	20.0621	75.0971	53.4194	18.5729	6.275	17.2732
C	2008	9	sep	3	1	1	20.5531	26.5125	15.8442	74.9292	46.65	7.175	5.49833	14.9607
C	2008	10	oct	3	4	1	13.9622	20.7105	8.50968	74.4069	44.2661	2.62604	5.68871	11.4539
C	2008	11	nov	3	4	1	5.52189	11.6708	0.155	69.4652	41.3583	1.16076	4.7625	8.462
C	2008	12	dec	4	4	0	-0.41875	5.20645	-5.46694	66.1443	41.3306	1.19538	5.27661	7.51032
C	2009	1	jan	4	2	0	-3.77419	2.56581	-9.29419	64.7968	37.671	1.63491	5.54581	8.93226
C	2009	2	feb	4	0	0	2.16214	7.94857	-3.27714	64.7914	35.7214	4.53155	4.39643	9.88339
C	2009	3	mar	1	0	0	5.7	12.0445	-0.569677	56.9252	28.729	5.5841	6.41613	15.0911
C	2009	4	apr	1	0	1	11.7487	19.0687	4.67733	54.4893	27.3733	5.44946	6.99	17.9785
C	2009	5	may	1	0	0	17.7329	24.8548	10.9852	59.8329	31.4452	11.1793	7.68903	19.9642
C	2009	6	jun	2	2	0	21.6833	27.6073	16.126	66.256	39.6	10.2243	6.95	20.1977
C	2009	7	jul	2	1	0	23.289	28.0258	19.6471	78.069	55.9871	22.1516	3.65161	14.2681
C	2009	8	aug	2	0	0	23.9535	29	19.7748	74.1703	52.2387	14.0923	5.10774	15.1477
C	2009	9	sep	3	1	1	19.83	26.0393	14.7533	73.69	44.76	6.75	6.19067	15.1673
C	2009	10	oct	3	11	0	13.4781	21.2968	7.16	69.3832	34.0323	7.74306	7.25355	12.4753
C	2009	11	nov	3	6	0	5.94	11.0467	1.44067	68.2553	46.0133	5.71878	4.17067	6.457
C	2009	12	dec	4	3	1	-1.46774	3.40258	-5.82387	66.9677	42.5226	2.68156	4.48774	6.23806
U	2001	1	jan	4	2	0	-2.4515	2.07957	-6.97312	68.9203	49.3333	4.10036	4.38172	8.56806
U	2001	2	feb	4	0	0	0.514955	5.64048	-3.90833	66.1153	45.4286	7.85042	5.85	11.3557
U	2001	3	mar	1	0	0	4.53017	10.429	-1.12419	61.0473	38.543	1.75835	8.92366	15.2252
U	2001	4	apr	1	0	0	11.6862	18.9283	4.675	58.3081	33.95	4.50913	10.0744	19.1777
U	2001	5	may	1	0	0	17.9429	23.8597	12.6414	63.7827	42.7043	3.0377	10.3349	19.1142
U	2001	6	jun	2	0	0	21.7185	26.0467	17.965	70.6664	55.5556	18.3585	8.95833	14.431
U	2001	7	jul	2	1	0	25.8264	29.9457	22.5699	77.094	62.328	15.2836	9.51129	14.1219
U	2001	8	aug	2	0	0	25.5256	30.4871	21.357	72.9879	54.2527	11.6799	10.429	17.8174
U	2001	9	sep	3	1	2	20.8624	27.1261	15.2928	66.5229	42.9389	7.22381	10.1511	18.3427
U	2001	10	oct	3	13	6	14.9149	20.9242	9.89355	74.28	49.3871	8.17659	7.90914	11.9906
U	2001	11	nov	3	8	5	6.18586	12.5728	0.746111	70.1812	43.2167	1.47741	7.41167	10.093
U	2001	12	dec	4	1	1	-0.132213	4.84409	-4.52796	69.3501	46.328	2.22482	6.69516	8.83484
U	2002	1	jan	4	0	0	1.18206	5.60161	-2.91882	71.3674	52.8925	4.05707	5.90591	8.75323
U	2002	2	feb	4	0	0	1.03078	7.34405	-4.27262	68.7153	42.7798	1.49278	7.51726	12.0671
U	2002	3	mar	1	0	0	6.64283	13.2011	0.437634	65.2784	38.1129	4.03841	8.18333	15.5597
U	2002	4	apr	1	0	0	13.035	19.28	7.00278	61.6289	38.9889	19.3618	8.87556	18.7093
U	2002	5	may	1	2	0	16.5763	22.0575	11.8038	69.8098	49.1882	12.2821	7.97366	17.8245
U	2002	6	jun	2	0	0	21.1792	26.6094	16.0806	68.4498	46.7389	8.51604	9.35833	19.8553
U	2002	7	jul	2	0	0	24.7446	28.6435	21.5495	78.1053	64.3333	15.3589	7.29247	15.5429
U	2002	8	aug	2	1	0	24.0879	27.3941	21.4194	82.3613	70.7312	19.5507	4.81667	10.8784
U	2002	9	sep	3	2	1	20.0974	25.5567	15.8856	76.1667	55.5889	7.11445	7.49444	14.83
U	2002	10	oct	3	25	2	12.0966	18.1371	6.91237	70.2357	46.8495	6.53078	6.86828	12.8261
U	2002	11	nov	3	17	3	4.25775	9.39278	-0.767222	67.4905	46.2722	3.57757	5.865	8.98367
U	2002	12	dec	4	4	2	1.57381	6.26882	-2.59785	72.4904	52.2688	3.94737	5.25484	7.81871
U	2003	1	jan	4	0	0	-2.77988	2.00806	-7.37258	72.2867	52.0591	2.41866	5.66075	9.0729
U	2003	2	feb	4	2	0	1.61873	6.75	-2.8256	70.9725	48.5357	5.72903	6.05893	11.4743
U	2003	3	mar	1	0	0	5.19223	10.5914	0.164516	66.5679	42.8441	3.68163	6.62688	14.1513
U	2003	4	apr	1	0	0	11.81	17.2289	6.69611	66.1507	44.9611	15.5488	6.64778	15.8293
U	2003	5	may	1	1	0	17.8272	23.7027	12.4806	67.8342	45.9892	15.1255	8.02742	19.8074
U	2003	6	jun	2	0	0	20.7425	25.1778	16.7761	72.6437	55.1833	13.1591	6.03722	15.7577
U	2003	7	jul	2	1	0	23.0856	26.6328	20.2065	78.7787	65.0376	18.2596	4.43387	13.6645
U	2003	8	aug	2	0	0	23.6942	27.5801	20.6839	78.226	64.2634	12.9548	4.53763	13.1484
U	2003	9	sep	3	1	2	20.7457	25.6322	16.8111	75.64	56.9	16.3005	6.02444	13.604
U	2003	10	oct	3	30	9	12.9708	19.6624	7.21129	67.0013	39.8495	3.80509	7.55591	13.8461
U	2003	11	nov	3	19	0	9.07958	14.4494	4.17333	70.2859	50.7111	3.55332	4.64056	7.98267
U	2003	12	dec	4	4	0	1.14812	5.92043	-3.17634	69.7666	46.7903	1.53031	4.9828	7.84161
U	2004	1	jan	4	4	0	-2.01584	3.45	-6.67097	71.6873	45.1505	1.54853	5.71613	9.45387
U	2004	2	feb	4	1	0	1.90738	7.92299	-3.61724	66.0431	38.0402	2.45343	7.16264	12.979
U	2004	3	mar	1	1	0	5.23212	11.5344	-0.901075	60.5105	33.828	4.37125	7.67419	16.61
U	2004	4	apr	1	1	0	11.5141	18.3822	4.82278	60.5537	32.3	9.25896	8.39333	19.2853
U	2004	5	may	1	0	0	16.7927	21.8586	11.9172	71.9812	50.2742	7.2275	7.03226	18.3526
U	2004	6	jun	2	1	0	21.8115	26.8739	17.2867	71.4391	50.9889	25.5247	6.84278	17.0957
U	2004	7	jul	2	0	1	25.1287	28.8527	22.078	81.3871	66.4032	19.2556	5.07688	13.4416
U	2004	8	aug	2	2	0	25.5448	30.2839	21.8688	76.9494	57.3011	16.8727	6.81882	17.5987
U	2004	9	sep	3	0	1	20.8309	26.1778	16.3417	76.2706	52.4111	14.3854	6.02667	14.7297
U	2004	10	oct	3	44	12	13.9222	21.1059	7.57312	67.6801	36.4946	1.14167	7.80591	14.81
U	2004	11	nov	3	8	2	8.4131	14.6561	3.19833	74.3097	45.6556	6.36546	5.13833	8.96333
U	2004	12	dec	4	9	0	2.51349	7.9172	-2.35591	68.1434	42.5645	4.49148	5.51022	8.46161
U	2005	1	jan	4	1	0	-1.56761	3.20054	-6.22419	65.0078	41.4301	0.55398	5.74194	9.33194
U	2005	2	feb	4	1	0	-1.05315	3.40595	-5.42202	61.6915	38.7619	3.503	6.01071	12.1804
U	2005	3	mar	1	1	0	3.87504	9.53763	-1.54301	63.4588	37.1237	3.76523	7.82151	16.9223
U	2005	4	apr	1	0	0	12.3756	18.9567	6.04722	61.0921	34.5444	6.37701	8.09389	19.2807
U	2005	5	may	1	0	0	16.5661	22.9903	10.3774	65.9211	38.5914	7.48968	8.62312	21.3781
U	2005	6	jun	2	0	0	21.9708	26.8589	18.0239	76.9167	55.9889	15.7192	6.48722	16.3557
U	2005	7	jul	2	0	0	24.9502	28.914	21.7349	81.4951	65.3656	25.4244	5.16344	15.1335
U	2005	8	aug	2	3	1	24.9878	29.1194	21.8774	80.6705	63.0269	16.8248	5.23871	14.1519
U	2005	9	sep	3	4	1	21.7748	26.4283	18.0567	76.9421	57.8278	17.6935	5.28111	12.7817
U	2005	10	oct	3	19	0	13.5969	19.8882	8.36237	74.3085	45.2419	2.97823	6.19785	12.9703
U	2005	11	nov	3	23	2	7.69313	14.2478	1.83556	66.9245	37.7611	2.48708	5.98278	10.0587
U	2005	12	dec	4	6	0	-3.26915	1.43763	-7.96559	71.7274	49.0645	1.94831	4.68548	8.0971
U	2006	1	jan	4	1	0	-0.08181	4.63602	-4.16237	70.3248	46.8333	4.50224	4.72688	8.08226
U	2006	2	feb	4	1	0	0.352604	5.10238	-4.3619	65.6064	42.1369	2.68563	5.76488	11.5707
U	2006	3	mar	1	0	1	4.80231	10.736	-1.25054	59.0379	32.3925	0.871136	7.18602	16.0916
U	2006	4	apr	1	0	0	10.4891	15.6278	5.35556	66.3178	42.7333	6.45733	5.62	15.6407
U	2006	5	may	1	0	0	17.356	22.6753	12.3027	69.0815	46.2473	10.8012	6.79677	18.3616
U	2006	6	jun	2	0	0	21.3152	26.39	17.0267	73.2204	50.7	12.598	6.60833	17.8667
U	2006	7	jul	2	0	0	23.4583	26.6323	20.9844	83.5645	70.0591	20.6221	2.9043	11.0329
U	2006	8	aug	2	1	0	26.3322	31.2296	22.5263	75.119	54.6989	5.23489	7.80215	18.7516
U	2006	9	sep	3	2	1	19.5498	25.2172	14.7556	72.1824	45.3667	3.3505	7.01167	15.3363
U	2006	10	oct	3	28	6	16.3844	22.9258	11.1785	74.8611	43.4946	7.65278	7.01774	12.7561
U	2006	11	nov	3	16	8	8.38009	13.7839	3.03056	67.8229	42.3833	4.34994	5.26944	8.42533
U	2006	12	dec	4	4	0	1.33911	6.74086	-2.78387	73.2036	47.3172	2.63767	4.69839	7.29129
U	2007	1	jan	4	0	0	-0.0847222	5.15968	-4.48871	71.6882	44.5215	1.92621	4.88172	8.24968
U	2007	2	feb	4	0	0	3.17173	9.60179	-2.08929	68.2225	39.8333	7.47095	6.44226	11.7511
U	2007	3	mar	1	3	0	6.18674	11.9231	1.04086	68.9382	42.1559	7.74687	4.99785	12.2174
U	2007	4	apr	1	0	0	10.6875	16.7239	4.55278	62.9039	34.8611	4.35423	7.20111	17.7787
U	2007	5	may	1	0	0	17.3828	23.0812	11.9892	68.3351	41.5108	9.72565	7.26237	19.3471
U	2007	6	jun	2	0	0	22.0689	26.8439	17.6778	70.9623	51.2	9.33697	5.33	17.681
U	2007	7	jul	2	2	0	24.1186	27.9844	21.0419	80.1028	63.2742	13.6284	3.45054	14.3787
U	2007	8	aug	2	1	0	26.2264	30.2075	23.1086	80.2847	62.7688	20.6047	4.39839	14.1677
U	2007	9	sep	3	3	0	21.3479	25.2944	18.1178	81.2252	63.6444	22.1653	3.12167	10.6493
U	2007	10	oct	3	24	7	14.6573	20.4935	9.92581	73.9928	45.6344	5.23729	5.58871	12.2813
U	2007	11	nov	3	21	9	6.5053	12.8089	1.19556	69.2178	39.7833	1.54365	5.96111	9.67667
U	2007	12	dec	4	4	0	2.06846	6.85323	-1.88871	75.7274	53.457	2.32145	3.22957	6.2829
U	2008	1	jan	4	0	1	-1.29129	2.81828	-4.9543	69.5924	46.0753	3.19323	4.54946	8.47194
U	2008	2	feb	4	0	0	-1.60324	3.87759	-6.77931	61.3013	34.7816	2.39088	7.07759	12.8421
U	2008	3	mar	1	0	0	6.18163	12.4371	0.457527	66.6537	38.8226	5.19265	6.60968	14.7745
U	2008	4	apr	1	0	0	12.4431	19.0389	6.21167	64.0414	35.5167	4.6682	6.66111	17.652
U	2008	5	may	1	1	0	16.9307	22.8065	11.3215	66.4233	39.4194	9.72161	7.2414	19.4739
U	2008	6	jun	2	1	0	21.0609	25.7417	17.1228	74.4986	54.7556	13.9113	4.72444	17.33
U	2008	7	jul	2	1	0	25.8446	29.6543	22.7952	81.8275	64.672	12.7448	3.64677	13.7065
U	2008	8	aug	2	1	1	24.8442	29.3414	20.9086	77.3748	57.2151	11.7258	6.68925	17.7735
U	2008	9	sep	3	4	1	21.4413	26.8967	17.085	76.1129	50.0667	5.75619	5.49444	14.763
U	2008	10	oct	3	26	6	15.1667	21.6597	9.89892	74.3956	44.9785	4.65724	5.74839	11.8019
U	2008	11	nov	3	11	0	7.40777	13.2222	2.25667	71.7528	44.9	2.77814	4.73444	8.21633
U	2008	12	dec	4	1	0	1.88275	6.92043	-2.76667	68.5878	45.6559	2.10765	4.53495	7.31968
U	2009	1	jan	4	1	0	-1.64839	4.3457	-6.85914	67.714	39.8763	1.33301	5.10699	8.88581
U	2009	2	feb	4	0	0	2.93333	8.45298	-2.28274	69.1024	42.0655	4.64302	4.0875	9.26214
U	2009	3	mar	1	0	0	6.09677	12.0392	0.20914	62.6269	34.3387	5.58237	6.64892	15.0413
U	2009	4	apr	1	0	0	11.3711	18.4422	4.88778	62.5006	32.2556	7.42167	7.49667	18.2173
U	2009	5	may	1	0	0	17.6613	24.0274	11.5887	65.6597	38.0054	11.7274	7.94409	20.2387
U	2009	6	jun	2	1	0	21.7339	27.1206	16.7228	70.86	45.3722	8.68601	6.95444	19.1027
U	2009	7	jul	2	0	0	23.7516	28.0194	20.1489	80.1769	60.2796	21.0796	4.14086	16.329
U	2009	8	aug	2	1	0	24.847	29.6629	20.8016	76.6168	53.7258	15.4123	5.86935	17.0913
U	2009	9	sep	3	2	1	20.755	26.7372	15.8506	75.1867	46.1556	5.57778	6.61333	16.3927
U	2009	10	oct	3	8	3	15.1817	22.3984	9.16828	69.6914	35	5.39341	7.16237	13.4713
U	2009	11	nov	3	15	2	7.63389	12.4994	3.26889	70.5911	48.1111	3.77663	4.03	7.57333
U	2009	12	dec	4	6	0	0.366129	4.94946	-3.93011	70.886	47.2366	2.92956	3.93011	6.63516
D	2001	1	jan	4	0	0	0.662634	4.36774	-2.75806	54.9583	36	2.82727	5.41935	8.39742
D	2001	2	feb	4	0	0	4.11354	8.525	-0.214286	51.1205	30.6071	7.7375	6.30357	11.2932
D	2001	3	mar	1	0	0	9.15027	14.3323	4.1	40.1358	20.6129	0.56	7.46452	15.5284
D	2001	4	apr	1	0	0	15.8242	21.6767	9.79667	43.5542	21.6	3.9	8.7	19.861
D	2001	5	may	1	0	0	20.4755	25.3613	15.7	56.2554	34.6129	6.78889	7.22581	19.5616
D	2001	6	jun	2	0	0	23.9582	28.1233	20.2667	66.3153	46.4	21.7615	5.39333	16.6453
D	2001	7	jul	2	0	0	27.7258	31.5097	24.4194	70.8374	50.7419	8.06	6.46452	18.0265
D	2001	8	aug	2	0	0	27.2542	30.9323	23.9194	67.7366	46.6774	4.32941	5.73871	16.001
D	2001	9	sep	3	0	0	22.0426	26.6167	17.9767	66.9542	44.0333	10.5167	6.65667	15.063
D	2001	10	oct	3	0	0	16.5353	21.2839	12.629	71.3185	46.0323	7.21111	5.14194	10.9694
D	2001	11	nov	3	1	0	8.29389	13.82	3.60667	53.0056	30	2.66667	7.4	10.22
D	2001	12	dec	4	0	0	1.87339	6.32581	-1.79355	48.5806	28.4194	3.22857	6.94516	9.01
D	2002	1	jan	4	1	0	2.27191	6.37097	-1.34194	55.0188	37	4.70909	6.23226	9.08548
D	2002	2	feb	4	0	0	3.93943	9.72143	-1.075	43.4375	22.8571	0.25	7.52857	12.5636
D	2002	3	mar	1	0	0	10.0884	16.0032	4.70645	46.3992	23.7097	4.59091	6.79677	14.9197
D	2002	4	apr	1	0	0	15.5444	21.1433	9.60667	49.9347	29.6	8.05556	7.21333	17.381
D	2002	5	may	1	0	0	18.5128	23.5355	13.5161	60.8481	38.1935	6.72857	6.68387	18.1113
D	2002	6	jun	2	1	0	23.3032	28.6633	18.16	56.4236	33.9333	1.94167	7.58	19.768
D	2002	7	jul	2	0	0	26.1153	29.9806	22.9419	72.4543	55.0645	8.06667	4.2129	14.9523
D	2002	8	aug	2	0	0	24.8634	28.1516	22.1871	77.0417	61.9355	27.212	3.28065	11.7216
D	2002	9	sep	3	1	0	20.9807	25.59	16.7867	70.4014	48.3333	5.26154	6.05333	14.38
D	2002	10	oct	3	0	0	14.3172	19.4097	9.78387	63.414	39.871	4	6.6871	11.9184
D	2002	11	nov	3	2	0	6.19264	11.13	1.41667	48.9528	27.6667	0.4	7.07667	10.4597
D	2002	12	dec	4	0	0	3.36962	7.21935	-0.0193548	58.6263	41	2.2	5.48387	7.72516
D	2003	1	jan	4	0	0	-0.385215	3.82581	-4.24516	50.5739	31.9032	3.1125	6.87419	9.71742
D	2003	2	feb	4	0	0	3.96116	8.21786	-0.075	56.9167	35.6429	5.125	6.16071	11.9929
D	2003	3	mar	1	0	0	7.80806	12.1968	3.29355	56.1976	33.8065	3.16154	5.78387	13.7932
D	2003	4	apr	1	0	0	14.0588	19.0333	9.53	58.2569	36.6667	12.5	6.32667	15.596
D	2003	5	may	1	0	0	18.4593	23.6903	13.2935	63.7648	41.0968	15.58	6.38387	17.5452
D	2003	6	jun	2	0	0	22.2065	26.2567	18.4133	67.1347	47.8667	12.9615	4.76333	15.3683
D	2003	7	jul	2	0	0	22.5609	25.8355	19.8903	80	65.7097	20.6	2.94194	12.1213
D	2003	8	aug	2	1	0	24.9685	28.6935	21.7871	75.1694	56.3226	10.2842	3.84839	13.4406
D	2003	9	sep	3	0	1	22.1122	26.2767	18.6467	74.2542	54.4333	16.2333	4.44333	12.1577
D	2003	10	oct	3	2	0	14.9984	20.4968	9.93548	56.3051	31.8387	3	7.90645	13.6513
D	2003	11	nov	3	2	0	10.8288	15.14	6.78333	67.0403	45.5333	3.45833	4.86667	7.99333
D	2003	12	dec	4	0	0	3.26438	7.77742	-0.570968	48.578	28.6452	2.75	7.06774	9.1529
D	2004	1	jan	4	0	0	0.867473	5.57742	-3.06452	46.754	27.2258	0.2	7.2871	9.97355
D	2004	2	feb	4	0	0	4.76853	10.2034	-0.337931	42.842	21.6552	3.65556	7.98966	13.0341
D	2004	3	mar	1	0	0	8.38132	14.0548	2.98065	41.6263	19.7097	1.78571	7.63226	15.9239
D	2004	4	apr	1	0	0	15.3536	21.56	9.54	42.0569	20.1333	8.4	8.13333	18.5943
D	2004	5	may	1	0	0	19.4055	24.029	14.9355	59.0739	38.2258	5.52	6.17097	16.9639
D	2004	6	jun	2	0	0	23.0985	28.2767	18.23	59.8083	40.6333	24.6667	5.89667	17.377
D	2004	7	jul	2	0	0	27.2594	31.429	23.5548	69.2634	51.5161	9.82143	5.8871	16.7871
D	2004	8	aug	2	0	0	25.8636	30.2355	22.4871	69.5605	50.3548	19.4895	4.6	14.3003
D	2004	9	sep	3	0	1	21.5683	25.7333	18.1467	73.1486	52.8667	7.83889	3.84333	11.73
D	2004	10	oct	3	2	0	15.7702	21.0774	10.8258	59.0874	36.8387	1.93333	6.85161	12.7632
D	2004	11	nov	3	0	0	10.936	16.4333	6.17	60.4778	35.9	6.75714	6.62667	9.88433
D	2004	12	dec	4	0	0	4.83683	9.51935	0.66129	50.2137	29	2.77143	6.49355	9.34581
D	2005	1	jan	4	0	0	0.751478	5.06452	-3.1	44.1169	25.8387	0.722222	7.02258	10.6723
D	2005	2	feb	4	0	0	1.36027	5.58214	-2.54286	45.0863	28.3214	2.37143	6.04643	12.1507
D	2005	3	mar	1	1	0	7.15323	12.4968	2.15806	45.0793	24.1613	6.1	7.89677	16.9371
D	2005	4	apr	1	0	0	15.9304	21.9667	10.0567	43.2375	23.1333	7.46667	7.92333	19.7333
D	2005	5	may	1	0	0	19.5118	25.3581	14.0226	49.9704	27.5806	4.65714	8.43548	22.3916
D	2005	6	jun	2	0	0	24.8504	29.9467	20.3867	60.2319	38.0667	9.15385	7.10333	20.0793
D	2005	7	jul	2	0	0	26.4035	30.3903	23.1484	72.2379	53.7742	10.1895	4.36452	15.7729
D	2005	8	aug	2	0	0	26.3218	30.4871	23.0774	71.7325	52.2581	14.7474	4.68065	13.2681
D	2005	9	sep	3	0	0	22.6526	26.6	19.4233	72.1569	54.4	3.11875	3.85333	11.758
D	2005	10	oct	3	3	1	15.8261	20.6903	11.4742	62.3427	40.1613	0.67	5.62258	9.91677
D	2005	11	nov	3	0	0	9.98958	15.31	5.03	48.8208	28.0333	2.41667	7.5	8.876
D	2005	12	dec	4	0	1	-0.337097	4.12258	-4.27419	42.9382	25.129	0.4	7.25484	9.40516
D	2006	1	jan	4	0	0	2.59046	6.64194	-1.02903	49.0134	31.5161	2.11429	5.53548	7.8271
D	2006	2	feb	4	0	0	3.11533	7.73929	-1.11429	47.6295	27.5	2.29091	6.20714	10.2304
D	2006	3	mar	1	0	0	8.20215	13.7419	3	41.6962	20.9677	2.3	7.51613	14.1403
D	2006	4	apr	1	0	0	13.43	18.5467	8.72667	51.575	32.7667	5.40833	5.86667	14.229
D	2006	5	may	1	0	1	18.8839	23.8677	14.3677	58.6694	38.4194	8.59286	5.86129	15.5052
D	2006	6	jun	2	0	0	23.381	28.3767	18.7967	60.9972	39.5667	5.81818	6.57	17.0323
D	2006	7	jul	2	0	0	24.1835	27.2516	21.6355	79.4247	65.2258	22.724	2.5	9.68806
D	2006	8	aug	2	0	0	28.1852	32.7194	24.4903	67.9046	47	9.11429	6.83548	14.7655
D	2006	9	sep	3	0	0	20.6039	25.06	16.6433	67.0347	46.7667	10.8143	5.04333	12.9437
D	2006	10	oct	3	0	0	18.631	24.3097	13.8871	61.7352	35.6452	5.56667	6.98387	12.9332
D	2006	11	nov	3	2	1	10.2001	14.67	5.99667	56.9625	36.7	3.52	4.73	7.54233
D	2006	12	dec	4	1	0	3.6207	8.16774	-0.374194	54.1788	35.0645	1.5	5.17419	7.25161
D	2007	1	jan	4	0	0	3.26384	7.67419	-0.474194	45.8562	27.5161	0	4.96452	7.89161
D	2007	2	feb	4	0	0	6.17292	11.4643	1.39286	50.808	27.6786	6	6.80714	11.2275
D	2007	3	mar	1	0	0	8.84005	13.9258	4.34194	51.6344	31.3548	5.39167	5.86774	13.3603
D	2007	4	apr	1	0	0	14.1614	19.52	8.78333	44.2139	23.3	4.11667	7.19	17.129
D	2007	5	may	1	0	0	19.9023	25.8161	14.5516	51.211	27.9355	4.94444	7.56452	19.7797
D	2007	6	jun	2	0	0	23.0014	27.7467	18.79	62.6806	42.6	5.79286	4.73333	15.9913
D	2007	7	jul	2	0	0	24.8105	28.4032	21.6032	72.9745	56.7742	6.725	3.90323	13.5861
D	2007	8	aug	2	0	0	27.5782	31.4613	24.2806	72.4274	53.2581	10.4211	4.92581	14.3387
D	2007	9	sep	3	0	0	22.3579	25.5233	19.5533	76.0597	60.8333	18.235	3.19667	10.2797
D	2007	10	oct	3	1	0	16.646	21.3129	12.5774	65.6841	42.9355	4.95	5.80645	12.6345
D	2007	11	nov	3	1	1	8.98222	14.4133	4.23667	51.1639	30.3333	0	7.28667	10.951
D	2007	12	dec	4	1	0	4.34731	8.19032	1.0129	56.4435	40.2581	3.21111	5.11613	7.82032
D	2008	1	jan	4	0	0	1.51559	5.22258	-1.7871	55.2234	37.4516	4.8125	4.95806	7.31645
D	2008	2	feb	4	0	0	1.51006	6.48276	-2.97241	37.7816	20.7241	1.66667	7.92759	13.84
D	2008	3	mar	1	0	0	9.07272	14.3742	4.01935	51.2997	29.5484	2.38	6.49355	15.0081
D	2008	4	apr	1	0	0	14.8006	20.3833	9.45	52.9958	30.8	6.05556	7.01333	18.058
D	2008	5	may	1	0	0	19.7282	25.2516	14.3323	52.8858	28.8387	8.25	7.28065	20.3865
D	2008	6	jun	2	0	0	21.1603	25.22	17.3267	68.7361	51.2667	12.4867	4.19333	16.54
D	2008	7	jul	2	1	0	28.3608	32.6097	24.8871	68.9194	49.7419	5.55	4.49032	16.9558
D	2008	8	aug	2	0	0	25.8423	30.2581	22.2774	68.7984	48.9355	19.6083	5.99677	17.3852
D	2008	9	sep	3	0	0	23.0658	27.6233	19.05	65.9208	44.1333	1.825	5.24667	14.624
D	2008	10	oct	3	1	1	17.7716	23.1806	12.8226	57.9509	33.8548	2	7.02258	13.0526
D	2008	11	nov	3	0	0	9.46861	14.2967	5.06667	56.0403	34.7	1.4625	5.35333	9.252
D	2008	12	dec	4	0	0	3.31922	8.29677	-1.06452	49.5632	30.2258	1.91667	5.58387	8.3129
D	2009	1	jan	4	0	0	0.706452	5.8	-3.72903	44.0806	26.1613	1.18333	5.96129	9.33452
D	2009	2	feb	4	0	0	6.41429	11.5357	1.73214	50.3286	26.75	2.9375	5.60357	11.1586
D	2009	3	mar	1	0	0	8.9871	14.5387	3.66774	44.0355	22.5806	1.74545	6.76774	15.8774
D	2009	4	apr	1	0	0	15.4133	21.8667	9.50333	42.4567	21.3667	2.36667	7.97667	19.2883
D	2009	5	may	1	0	0	20.8968	27.6903	15.0806	47.7194	23.7419	8.03077	7.79677	20.5271
D	2009	6	jun	2	1	0	24.04	29.58	19.27	56.46	34.9333	11.3583	6.01	18.8473
D	2009	7	jul	2	0	0	24.7548	29.3806	21.3161	71.8677	52	14.6957	2.4871	13.4558
D	2009	8	aug	2	0	0	25.4806	29.6516	22.2	66.171	48.0968	4.5	4.00645	15.051
D	2009	9	sep	3	0	0	22.6067	28.0133	18.24	63.7233	40.3333	5.92857	5.62333	15.143
D	2009	10	oct	3	0	1	17.1516	23.3742	11.7097	53.8677	27.9032	5.16	7.25161	13.8119
D	2009	11	nov	3	0	0	9.13333	14.1233	4.87333	55.82	37.0667	4.05	5.24667	8.813
D	2009	12	dec	4	0	0	2.53226	7.23548	-1.33548	47.7548	29.0645	5.58333	6.32903	9.02581
J	2001	1	jan	4	0	0	-2.24852	2.06129	-6.42258	67.871	42.9355	2.91429	4.6871	8.79516
J	2001	2	feb	4	0	0	0.936756	5.86429	-3.27143	63.7455	39.5	7	5.61786	11.5193
J	2001	3	mar	1	0	0	5.86586	11.9903	0.264516	53.9637	27.7097	1.45455	6.76452	15.6116
J	2001	4	apr	1	0	0	13.7064	20.5533	6.89667	50.8972	24.9333	3.4	8.34667	20.1787
J	2001	5	may	1	0	0	19.5706	25.2226	14.3065	59.5699	34.3871	3.02	7.37097	20.0142
J	2001	6	jun	2	0	0	22.9685	27.4	19.0333	69.8236	50.2	15.6133	4.64667	15.1793
J	2001	7	jul	2	0	0	26.062	30.1968	22.7484	76.6667	57	10.0588	5.3871	16.51
J	2001	8	aug	2	0	0	25.7306	30.3129	21.8161	71.2621	49.6452	6.00769	6.77419	17.54
J	2001	9	sep	3	0	0	21.9097	27.5833	16.6967	63.4931	38.6667	3.15	7.14	16.5957
J	2001	10	oct	3	2	0	15.8832	21.0355	11.3806	73.1707	46.6774	8.29091	5.14194	11.4542
J	2001	11	nov	3	4	1	6.65194	12.5133	1.34333	67.0097	37.1667	0.981818	5.83333	9.75633
J	2001	12	dec	4	0	0	0.218011	4.85161	-4.07742	64.5753	37.6452	1.7	5.72258	8.61935
J	2002	1	jan	4	0	0	1.72769	5.96129	-2.21613	67.6828	45.8387	5.11667	4.6	7.95968
J	2002	2	feb	4	1	0	2.3747	8.1	-2.54643	59.0089	31.3929	1.71429	6.16786	12.0111
J	2002	3	mar	1	0	0	8.57379	14.6484	2.9	54.6935	25.6774	3.72222	6.9129	15.2839
J	2002	4	apr	1	0	0	14.7907	20.5733	8.83	54.2931	29.9	17.2778	7.15	18.2697
J	2002	5	may	1	0	0	18.1231	23.1032	13.2613	64.5215	40.8387	13.05	6.39355	18.3484
J	2002	6	jun	2	0	0	22.5711	27.4767	17.6167	62.9556	39.3333	5.54	6.94	19.6307
J	2002	7	jul	2	0	0	25.7991	29.2484	22.8935	75.0444	58.2258	9.31875	5.04839	15.5829
J	2002	8	aug	2	0	0	24.5983	27.5032	22.2581	81.6371	67.2258	23.4261	2.2871	10.5835
J	2002	9	sep	3	0	0	20.9994	25.7133	17.02	75.5583	51.9333	6.41667	5.82	14.9187
J	2002	10	oct	3	0	0	12.8591	18.3742	7.9129	70.9328	42.4516	5.65	5.89032	12.3981
J	2002	11	nov	3	0	0	4.89486	9.77333	0.186667	63.9681	38.9667	1.5	5.54	9.75567
J	2002	12	dec	4	0	0	2.41411	6.76452	-1.38387	69.0726	45.6452	3.07143	5.05484	8.10129
J	2003	1	jan	4	0	0	-1.73239	2.63226	-6.04194	65.918	42.871	0.933333	5.02258	9.16355
J	2003	2	feb	4	0	0	2.86518	7.40357	-1.24643	65.0997	41.3214	5.92	5.05	10.8839
J	2003	3	mar	1	0	0	6.8336	11.8097	1.80323	61.5228	35.9355	2.94667	5.57742	14.4165
J	2003	4	apr	1	0	0	13.5387	18.6167	8.78	62.0542	39.0333	16.7308	5.85667	16.0983
J	2003	5	may	1	0	0	19.3699	24.7323	13.7032	63.7406	39.5806	13.2778	7.29677	19.5116
J	2003	6	jun	2	0	0	22.0275	26.12	18.2633	70.2069	51.1333	15.5333	5.01	16.1797
J	2003	7	jul	2	0	0	23.4227	26.4484	20.7516	80.1465	64.6452	22.1654	3.3129	13.29
J	2003	8	aug	2	0	0	24.3804	27.5968	21.7903	80.4032	64.2903	11.5864	3.17742	12.3674
J	2003	9	sep	3	0	0	21.5529	25.6267	18.02	77.9389	56.7667	16.0385	4.06	12.97
J	2003	10	oct	3	0	0	14.0274	19.9516	8.67097	65.7352	35.8387	3.58333	6.89677	14.5577
J	2003	11	nov	3	0	0	9.98903	14.77	5.50333	71.4278	48.4667	2.50769	4.11	7.76967
J	2003	12	dec	4	1	0	2.31949	6.4871	-1.70645	63.6976	40.3871	1.55455	5.05161	7.50419
J	2004	1	jan	4	0	0	-0.461694	4.48065	-4.68387	62.6304	36.9032	0.838462	5.75806	8.65161
J	2004	2	feb	4	0	0	3.54756	9.09655	-1.61034	55.8865	29.2414	2.04	6.64138	11.5172
J	2004	3	mar	1	1	0	6.92325	12.8161	1.20645	50.1962	26.0968	9.24444	7.15161	13.9913
J	2004	4	apr	1	0	0	13.8206	20.2467	7.63	48.7917	24.8667	8.12222	7.87333	19.082
J	2004	5	may	1	0	0	18.5727	23.5258	13.9839	64.5081	43.4516	6.41176	6.09032	18.35
J	2004	6	jun	2	1	0	23.5306	28.78	18.7933	62.575	44.1333	29.5	6.32667	18.3947
J	2004	7	jul	2	0	0	26.0501	29.4194	23.0581	77.0202	61.5161	24.4375	4.32903	14.321
J	2004	8	aug	2	0	0	25.9376	29.6581	22.7452	73.0954	54.6774	10.4368	5.10968	15.6319
J	2004	9	sep	3	0	0	21.4029	25.7333	17.5667	73.4722	50.8	8.91333	5.04667	13.495
J	2004	10	oct	3	6	2	14.7004	20.829	9.15161	63.3777	34.1935	1.66667	6.97419	13.59
J	2004	11	nov	3	2	0	9.06931	14.4033	4.07333	68.4444	42.2	3.71	4.82667	8.49333
J	2004	12	dec	4	0	0	3.1168	8.15484	-1.33226	60.586	35.2581	5.1375	5.99032	8.55677
J	2005	1	jan	4	0	0	-1.44019	2.90323	-5.50968	56.3535	33.7419	0.315789	6.15484	8.90548
J	2005	2	feb	4	0	0	-0.955804	3.35357	-5.01071	52.4003	31.1786	2.5	5.56429	10.7071
J	2005	3	mar	1	0	0	4.675	10.1645	-0.341935	53.2406	26.871	3.23333	7.63226	15.3842
J	2005	4	apr	1	0	0	13.5588	19.5567	7.97667	50.2278	26.5333	4.85	7.51333	17.854
J	2005	5	may	1	1	0	17.3464	23.2387	11.5548	56.9099	32.5484	6.05	7.50645	19.3468
J	2005	6	jun	2	0	0	22.6708	27.3767	18.5833	68.0014	44.8667	19.0545	5.73	16.9303
J	2005	7	jul	2	0	0	25.4038	28.9	22.3742	76.0618	60.0968	24.3842	3.98065	14.2635
J	2005	8	aug	2	0	0	25.1128	28.7677	22.2968	77.9355	60.1935	27.75	4.3871	13.5506
J	2005	9	sep	3	1	0	22.0451	25.9067	18.73	74.1708	56.4667	13.3176	4.39667	12.5107
J	2005	10	oct	3	1	0	14.1523	19.5935	9.30645	71.4704	44.2581	3.38889	5.88065	11.5045
J	2005	11	nov	3	1	0	8.34069	14.25	2.79333	59.4347	31.8667	2.25556	6.41	9.68533
J	2005	12	dec	4	0	0	-2.91089	1.57097	-7.45484	63.2379	39.2903	0.76	5.33226	7.71097
J	2006	1	jan	4	0	0	0.332661	4.87742	-3.65161	65.0605	41.7097	5.2	4.81935	8.49194
J	2006	2	feb	4	0	0	0.948363	5.54643	-3.725	59.8199	33.9286	2.54615	5.63214	11.6193
J	2006	3	mar	1	0	0	6.03723	11.7516	0.587097	51.5941	26.3226	0.736364	6.98065	16.271
J	2006	4	apr	1	1	0	11.6664	16.74	7.12	60.2833	37.6667	7.24615	5.19	15.452
J	2006	5	may	1	0	0	18.4398	23.5613	13.4903	64.039	43	9.20769	6.50645	19.4235
J	2006	6	jun	2	0	0	22.3132	27.1333	17.8533	68.9278	46.8667	11.9091	5.99	19.3167
J	2006	7	jul	2	0	0	23.0535	25.8903	20.7323	85.1909	71.871	19.6667	1.80323	11.3677
J	2006	8	aug	2	0	0	26.7231	31.1806	22.9903	74.7809	54.0968	6.68235	6.25161	18.6323
J	2006	9	sep	3	3	0	19.9728	24.8833	15.4333	69.8875	47.3667	3.0125	6.04667	16.0217
J	2006	10	oct	3	1	0	17.0935	23.3484	11.6	68.5712	40.5484	6.43333	6.80645	13.5416
J	2006	11	nov	3	1	0	8.79528	13.81	3.94333	65.05	40.4	5	4.50667	8.79533
J	2006	12	dec	4	2	0	1.52863	6.58065	-2.65484	70.203	44.9355	3.32222	4.92258	7.74194
J	2007	1	jan	4	0	0	0.365457	5.35484	-3.8	64.8938	38.1613	2	5.14839	8.76677
J	2007	2	feb	4	0	0	4.1872	10.075	-1.04643	59.1518	32.4286	5	6.54643	12.2529
J	2007	3	mar	1	0	0	6.95242	12.1645	2.14516	61.4624	36.871	7.34375	4.83548	12.7861
J	2007	4	apr	1	0	0	11.9525	17.57	6.16667	52.1694	26.8333	3.575	7.23	18.837
J	2007	5	may	1	0	0	18.2685	23.8452	13.0065	61.1949	34.3871	10.0077	7.73871	21.0023
J	2007	6	jun	2	0	0	22.5483	27.1267	18.23	65.8361	46.8333	8.86667	5.46667	18.4113
J	2007	7	jul	2	0	0	24.1789	27.5742	21.2742	76.8884	62.0323	14.5105	3.31935	14.9442
J	2007	8	aug	2	0	0	26.1469	29.8065	23.2226	78.4395	61.0645	18.65	3.94839	14.4952
J	2007	9	sep	3	0	0	21.1981	24.7833	18.18	80.2056	63.8667	27.495	3.17	11.173
J	2007	10	oct	3	0	0	14.7827	20.1	10.4258	71.7016	44.9677	5.925	5.83871	12.8465
J	2007	11	nov	3	2	1	6.58597	12.4933	1.64667	64.85	36.2	1.4	6.40667	10.4527
J	2007	12	dec	4	0	0	2.05954	6.45484	-1.7129	72.6949	51.1613	1.92143	3.47097	6.64161
J	2008	1	jan	4	0	0	-0.891532	3.1129	-4.40645	61.086	37.9032	5.6625	4.70645	8.26194
J	2008	2	feb	4	0	0	-0.908621	4.41034	-5.73448	49.2514	25.5517	1.82	7.3	13.6766
J	2008	3	mar	1	0	0	7.59583	13.3935	2.30645	53.9758	29.4516	2.425	6.55484	15.419
J	2008	4	apr	1	0	0	13.9329	20.0767	7.85	53.204	26.7	3.44	6.78667	18.3187
J	2008	5	may	1	0	0	18.1233	23.8806	12.4968	57.0091	31.9032	7.4	7.53871	21.2084
J	2008	6	jun	2	0	0	21.1132	25.5533	17.15	67.8864	50	11.4077	4.88	17.865
J	2008	7	jul	2	0	0	26.0462	29.6742	23.0452	75.4341	57.5806	14.0778	3.42903	15.6932
J	2008	8	aug	2	0	1	24.5969	28.6323	20.9097	72.3091	53.7097	21.68	6.72581	18.5574
J	2008	9	sep	3	0	0	21.4296	26.31	17.3833	71.7931	47.0333	7.77273	5.68667	15.7447
J	2008	10	oct	3	3	0	15.236	20.9968	10.4774	71	44.6774	2.8	5.8871	12.4087
J	2008	11	nov	3	1	0	7.6	12.9733	2.74	66.2111	40.4333	1.34444	5.05333	9.39433
J	2008	12	dec	4	0	0	1.71815	6.69677	-3	61.4637	39.9032	1.36667	4.96452	7.83323
J	2009	1	jan	4	0	0	-1.69355	4.14839	-6.57097	60.2968	35.0968	1.28333	5.4	9.31419
J	2009	2	feb	4	0	0	3.50714	8.88214	-1.41786	61.3179	34.3929	3.92857	4.45	10.0693
J	2009	3	mar	1	0	0	6.7	12.7258	1.09355	54.1742	26.6774	4.63846	6.63871	15.6958
J	2009	4	apr	1	0	0	12.69	19.3367	6.31	52.4167	25.3667	4.92857	7.37	18.419
J	2009	5	may	1	0	0	18.3387	24.5323	12.1839	57.9032	30.871	12.43	8.03871	20.9877
J	2009	6	jun	2	0	0	22.07	27.39	16.85	63.0533	37.6667	7.275	7.37333	21.2093
J	2009	7	jul	2	0	0	22.9419	27.0806	19.5161	76.2613	55.4839	20.4381	3.99355	15.2874
J	2009	8	aug	2	0	0	24.4839	28.7355	20.671	71.3032	50.6129	14.83	5.83871	17.9258
J	2009	9	sep	3	0	0	21.4067	26.6067	16.9867	68.48	42.3333	7.66667	6.59	16.4973
J	2009	10	oct	3	1	0	15.5806	22.2548	10.0774	63.9935	32	4.11667	7.48065	14.199
J	2009	11	nov	3	1	0	7.44667	11.9367	3.57	66.65	44.3333	6.07778	3.93333	7.94933
J	2009	12	dec	4	0	0	0.158065	4.77742	-4.01935	65.8258	40.6774	2.12222	4.47419	7.53806
G	2001	1	jan	4	0	0	0.120833	4.33226	-3.53226	60.871	41.129	2.29091	4.22903	9.25581
G	2001	2	feb	4	0	0	2.46101	7.67143	-2.16429	55.5789	31.9286	7.62727	4.98929	12.3414
G	2001	3	mar	1	1	0	6.30538	11.871	1.43871	55.3495	31.7097	1.79333	5.19677	15.9055
G	2001	4	apr	1	1	0	13.4394	20.3567	6.92667	52.0125	26.9	6.24286	6.80333	20.562
G	2001	5	may	1	1	0	19.194	24.5935	14.4839	59.828	37.7097	2.14	6.09677	20.2732
G	2001	6	jun	2	0	0	22.3317	26.5867	18.8	70.1444	52.6	16.3867	3.59	15.0667
G	2001	7	jul	2	0	0	26.3374	30.2097	23.2065	73.5309	57.3548	13.54	5.13871	17.7487
G	2001	8	aug	2	0	0	26.2128	30.571	22.6935	71.2151	51.7742	5.95789	5.66129	17.7055
G	2001	9	sep	3	2	0	22.3243	27.6633	17.7333	64.1222	41	16.9125	6.70667	17.7813
G	2001	10	oct	3	3	3	16.5871	21.7129	12.3839	69.8562	45.3548	5.80833	4.84194	12.5068
G	2001	11	nov	3	6	1	8.015	13.5333	3.28333	62.3417	37.1667	1.53	5.49667	11.0807
G	2001	12	dec	4	1	0	2.45242	6.40645	-0.877419	61.7366	42.2258	3.56667	4.08387	8.72935
G	2002	1	jan	4	1	0	2.88992	6.81935	-0.580645	68.7325	48.4516	5.31667	3.74194	8.53645
G	2002	2	feb	4	0	0	3.31399	9.00357	-1.47143	55.7009	32.2857	2.25	5.55	13.1557
G	2002	3	mar	1	0	0	8.69731	14.8742	3.07742	55.7325	29.6129	3.875	5.42903	15.5542
G	2002	4	apr	1	0	1	14.4151	19.99	9.16667	59.1306	35.6667	9.81667	5.43	17.5763
G	2002	5	may	1	0	0	18.0972	23.0839	13.5677	66.4449	43.9355	5.28947	4.6	16.631
G	2002	6	jun	2	0	0	22.5189	27.77	17.9867	63.2444	40.8333	9.04167	6.18	20.2623
G	2002	7	jul	2	0	0	25.4082	29.1387	22.5032	74.7567	58.1935	8.57143	3.61613	15.0065
G	2002	8	aug	2	1	0	24.741	27.8968	22.3484	80.9449	67.1613	26.5455	2.45161	11.3552
G	2002	9	sep	3	0	6	21.5112	26.7067	17.4233	70.8069	48.5667	9.90909	5.28333	15.5427
G	2002	10	oct	3	7	4	14.4437	20.0645	9.60968	65.2957	40.3871	2.75714	5.52581	13.4671
G	2002	11	nov	3	9	1	6.31944	11.0033	1.61	61.2597	40.4667	2.62308	4.51	10.225
G	2002	12	dec	4	1	0	4.05645	8.46774	0.177419	64.6828	45.1613	1.79412	3.91935	8.89161
G	2003	1	jan	4	0	0	-0.455511	3.65484	-4.16774	66.9435	49.3226	3.21429	3.98065	9.35677
G	2003	2	feb	4	0	0	3.86086	8.63571	-0.317857	63.7321	42.0714	4.74545	4.58214	11.6629
G	2003	3	mar	1	1	0	7.08683	12.0613	2.54194	61.4315	39.2903	5.43077	5.43548	15.1903
G	2003	4	apr	1	0	0	13.8256	18.7933	9.41	63.75	39.0667	17.4214	5.81667	16.049
G	2003	5	may	1	0	0	19.0797	24.2258	14.3677	67.4274	44.5484	10.0714	5.7871	17.8216
G	2003	6	jun	2	1	1	21.6432	25.72	17.9467	70.5417	50.7667	13.6545	4.37667	15.9257
G	2003	7	jul	2	1	0	22.9907	26.0355	20.5839	83.7177	69.3871	20.9222	1.96452	10.8732
G	2003	8	aug	2	1	0	24.2425	27.7	21.3387	79.8656	63.6774	24.1765	3.71613	13.6942
G	2003	9	sep	3	1	3	22.0106	26.27	18.27	75.2125	53.8	14.7357	5.54667	14.3063
G	2003	10	oct	3	6	3	14.6745	19.9774	9.94194	64.6546	39.0323	6.03333	7.18065	13.9494
G	2003	11	nov	3	5	1	11.0171	15.3967	6.99	70.9431	52.0667	2.4	4.39667	8.31067
G	2003	12	dec	4	1	0	3.13024	6.91935	-0.383871	66.9019	46.0968	2.15	4.77097	8.1171
G	2004	1	jan	4	0	0	0.071371	4.67742	-3.57097	67.0914	44.0968	1	5.48387	9.37613
G	2004	2	feb	4	0	0	3.89152	9.39655	-0.913793	61.3951	34.1034	4.15385	6.34483	12.5183
G	2004	3	mar	1	0	0	7.59462	13.6548	2.3	52.4731	27.9677	3.84	6.94516	15.9439
G	2004	4	apr	1	0	0	13.6401	20.0433	7.43	54.0653	28.6667	7.07778	7.32333	18.5197
G	2004	5	may	1	0	0	18.1765	22.9	13.7323	67.8427	45.9032	5.94706	5.42258	16.8658
G	2004	6	jun	2	0	0	22.575	27.1933	18.5133	68.4194	49.5667	13.9818	5.16	16.4873
G	2004	7	jul	2	0	0	26.1102	29.9226	23.1613	76.6667	59.5161	22.75	4.96774	16.3703
G	2004	8	aug	2	1	0	26.2664	30.6452	22.7613	73.6075	55.0645	33.5588	5.8129	16.73
G	2004	9	sep	3	1	2	22.0619	26.3367	18.81	73.7167	54.4333	15.125	4.26	12.9027
G	2004	10	oct	3	3	5	15.853	21.6226	10.8968	60.6089	35.129	0.68	7.72903	15.1784
G	2004	11	nov	3	0	1	10.179	15.65	5.36667	70.8764	42.6333	6.31	5.70667	10.002
G	2004	12	dec	4	0	0	4.85067	9.48387	0.951613	61.5605	40.5161	3.2	5.23548	8.32968
G	2005	1	jan	4	0	0	0.0350806	3.59677	-3.20323	64.961	44.4516	0.504762	4.70645	8.83419
G	2005	2	feb	4	0	0	0.576637	4.61071	-2.775	64.6875	43.75	3.22	5.11071	11.0025
G	2005	3	mar	1	0	0	5.25968	10.8452	0.754839	61.1532	34.2258	5.55833	6.75806	16.2055
G	2005	4	apr	1	0	0	14.1772	20.6033	8.55333	56.7292	30.4667	9.25	8.13333	19.5777
G	2005	5	may	1	0	0	18.3552	24.471	12.971	61.6344	36.5806	7.41	7.77097	22.4103
G	2005	6	jun	2	2	0	23.67	28.4967	19.8233	72.5375	49.7	18.5	6.31	19.9497
G	2005	7	jul	2	0	0	26.2206	30.3323	23.1032	79.6452	61.1613	15.2111	4.1129	16.5574
G	2005	8	aug	2	2	0	26.105	29.9935	23.0419	78.6599	61	15.9632	4.52258	16.2774
G	2005	9	sep	3	2	0	23.4383	27.31	20.0867	75.5139	57.8333	8.34615	4.28333	14.3677
G	2005	10	oct	3	10	1	15.732	20.7742	11.2161	68.1478	42.4839	2.175	5.90968	13.9365
G	2005	11	nov	3	2	2	10.1535	15.19	5.43	61.3556	36.7333	3.89091	6.08667	11.674
G	2005	12	dec	4	1	0	-0.621774	3.31613	-4.12903	70.5	51.1935	3.91765	4.75484	9.38548
G	2006	1	jan	4	0	0	2.56667	6.49677	-0.896774	63.6653	43.4839	2.3	4.51935	9.67
G	2006	2	feb	4	0	0	2.49301	7.16786	-1.79286	61.4449	37.3214	3.46	5.18214	12.6896
G	2006	3	mar	1	0	0	7.20296	12.8871	2.12903	55.9113	29.4839	1.5	7.0129	17.6639
G	2006	4	apr	1	0	0	12.1371	17.19	7.57667	64.6458	41.5667	6.27143	5.58667	17.3967
G	2006	5	may	1	0	0	18.3737	23.4065	13.8677	70.1102	46.6452	15.7154	5.47097	18.8597
G	2006	6	jun	2	0	0	22.5944	27.2433	18.6067	70.5028	47.5	22.67	6.28333	20.2433
G	2006	7	jul	2	0	0	24.443	27.3484	22.2161	84.1089	71.0968	19.9292	1.92903	12.459
G	2006	8	aug	2	0	2	27.0077	31.3613	23.8806	76.2849	56.6452	16.4167	5.86129	18.3774
G	2006	9	sep	3	1	1	20.4576	24.9767	16.4667	69.8764	49	4.68	5.53333	16.0797
G	2006	10	oct	3	7	0	18.1629	24.0419	13.3968	66.2446	38.3871	2.275	7.13548	15.1942
G	2006	11	nov	3	4	0	10.9532	15.4467	6.76667	62.1361	40.8	3.79091	4.82333	10.072
G	2006	12	dec	4	1	0	3.62755	7.8	-0.0193548	70.1519	48.5161	3.15833	4.73226	7.2471
G	2007	1	jan	4	0	0	2.38858	6.5871	-1.04839	64.2191	43.0323	1.21	4.60645	8.47258
G	2007	2	feb	4	0	0	5.79955	11.25	1.17143	63.1726	37.3929	9.8875	6.54643	12.705
G	2007	3	mar	1	0	0	8.3371	13.5	3.78065	62.1855	38.3548	6.68667	5.16129	14.3981
G	2007	4	apr	1	0	0	12.4507	18.1267	7.42	57.1194	30.5667	3.51818	7.06667	19.0983
G	2007	5	may	1	0	0	18.8462	24.4387	14.0645	62.957	36	12.8889	7.42258	21.5939
G	2007	6	jun	2	1	0	22.8717	27.1067	19.3467	71.6625	52.9667	3.25	3.97	16.243
G	2007	7	jul	2	1	0	25.0298	28.4452	22.2677	78.5565	62.4839	13.6471	3.17419	14.9106
G	2007	8	aug	2	0	0	26.9165	30.3419	24.2	79.004	62.5161	16.1571	4.32903	15.3706
G	2007	9	sep	3	1	1	22.3336	25.65	19.5567	82.1028	65.4	24.535	3.47667	11.9053
G	2007	10	oct	3	5	1	16.2989	21.2742	12.1226	68.6505	43.2581	10.6111	6.1871	14.4826
G	2007	11	nov	3	5	0	9.00056	14.2	4.46667	62.0806	38.2667	0.471429	6.07	11.0017
G	2007	12	dec	4	0	0	4.91559	8.64194	1.54839	70.914	51.2581	3.85	3.35161	7.16
G	2008	1	jan	4	1	0	1.21505	4.7129	-1.68387	65.672	46.7097	4.06429	4.31935	7.91903
G	2008	2	feb	4	0	0	1.01063	5.72414	-2.84138	53.4612	30.8966	1.2	7.08276	13.3493
G	2008	3	mar	1	0	0	8.54973	14.4323	3.79355	58.0551	31.129	3.35455	6.53548	15.109
G	2008	4	apr	1	0	0	14.4929	20.3433	9.26	58.7042	32.4	5.42	6.19	17.7747
G	2008	5	may	1	0	0	18.7161	24.3548	13.5484	61.4624	37	12.55	7.00645	19.9319
G	2008	6	jun	2	0	0	22.1679	26.18	18.8167	71.6958	54.9333	17.075	3.22667	14.7887
G	2008	7	jul	2	0	0	27.2874	30.9968	24.5387	75.0202	59.3226	6.62857	4.45484	16.6703
G	2008	8	aug	2	1	0	26.3159	30.2258	22.9581	71.4328	52.6452	9.26471	5.68065	17.2884
G	2008	9	sep	3	1	0	23.6929	28.0967	19.8167	68.7633	47.3933	4.20714	5.23333	14.7503
G	2008	10	oct	3	1	1	17.7692	23.1774	13.1516	63.5437	38.4355	2.55	6.36774	12.9823
G	2008	11	nov	3	0	0	9.75264	14.6933	5.51333	66.0528	42.8333	3.25833	5.34	9.61033
G	2008	12	dec	4	0	0	4.08199	8.42581	-0.177419	64.5148	46.0645	1.45	4.83548	7.8229
G	2009	1	jan	4	0	0	1.09677	5.99032	-2.90323	67.2903	43.871	2.57143	5.09355	8.91097
G	2009	2	feb	4	0	0	5.75357	10.9679	1.26071	63.9143	37.8929	7.98889	4.26786	10.0754
G	2009	3	mar	1	0	0	8.25161	14.4742	3.13871	58.3613	31.871	4.21	6.14516	15.1816
G	2009	4	apr	1	0	0	13.8667	20.99	8.02667	55.1367	28.0667	5.1	7.59	19.264
G	2009	5	may	1	1	0	19.6935	26.5226	13.9	57.2226	29.5806	10.4455	8.18065	21.0074
G	2009	6	jun	2	1	0	23.3633	28.9367	18.9	66.24	42.7	16.4636	6.47333	19.2743
G	2009	7	jul	2	0	0	24.8323	28.8742	21.7774	81.8355	62.3548	24.296	2.90645	12.4932
G	2009	8	aug	2	1	0	26.0613	30.6032	22.5935	74.6871	53.5484	14.6167	4.63548	15.2268
G	2009	9	sep	3	0	2	22.7367	27.9533	18.5667	69.7867	46.2333	2.05455	6.13	15.4917
G	2009	10	oct	3	4	0	17.3323	23.5871	12.3355	62.7065	33.7742	4.525	7.4	14.2323
G	2009	11	nov	3	1	1	9.72333	14.8067	5.81667	66.0733	44.3667	2.96667	4.63667	8.84467
G	2009	12	dec	4	0	0	2.79355	7.11613	-0.76129	67.8323	45.5806	2.80556	4.50323	7.27452
G	2001	1	jan	4	2	0	-2.22505	2.22434	-6.43812	58.5248	39.3695	4.47716	4.91877	7.46145
G	2001	2	feb	4	2	0	0.92826	6.11656	-3.91818	57.9217	37.2662	7.66984	5.99221	9.98464
G	2001	3	mar	1	0	1	5.42619	11.4487	-0.296188	51.2936	29.651	1.34492	7.39648	13.6929
G	2001	4	apr	1	0	0	12.5586	19.44	5.24697	50.8053	27.5788	3.74674	9.57667	17.7685
G	2001	5	may	1	1	0	18.1123	24.115	12.2419	58.5718	37.0557	4.15854	9.16598	16.9029
G	2001	6	jun	2	0	0	21.5046	26.4009	17.2142	68.8105	50.8909	18.4737	7.54667	14.6948
G	2001	7	jul	2	2	0	25.1828	29.9663	21.1211	74.5387	57.1877	10.4554	8.10029	16.5713
G	2001	8	aug	2	1	0	24.6117	29.5493	20.4504	72.9018	53.5894	5.07667	7.70088	15.1065
G	2001	9	sep	3	2	2	19.7022	25.1645	14.9206	70.458	49.4061	13.1276	7.06333	13.1942
G	2001	10	oct	3	11	1	14.7633	20.1293	10.3962	72.9737	50.7918	9.76332	5.51701	9.76387
G	2001	11	nov	3	11	3	6.19042	12.6661	0.880303	60.1309	34.7182	2.07515	6.77545	10.0403
G	2001	12	dec	4	5	0	0.134905	5.33216	-4.30322	54.3642	33.2778	2.81193	6.01906	8.91968
G	2002	1	jan	4	2	0	0.710181	5.05941	-3.32446	60.8411	43.2957	6.34112	5.5621	8.63629
G	2002	2	feb	4	2	0	2.13434	8.30744	-3.30714	52.2436	29.5833	0.332113	7.20863	12.5729
G	2002	3	mar	1	3	0	7.61622	13.7239	1.69973	53.9648	30.4059	4.50392	7.08898	14.1929
G	2002	4	apr	1	0	0	12.8295	18.9714	6.53917	55.5524	34.5056	17.9053	7.37417	16.3397
G	2002	5	may	1	2	0	16.1456	21.5153	10.8409	66.1933	44.6452	9.62028	7.0586	17.0311
G	2002	6	jun	2	0	0	20.4984	26.1608	14.8644	64.7545	42.9361	4.16081	8.29472	19.2295
G	2002	7	jul	2	0	0	24.0873	28.093	20.6602	75.3551	60.2473	11.0624	5.61478	14.2465
G	2002	8	aug	2	1	0	23.1978	26.5909	20.5075	79.5631	67.121	26.952	3.80914	11.4903
G	2002	9	sep	3	2	6	19.0483	24.3406	14.7058	74.7418	53.775	8.53314	5.81611	12.6468
G	2002	10	oct	3	8	4	12.0217	17.9648	6.92984	67.7986	43.4624	4.53204	6.31909	11.9248
G	2002	11	nov	3	6	2	4.15582	9.75889	-1.08056	55.6767	33.3361	0.986154	6.45083	10.573
G	2002	12	dec	4	4	0	1.78709	6.34758	-2.17204	64.3943	45.0833	3.86895	4.79489	7.69629
G	2003	1	jan	4	0	0	-2.12833	2.87661	-6.78575	58.0074	37.7715	3.06613	6.02661	9.64419
G	2003	2	feb	4	0	0	1.7588	6.53512	-2.54256	66.0743	44.4464	5.4501	5.54256	10.1954
G	2003	3	mar	1	0	0	5.58604	10.7968	0.481989	64.1141	40.8817	4.17623	5.91478	12.4768
G	2003	4	apr	1	1	0	12.025	17.5794	6.62028	64.5635	42.4694	15.0186	6.42611	14.7445
G	2003	5	may	1	3	0	16.4621	22.2855	10.8981	69.9	47.836	17.3211	6.9664	16.3953
G	2003	6	jun	2	1	0	20.4214	25.0628	16.3292	73.6861	54.7222	16.0148	6.08833	15.7563
G	2003	7	jul	2	1	0	21.4711	24.9105	18.6661	80.9271	67.8602	18.9161	3.66882	10.6416
G	2003	8	aug	2	0	0	23.1551	27.0398	20.0798	79.7032	64.3118	14.148	4.24973	10.9639
G	2003	9	sep	3	2	6	20.1136	24.5497	16.4481	76.8366	59.2	15.882	4.54722	9.9205
G	2003	10	oct	3	7	0	12.6147	19.3202	7.12957	63.1839	37.1371	3.40822	7.42258	12.7105
G	2003	11	nov	3	9	0	9.19052	14.3742	4.53111	69.4743	49.0944	6.21702	4.32833	7.20317
G	2003	12	dec	4	4	0	1.75735	6.68414	-2.71828	54.9435	34.3333	2.52929	5.98091	8.67194
G	2004	1	jan	4	0	0	-1.20475	4.27124	-5.90833	55.6368	34.3199	2.04074	6.50161	9.43887
G	2004	2	feb	4	1	0	2.53477	8.58563	-3.10316	51.6031	28.6178	2.35737	7.43103	12.3091
G	2004	3	mar	1	0	0	6.15783	12.3202	0.0379032	51.1942	28.4274	3.82222	7.55995	14.6821
G	2004	4	apr	1	2	0	13.1131	19.9594	6.30611	49.7288	26.4361	10.2261	8.23417	17.1535
G	2004	5	may	1	1	0	17.3049	22.5355	12.1027	65.9786	45.2715	5.85352	6.54005	15.5308
G	2004	6	jun	2	0	0	21.326	26.8197	16.0669	67.4566	47.9139	22.7622	6.87167	16.7897
G	2004	7	jul	2	1	0	25.0589	29.4089	21.461	77.5345	60.922	17.4603	5.76613	14.6395
G	2004	8	aug	2	1	0	24.1954	28.6422	20.6852	77.0308	59.6747	19.1518	5.59435	12.9865
G	2004	9	sep	3	1	3	19.9213	24.7328	15.9469	76.9694	57.3917	10.2048	4.76944	11.0673
G	2004	10	oct	3	7	4	13.4154	20.0449	7.49866	67.2145	41.6694	1.08889	6.72527	11.311
G	2004	11	nov	3	8	0	8.42336	14.7533	2.97111	66.2299	41.4056	5.14321	6.1575	9.294
G	2004	12	dec	4	4	0	2.51543	8.16586	-2.34516	60.598	36.8441	3.5242	5.80457	8.06419
G	2005	1	jan	4	0	0	-1.31595	3.64274	-5.97957	53.1836	32.6317	2.86837	6.53925	9.41048
G	2005	2	feb	4	0	0	-0.909313	3.85119	-5.5253	52.8085	33.6131	3.26569	6.09137	10.6568
G	2005	3	mar	1	1	0	4.67091	10.4511	-0.797581	55.9334	32.6022	5.04304	7.66828	14.9513
G	2005	4	apr	1	2	0	13.1689	19.8511	6.28194	53.706	29.9639	6.08277	7.95972	16.8753
G	2005	5	may	1	0	0	16.677	22.9632	10.5522	62.2528	38.2581	7.20195	8.43145	18.7471
G	2005	6	jun	2	1	0	22.2167	27.5047	17.5033	73.1726	51.9944	11.6724	7.24139	17.6717
G	2005	7	jul	2	0	1	24.5546	28.5933	21.1492	79.6106	63.5833	16.0871	5.46452	14.6873
G	2005	8	aug	2	2	0	24.5974	29.0707	21.1323	79.5334	62.1398	14.993	5.35161	14.5406
G	2005	9	sep	3	0	0	20.7306	25.1111	17.14	79.734	61.9556	10.6034	4.39278	11.062
G	2005	10	oct	3	3	1	13.7314	19.5358	8.89597	72.9892	48.4812	2.53208	5.26344	10.0992
G	2005	11	nov	3	11	2	7.5328	14.1067	1.73222	60.9084	35.55	1.9272	6.65472	9.80317
G	2005	12	dec	4	4	0	-2.66882	2.49973	-7.46694	52.695	33.129	0.596498	6.43333	9.06032
G	2006	1	jan	4	2	0	0.166622	5.22796	-4.26022	60.7484	40.7876	5.71121	5.09247	7.70887
G	2006	2	feb	4	1	0	1.10433	6.00149	-3.60149	58.4149	37.3899	2.85877	6.12113	10.6862
G	2006	3	mar	1	0	0	5.84648	11.8978	0.0174731	52.385	29.0161	1.27388	7.5914	14.2545
G	2006	4	apr	1	0	0	11.1152	16.7194	5.75667	60.6539	39.9361	8.40067	5.63806	13.3007
G	2006	5	may	1	1	0	16.9897	22.4954	11.7046	67.5199	45.5161	10.3075	6.47177	15.3761
G	2006	6	jun	2	0	0	21.1625	26.5125	16.3303	71.898	50.2139	6.73046	6.94444	16.62
G	2006	7	jul	2	1	0	22.5698	25.9301	20.122	85.8105	71.9731	24.6186	2.50726	9.7921
G	2006	8	aug	2	2	0	26.0525	30.9038	22.1282	77.4929	56.543	9.52126	7.18737	16.1273
G	2006	9	sep	3	3	3	18.6996	24.1125	14.1281	76.6817	52.45	7.22699	5.98472	12.6613
G	2006	10	oct	3	13	4	16.1698	22.8642	10.7565	74.0819	44.5054	6.36984	6.64328	11.7102
G	2006	11	nov	3	8	1	8.0839	13.5681	3.21722	67.6045	43.4972	4.25505	4.68	7.86617
G	2006	12	dec	4	1	0	1.41722	7.0043	-3.18118	64.8109	40.8575	2.3922	5.23468	7.58113
G	2007	1	jan	4	3	0	0.821752	6.45161	-3.84059	58.7454	34.9516	0.773788	5.61747	8.31097
G	2007	2	feb	4	1	0	3.87717	10.0679	-1.55208	62.2984	35.9762	5.21346	6.58988	10.4057
G	2007	3	mar	1	0	0	6.48735	11.9876	1.62903	63.858	40.8441	6.48636	5.56048	12.3815
G	2007	4	apr	1	1	0	11.6662	17.6372	5.59111	57.2435	32.1167	2.8768	7.07222	16.7555
G	2007	5	may	1	0	0	17.4916	23.5683	11.7909	64.4979	38.3683	8.43312	7.47392	18.4026
G	2007	6	jun	2	2	0	21.1995	26.2353	16.3892	72.8632	51.5972	10.9531	5.81194	17.011
G	2007	7	jul	2	0	0	22.9214	26.6054	19.8366	82.9311	66.9435	12.1294	3.9172	13.5553
G	2007	8	aug	2	1	0	25.501	29.7618	22.1376	82.2334	63.3226	12.7926	4.88952	14.2974
G	2007	9	sep	3	3	6	20.7761	24.5278	17.7436	84.2181	67.6222	18.8982	3.05972	9.67083
G	2007	10	oct	3	7	7	14.5295	20.2755	9.82043	75.4554	49.4194	2.58026	4.99812	10.1482
G	2007	11	nov	3	14	2	6.63391	13.2731	1.02361	63.6653	37.2028	1.99251	6.43361	9.449
G	2007	12	dec	4	3	3	2.17912	6.96801	-1.90269	66.0818	45.4435	2.69607	4.46801	7.20952
G	2008	1	jan	4	1	0	-0.188566	4.22634	-4.14516	62.6952	41.6532	5.14307	4.83871	8.64177
G	2008	2	feb	4	0	1	-0.379406	5.32787	-5.74655	46.8212	25.7098	0.869385	7.58592	14.2388
G	2008	3	mar	1	0	0	6.72717	12.7008	1.15376	62.8714	37.6989	5.08763	6.17043	14.8077
G	2008	4	apr	1	0	0	12.7493	19.0083	6.4275	60.8698	35.3528	4.86859	6.94528	18.7632
G	2008	5	may	1	1	0	17.4924	23.4659	11.3691	61.9091	36.2661	7.37384	7.39167	21.0145
G	2008	6	jun	2	2	0	19.9361	24.4461	15.6669	74.3723	55.1333	13.1534	4.95167	17.9237
G	2008	7	jul	2	2	0	26.0511	30.5099	22.4089	78.3922	59.2554	11.8682	4.85645	18.8435
G	2008	8	aug	2	1	0	23.8784	28.4161	19.9331	78.6703	58.9032	13.8311	6.25511	18.5523
G	2008	9	sep	3	0	8	20.6105	25.9297	16.2014	77.9561	53.125	5.64698	5.34306	14.894
G	2008	10	oct	3	15	5	15.0496	21.3387	9.79704	71.6719	43.9425	4.62707	6.54005	13.4766
G	2008	11	nov	3	7	2	7.23793	12.8772	2.27083	65.7425	41.6333	1.72226	5.0275	9.467
G	2008	12	dec	4	2	0	1.34331	7.08468	-3.57151	59.9446	37.2903	1.94558	5.73925	9.12839
G	2009	1	jan	4	1	0	-1.55953	4.75513	-7.08974	53.6589	30.0762	1.33232	5.83372	9.97952
G	2009	2	feb	4	0	0	4.10617	10.0101	-1.42597	59.624	33.3117	3.85853	4.90649	10.9207
G	2009	3	mar	1	0	0	6.9824	13.117	0.902346	54.5358	28.9736	4.33179	6.25308	15.7473
G	2009	4	apr	1	3	1	12.8615	20.04	5.89879	53.1167	27.9182	4.97858	7.38545	19.1442
G	2009	5	may	1	0	0	18.2282	25.2504	11.7745	60.3622	32.39	10.5498	7.67097	21.0637
G	2009	6	jun	2	2	0	21.8261	27.7036	16.4561	66.6964	42.3879	6.42538	6.58303	20.0485
G	2009	7	jul	2	2	1	23.0117	27.6991	19.3716	79.3358	59.1173	16.9035	3.71173	15.1368
G	2009	8	aug	2	2	0	23.5683	28.2859	19.6818	76.3824	55.8504	9.43644	4.67889	16.1027
G	2009	9	sep	3	2	2	20.2391	26.2676	15.3836	74.8133	48.3121	8.67444	5.75364	15.3118
G	2009	10	oct	3	6	0	14.4252	21.9443	8.25601	66.4463	34.2727	2.62357	7.24106	14.4911
G	2009	11	nov	3	7	0	7.21303	12.7715	2.50667	64.7915	42.4576	5.60092	4.55576	8.93617
G	2009	12	dec	4	1	1	0.538123	5.99003	-4.0393	56.1185	33.607	5.24787	5.41232	8.95306
Y	2001	1	jan	4	2	1	-5.10918	-0.316043	-9.82888	62.7108	40.3316	3.04349	4.65376	8.3186
Y	2001	2	feb	4	1	0	-1.39159	3.5619	-5.91131	64.026	41.2619	5.07694	5.39583	10.742
Y	2001	3	mar	1	0	0	3.97518	9.68333	-1.21935	55.3858	30.9355	1.25582	6.62258	14.826
Y	2001	4	apr	1	0	0	12.2658	19.1075	5.63763	51.6044	26.9889	10.088	8.075	18.6821
Y	2001	5	may	1	0	0	18.2283	24.275	12.8681	61.0255	35.8602	2.99794	7.78011	19.3319
Y	2001	6	jun	2	1	0	21.9168	26.651	17.9238	72.0109	53.7708	14.2511	5.52611	15.3077
Y	2001	7	jul	2	0	0	25.2154	29.2963	21.9212	80.5708	63.0926	25.2076	5.10054	14.6587
Y	2001	8	aug	2	0	3	25.472	30.4954	21.2535	73.2363	50.5748	9.7475	7.94194	18.5918
Y	2001	9	sep	3	4	3	20.7737	27.0262	15.1662	65.511	40.351	3.21731	7.78389	16.2876
Y	2001	10	oct	3	16	3	14.6868	20.5479	10.0484	73.8063	47.8	7.49152	5.5328	10.9426
Y	2001	11	nov	3	19	3	5.06409	11.1081	-0.0966667	67.3266	39.7751	1.87585	5.82278	8.90178
Y	2001	12	dec	4	3	0	-2.02189	3.46452	-6.95253	58.2062	33.1751	1.65974	6.31183	8.29129
Y	2002	1	jan	4	1	0	-1.1553	3.29401	-5.47696	66.0685	46.1889	3.77503	5.153	7.98688
Y	2002	2	feb	4	0	0	0.803614	6.57245	-4.22347	59.1571	32.898	0.378793	6.19286	10.852
Y	2002	3	mar	1	0	0	6.7105	12.8382	1.01198	57.4846	30.3594	3.43855	6.65991	14.012
Y	2002	4	apr	1	2	0	12.9223	19.0967	6.7381	56.5282	31.6286	19.4956	7.79714	17.9134
Y	2002	5	may	1	3	0	17.0875	23.1548	11.6493	64.5808	39.8756	7.17597	7.55161	19.0991
Y	2002	6	jun	2	4	1	21.0513	26.7252	15.8824	65.6407	41.0286	7.76329	8.09952	19.7404
Y	2002	7	jul	2	2	0	24.5433	28.5816	21.1134	76.7429	60.5622	14.958	5.51843	16.0044
Y	2002	8	aug	2	0	1	23.63	27.2138	20.8304	81.9405	67.0369	22.6666	3.24286	10.8054
Y	2002	9	sep	3	1	2	20.0422	25.6376	15.6214	74.4617	50.581	4.46636	5.98524	14.1714
Y	2002	10	oct	3	15	4	11.3331	17.3037	6.31244	68.3644	40.5806	5.83114	6.39309	12.0519
Y	2002	11	nov	3	16	0	2.53133	7.54857	-2.29	60.605	37.6619	1.12573	5.33524	8.51356
Y	2002	12	dec	4	2	0	-0.0316244	4.84793	-4.36912	66.557	44.0184	1.78531	4.75438	6.86258
Y	2003	1	jan	4	1	0	-4.34295	0.57788	-8.95069	65.8243	43.6313	1.71386	5.29447	7.73946
Y	2003	2	feb	4	0	1	0.841667	6.03367	-3.73112	67.6173	43.3724	3.6876	5.16684	9.75143
Y	2003	3	mar	1	2	0	5.22264	10.6576	0.240553	62.7828	38.1382	2.56951	5.75023	12.9575
Y	2003	4	apr	1	1	0	12.0749	17.9119	6.71333	62.9722	39.8238	14.1162	5.82857	14.3589
Y	2003	5	may	1	6	0	18.2722	24.7829	12.2516	62.9645	37.4101	15.3723	7.78203	18.3468
Y	2003	6	jun	2	2	0	20.9773	25.5933	16.9362	72.9909	53.819	12.8303	5.25333	14.3689
Y	2003	7	jul	2	4	0	23.4162	27.4608	19.9433	78.6776	61.9171	17.1995	4.60092	12.9209
Y	2003	8	aug	2	0	0	23.6188	27.57	20.6074	81.495	64.6866	21.2043	3.79908	11.0745
Y	2003	9	sep	3	1	1	20.0491	24.699	16.36	78.7558	57.8857	25.0766	4.72476	11.7113
Y	2003	10	oct	3	14	1	12.2918	18.8161	6.7424	67.2277	37.2719	4.88132	6.81659	12.2245
Y	2003	11	nov	3	16	0	8.08252	13.051	3.59381	70.1847	48.4048	4.38893	4.12238	6.59611
Y	2003	12	dec	4	14	0	-0.625211	4.14654	-5.00876	63.2496	40.1198	1.31913	5.58203	7.00409
Y	2004	1	jan	4	5	0	-3.34608	1.93779	-7.99447	64.9967	39.1567	2.10298	6.00829	8.05398
Y	2004	2	feb	4	0	0	1.11195	6.82709	-4.08227	58.0417	30.8867	4.53904	6.79015	11.1352
Y	2004	3	mar	1	0	0	5.05236	11.1452	-0.729954	52.1534	26.576	3.65673	7.3023	15.4577
Y	2004	4	apr	1	0	0	11.8638	18.5533	5.58905	54.7629	28.5952	8.72817	7.5581	17.7579
Y	2004	5	may	1	3	1	16.7902	21.9378	12.0811	68.8147	46.6959	8.38514	5.96129	16.1833
Y	2004	6	jun	2	3	1	22.1107	27.3943	17.3714	68.0562	46.9667	11.6839	6.02952	16.3842
Y	2004	7	jul	2	2	2	24.1202	27.5627	21.3848	83.3583	68.8341	20.7094	3.27512	11.8746
Y	2004	8	aug	2	1	3	24.9193	29.582	21.2401	75.2164	56.1106	14.035	5.67834	15.7711
Y	2004	9	sep	3	5	1	20.4124	25.8305	15.9881	74.5157	48.9905	15.1011	5.9481	13.9742
Y	2004	10	oct	3	6	2	13.2814	20.7129	7.08479	63.8867	32.4747	2.025	7.91198	13.9292
Y	2004	11	nov	3	11	0	7.49962	13.5	2.47095	71.3274	42.9095	6.7688	5.16905	7.83056
Y	2004	12	dec	4	6	0	0.686118	6.29171	-4.1894	62.4852	36.0968	3.36165	6.19954	7.71484
Y	2005	1	jan	4	1	0	-3.39242	2.18756	-8.53364	55.9418	32.2949	0.459382	6.40783	9.24462
Y	2005	2	feb	4	1	0	-2.48267	2.75918	-7.50459	52.1569	29.5663	3.81102	6.42806	12.1443
Y	2005	3	mar	1	1	0	3.73452	9.69401	-1.62903	57.5816	31.0783	2.90203	7.77327	16.519
Y	2005	4	apr	1	1	0	12.4821	18.9257	6.4181	56.9887	30.1857	7.50435	7.42667	18.495
Y	2005	5	may	1	1	1	16.9121	23.2599	10.8862	61.9545	35.6682	9.175	8.29539	20.8984
Y	2005	6	jun	2	0	0	22.2286	27.2229	18.081	74.4028	52.3571	14.2984	5.71524	17.8168
Y	2005	7	jul	2	1	0	24.909	28.7894	21.8687	81.3418	65.4194	17.1726	4.18203	15.1616
Y	2005	8	aug	2	0	0	24.6155	28.7106	21.5691	80.0507	63.3779	16.7124	4.33687	14.1475
Y	2005	9	sep	3	1	3	21.1456	25.6348	17.4667	76.1804	56.319	22.9524	5.0419	12.9178
Y	2005	10	oct	3	11	3	13.2016	19.3088	8.42074	73.0069	44.3687	6.35003	6.43917	12.5102
Y	2005	11	nov	3	18	2	6.88802	12.8395	1.68381	63.3438	36.0667	4.11647	6.01	9.66967
Y	2005	12	dec	4	13	0	-5.08136	0.0129032	-9.90922	59.0111	35.6267	0.86231	6.59677	8.80613
Y	2006	1	jan	4	3	0	-1.42412	3.56498	-5.81244	65.2569	41.5069	5.28917	5.18111	7.87075
Y	2006	2	feb	4	2	0	-0.632802	4.42194	-5.4449	59.6212	35.3776	1.86175	6.25918	11.179
Y	2006	3	mar	1	1	0	4.60651	10.4276	-0.853917	56.0595	29.4977	1.17651	6.86083	15.3817
Y	2006	4	apr	1	0	0	11.0655	16.5205	6.14524	58.3631	34.9381	4.40906	5.07524	14.7692
Y	2006	5	may	1	0	0	17.7759	23.3171	12.6392	63.5179	40.6959	15.039	6.70323	18.2997
Y	2006	6	jun	2	7	0	21.2507	26.2076	17.0838	72.9603	51.2048	13.4431	5.92	17.513
Y	2006	7	jul	2	3	1	23.0079	26.229	20.5286	83.9213	69.7051	31.3583	2.24516	10.5361
Y	2006	8	aug	2	2	1	26.4245	31.2631	22.6461	73.2521	52.5991	7.39135	6.72949	18.4326
Y	2006	9	sep	3	3	0	19.6717	25.201	14.8876	68.9312	43.2762	2.30663	6.65095	15.4298
Y	2006	10	oct	3	10	2	16.3876	22.4493	11.4908	72.0545	44.0184	9.25048	6.00691	12.0339
Y	2006	11	nov	3	11	1	7.21625	12.2929	2.34286	64.6381	40.2905	3.67717	5.13048	8.161
Y	2006	12	dec	4	11	0	-0.0485983	5.09217	-4.30276	67.4414	43.0922	1.55513	4.86221	7.10172
Y	2007	1	jan	4	1	1	-1.14067	4.29585	-5.74977	65.6803	39.106	1.30345	5.81382	8.43086
Y	2007	2	feb	4	1	0	2.46767	8.70714	-2.81786	61.5468	35.4694	3.73279	6.20714	11.2139
Y	2007	3	mar	1	3	1	5.39649	10.6055	0.549309	66.2174	41.0369	6.9305	4.76682	11.5729
Y	2007	4	apr	1	4	0	10.8031	16.4543	5.49143	58.8558	32.0381	2.73391	6.32476	17.1189
Y	2007	5	may	1	4	0	17.2568	22.959	12.2816	67.328	40.8571	11.3542	6.47419	18.457
Y	2007	6	jun	2	4	1	22.0648	27.0471	17.261	67.4603	47.7143	5.17803	6.15571	18.2714
Y	2007	7	jul	2	2	0	23.4494	27.1816	20.3945	79.2074	62.3318	17.5097	3.48479	13.9999
Y	2007	8	aug	2	3	3	25.4438	29.241	22.4982	80.6935	63.2903	16.0868	3.6106	13.8351
Y	2007	9	sep	3	2	2	20.6428	24.5057	17.551	80.2528	62.2381	12.6629	2.74762	10.3877
Y	2007	10	oct	3	14	7	13.9299	19.5484	9.44516	72.3314	45.8295	2.80802	5.68848	11.9265
Y	2007	11	nov	3	28	4	5.27357	11.1014	0.299524	65.7851	38.3476	5.48578	6.01952	9.38389
Y	2007	12	dec	4	6	1	0.372561	4.98756	-3.44516	70.8111	48.1751	0.810409	4.23917	6.73903
Y	2008	1	jan	4	6	1	-2.58586	1.98387	-6.89631	61.7065	37.3456	2.58228	5.08525	7.97108
Y	2008	2	feb	4	5	1	-2.24644	3.41034	-7.7532	55.1073	28.9064	2.18857	7.72611	12.4478
Y	2008	3	mar	1	0	0	6.1076	11.8295	1.19724	65.8232	38.6728	4.64207	5.89171	13.389
Y	2008	4	apr	1	0	0	12.8575	19.4019	6.67143	60.0301	32.1667	3.49513	6.61048	17.0128
Y	2008	5	may	1	2	0	16.8775	22.7152	11.2793	65.224	39.6636	8.96564	6.57097	18.9528
Y	2008	6	jun	2	0	1	20.8584	25.9195	16.4924	71.6043	50.4857	11.235	5.54667	17.7657
Y	2008	7	jul	2	1	1	24.9847	28.6253	22.0991	82.8556	66.1014	29.4929	2.90968	13.5656
Y	2008	8	aug	2	1	3	24.6101	29.2493	20.7101	76.3616	54.6728	13.9809	6.58065	17.4161
Y	2008	9	sep	3	4	2	20.845	26.3667	16.4843	74.0123	47.719	12.2378	5.94	14.9412
Y	2008	10	oct	3	10	3	14.7531	20.8756	9.85484	72.2103	43.2806	6.22879	5.81014	11.7902
Y	2008	11	nov	3	22	1	6.29957	11.8143	1.41429	66.736	40.4762	2.65527	5.14238	8.684
Y	2008	12	dec	4	14	1	0.169451	4.91336	-4.38756	63.509	40.7373	2.10933	5.2765	7.53441
Y	2009	1	jan	4	3	0	-3.4682	2.76912	-8.75069	60.0249	33.8	0.727812	6.32903	8.86839
Y	2009	2	feb	4	3	0	2.02704	7.4102	-2.84439	64.9724	39.9786	4.14286	4.31837	8.83857
Y	2009	3	mar	1	5	0	5.66406	11.6498	-0.0304147	57.924	30.4258	6.35895	6.32258	14.7842
Y	2009	4	apr	1	2	0	11.6919	18.6552	5.39714	58.6852	30.68	7.22747	6.61571	17.491
Y	2009	5	may	1	6	0	18.0387	24.5811	12.3175	63.9295	36.1677	12.145	7.44839	19.7029
Y	2009	6	jun	2	5	0	21.6552	27.02	16.9757	70.4071	45.6267	8.94081	6.36095	19.1757
Y	2009	7	jul	2	2	1	23.6355	28.3498	19.976	79.0793	57.0968	34.3909	4.49078	15.3748
Y	2009	8	aug	2	0	0	24.7982	29.7115	20.7438	75.2793	53.0516	25.1182	5.5	16.3129
Y	2009	9	sep	3	5	0	20.3624	26.3	15.64	73.6062	45.4467	6.78112	6.62286	15.9977
Y	2009	10	oct	3	5	2	14.3479	21.2111	8.88341	69.4769	37.7419	10.0648	6.82627	13.3506
Y	2009	11	nov	3	10	0	6.10619	10.8624	1.95048	68.131	46.7267	6.94762	4.19857	7.805
Y	2009	12	dec	4	3	0	-1.66406	2.88111	-5.73318	65.6396	43.3484	1.67481	4.60369	6.7771
N	2001	1	jan	4	0	0	-0.00872162	4.59713	-4.09427	56.8277	37.0538	7.16926	5.09427	8.91806
N	2001	2	feb	4	0	0	2.87927	8.47421	-2.01349	53.1096	32.7421	11.106	5.95992	11.5832
N	2001	3	mar	1	0	0	7.15203	12.9007	1.66989	48.4552	27.0358	1.67253	7.38387	16.1574
N	2001	4	apr	1	0	0	13.1512	19.9811	6.35481	53.4614	28.7444	8.7869	8.48333	20.0663
N	2001	5	may	1	0	0	18.1329	23.4896	13.2115	63.3206	42.405	7.38142	6.95842	18.6503
N	2001	6	jun	2	0	0	21.6814	26.1426	17.8785	69.2248	53.1704	29.0079	5.3663	14.2352
N	2001	7	jul	2	1	0	25.5716	29.7964	22.0792	75.2593	58.9283	19.3186	6.42294	17.7577
N	2001	8	aug	2	2	0	25.4941	30.1007	21.829	70.7691	52.9964	9.79494	6.30896	16.8355
N	2001	9	sep	3	0	0	21.0188	26.2778	16.7267	67.0335	46.7296	13.7402	6.29296	16.0907
N	2001	10	oct	3	6	1	16.2503	21.633	11.9771	67.8205	45.9713	12.8607	5.32975	12.1881
N	2001	11	nov	3	4	0	8.03168	14.7556	2.69222	57.8136	32.2185	3.99352	6.52815	10.8927
N	2001	12	dec	4	0	0	2.56831	7.82437	-1.78459	52.622	31.7204	6.0409	5.74982	9.25935
N	2002	1	jan	4	0	0	3.09438	7.82688	-1.23799	56.7443	38.1039	5.9258	5.79821	9.30903
N	2002	2	feb	4	0	0	3.93355	10.6377	-1.65317	51.2555	26.9206	2.96333	7.38452	13.025
N	2002	3	mar	1	1	0	9.07472	15.2211	3.27455	53.0811	29.6882	14.6745	7.41219	15.569
N	2002	4	apr	1	0	0	14.052	19.6156	8.33222	58.2951	37.6963	18.4656	7.10519	16.8063
N	2002	5	may	1	0	0	17.2571	22.4308	12.4079	66.8747	45.7168	10.9321	6.68315	16.8806
N	2002	6	jun	2	1	0	21.5753	26.9026	16.5563	64.4901	42.6556	10.2617	8.20778	18.9147
N	2002	7	jul	2	0	0	24.6987	28.3183	21.7982	76.9906	63.3799	18.4232	5.55197	14.03
N	2002	8	aug	2	0	0	24.4951	27.8168	21.8018	78.1095	65.7814	40.8272	4.67133	12.4403
N	2002	9	sep	3	1	4	20.6846	26.0615	16.4104	70.8566	49.5519	14.3247	7.06519	15.8057
N	2002	10	oct	3	3	3	13.978	20.0108	9.07491	65.8731	42.2151	6.23957	7.019	13.0006
N	2002	11	nov	3	0	0	6.28417	12.1081	0.859259	55.5106	32.7185	1.33759	7.1237	11.096
N	2002	12	dec	4	0	0	3.99515	9.14337	-0.314337	60.6335	40.7491	4.01652	5.61828	8.70581
N	2003	1	jan	4	0	1	0.0533901	5.43477	-4.66201	54.9558	34.1219	2.9791	6.61219	10.06
N	2003	2	feb	4	0	0	3.90962	9.31548	-0.761905	60.6576	39.2738	6.96019	6.3377	11.5054
N	2003	3	mar	1	0	0	7.23941	12.5032	2.26989	60.4077	38.4086	5.4201	6.68208	14.5971
N	2003	4	apr	1	0	0	13.4293	18.7193	8.58926	62.0333	40.9889	17.1491	6.58333	16.0147
N	2003	5	may	1	0	0	17.4214	22.8147	12.6401	67.7361	47.3692	25.5993	6.64552	16.9797
N	2003	6	jun	2	0	0	21.3768	25.8844	17.5433	69.7316	52.263	25.0935	6.26704	15.5763
N	2003	7	jul	2	2	0	22.4936	25.7409	19.9355	79.4519	67.3369	22.4479	3.8276	11.289
N	2003	8	aug	2	0	1	24.6057	28.5014	21.5176	77.3082	62.3513	17.4624	5.30573	13.591
N	2003	9	sep	3	5	1	22.2698	26.9263	18.6463	74.0358	55.6852	24.0104	5.65259	13.2313
N	2003	10	oct	3	8	1	14.7269	21.2036	9.33477	61.3769	36.4122	2.76574	7.42652	14.3774
N	2003	11	nov	3	3	1	11.0933	16.2078	6.71148	69.7099	49.537	4.78891	4.44148	8.4
N	2003	12	dec	4	2	0	3.66743	9.37885	-1.18172	54.2682	31.6631	3.7254	6.38746	9.72452
N	2004	1	jan	4	0	0	0.943907	6.88208	-3.91577	53.3869	30.5376	0.292549	6.66631	9.93903
N	2004	2	feb	4	0	0	4.58242	10.931	-1.36782	50.9986	27.4751	10.226	7.55862	12.7607
N	2004	3	mar	1	0	0	7.98971	14.1896	2.08208	51.7424	27.6595	4.9649	7.48566	15.7297
N	2004	4	apr	1	0	0	13.7867	20.4919	7.17704	56.2958	29.7111	15.7045	7.86815	18.594
N	2004	5	may	1	1	0	18.0551	22.9466	13.3254	69.2112	47.5341	10.9008	6.06738	16.0816
N	2004	6	jun	2	0	0	21.9111	27.3226	17.1456	68.7451	48.2037	19.3268	6.60704	17.2077
N	2004	7	jul	2	1	0	26.1952	30.3989	22.8014	77.1561	60.3441	15.857	6.45412	17.6823
N	2004	8	aug	2	0	0	25.7093	30.1918	22.2763	74.9612	56.4803	23.7704	5.83835	15.9035
N	2004	9	sep	3	0	1	21.8431	26.3985	18.3511	75.041	55.4259	13.0514	3.93778	12.4163
N	2004	10	oct	3	14	0	15.4652	21.7717	10.053	64.1374	38.5627	1.25101	6.91039	14.1387
N	2004	11	nov	3	5	0	10.3244	17.1015	5.03	67.1318	39.2222	10.5195	6.54037	10.909
N	2004	12	dec	4	0	0	4.90212	10.728	-0.0892473	58.5527	32.871	4.50485	5.92581	8.96226
N	2005	1	jan	4	0	0	0.491428	5.6724	-4.0129	52.2521	29.5735	2.56294	6.14803	9.87548
N	2005	2	feb	4	1	0	1.33705	6.29325	-2.97421	53.4306	33.4524	4.83981	5.80159	11.31
N	2005	3	mar	1	0	0	6.32705	12.1889	0.739068	53.3329	29.8781	8.8595	7.53118	16.4687
N	2005	4	apr	1	0	0	13.957	20.2511	7.80148	56.9448	32.0704	11.7364	8.21741	19.681
N	2005	5	may	1	0	0	17.8049	23.9853	11.9018	62.3941	36.7312	16.5313	8.75197	21.9052
N	2005	6	jun	2	0	0	22.5356	27.5281	18.333	72.8971	52.0815	17.2689	6.95963	17.9493
N	2005	7	jul	2	0	0	24.9042	29.0004	21.6358	80.083	63.2151	16.7495	5.20753	14.8777
N	2005	8	aug	2	0	0	25.3906	29.5828	22.1609	78.2397	60.595	17.6185	5.20753	14.4032
N	2005	9	sep	3	0	2	22.5308	26.6307	19.2996	76.748	58.4296	7.36139	4.28333	12.331
N	2005	10	oct	3	9	0	15.3909	21.3018	10.5416	70.2603	44.6918	2.6828	5.85161	13.0194
N	2005	11	nov	3	2	2	9.26157	15.8933	3.80556	61.1356	33.3593	5.89272	6.79296	10.3203
N	2005	12	dec	4	2	0	0.142951	5.66237	-4.73477	52.082	30.1613	0.988519	6.3767	9.81419
N	2006	1	jan	4	0	0	2.18545	7.49247	-2.22222	57.1786	35.1971	4.92206	5.00179	8.82452
N	2006	2	feb	4	0	0	2.82477	8.14325	-2.14643	56.4563	32.8532	3.57053	5.98214	12.7014
N	2006	3	mar	1	1	0	7.32076	13.4287	1.41111	53.783	29.1828	2.81825	7.39713	16.991
N	2006	4	apr	1	0	0	12.3769	17.5415	7.24556	64.1992	42.6222	10.83	5.98222	16.1197
N	2006	5	may	1	2	0	17.4228	22.5842	12.7624	70.6774	47.9462	18.0545	5.63477	16.6029
N	2006	6	jun	2	1	0	21.5142	26.5904	17.1263	73.6236	51.8148	17.9402	6.70222	18.6213
N	2006	7	jul	2	1	1	23.6602	26.747	21.2082	84.4415	72.3333	27.4882	2.94373	10.6048
N	2006	8	aug	2	0	0	26.9265	31.7495	23.3118	76.3153	55.4695	10.2286	7.18781	17.8555
N	2006	9	sep	3	1	0	19.9163	24.907	15.8774	74.0066	51.1111	11.8376	5.51704	15.8203
N	2006	10	oct	3	4	3	17.4417	24.0742	12.5437	72.1659	41.6774	8.27222	7.30789	15.6958
N	2006	11	nov	3	3	2	10.1031	15.4022	5.24333	63.325	39.3444	3.52251	5.01519	10.2863
N	2006	12	dec	4	2	1	3.36791	9.10108	-1.12688	62.7104	37.6416	2.39709	5.76774	10.4761
N	2007	1	jan	4	0	0	2.39912	8.24731	-2.23226	57.4243	31.4982	0.658333	5.6767	11.3439
N	2007	2	feb	4	1	0	5.36825	11.8552	-0.196429	60.3199	32.1151	12.1247	7.05	14.6907
N	2007	3	mar	1	0	0	8.25306	13.61	3.30609	60.2484	37.7885	10.1229	5.87455	15.8429
N	2007	4	apr	1	0	0	12.6909	18.6374	6.67556	56.54	30.537	5.77233	7.08593	19.8383
N	2007	5	may	1	0	0	18.4343	24.2584	12.8975	63.2512	37.0609	10.4143	7.71362	21.9961
N	2007	6	jun	2	0	0	21.8993	26.3619	17.88	72.2011	52.7111	5.93821	5.00333	17.859
N	2007	7	jul	2	0	0	24.1178	27.9828	21.0394	79.616	62.9391	14.5392	4.13226	15.8235
N	2007	8	aug	2	1	1	26.6367	30.4821	23.6047	79.5727	62.0538	18.7935	4.75054	16.1471
N	2007	9	sep	3	2	2	22.1317	25.807	19.2719	80.8554	63.6741	20.8141	3.37926	11.623
N	2007	10	oct	3	10	2	16.3227	21.9717	11.819	72.4062	45.6201	11.4712	5.7767	14.8765
N	2007	11	nov	3	8	6	8.4486	15.2852	2.86296	61.064	32.1519	0.0583333	6.80481	11.035
N	2007	12	dec	4	1	0	4.31941	9.3552	0.138351	64.2151	41.3047	4.59902	4.88423	8.72355
N	2008	1	jan	4	0	0	1.80125	6.36738	-2.11864	59.7602	37.8495	5.40445	5.20466	7.58161
N	2008	2	feb	4	0	0	1.22754	7.28851	-4.23755	46.0624	22.7241	4.41852	7.85211	12.2745
N	2008	3	mar	1	0	0	8.04328	14.2477	2.32079	58.9511	33.086	5.20132	6.78674	13.4939
N	2008	4	apr	1	1	0	13.466	19.29	7.66407	62.1472	36.3	8.019	6.89926	15.586
N	2008	5	may	1	2	0	17.7826	23.7075	11.9875	65.3854	38.5412	17.0144	7.15412	17.0352
N	2008	6	jun	2	1	0	20.3955	24.5563	16.6056	75.4633	57.8774	16.9937	3.80222	12.585
N	2008	7	jul	2	1	0	26.7029	30.6527	23.5491	78.7754	61.8566	8.46619	4.90251	15.5194
N	2008	8	aug	2	1	0	25.3027	29.9297	21.4878	74.2993	54.4624	12.558	6.13907	14.6906
N	2008	9	sep	3	0	3	22.3845	27.4767	18.1285	73.1191	50.1815	2.10676	5.04556	12.382
N	2008	10	oct	3	17	1	16.8952	23.4434	11.5842	65.809	37.1366	6.51963	6.42079	13.8848
N	2008	11	nov	3	5	2	8.92523	14.7496	4.03481	64.7368	39.4252	2.09028	5.43407	10.355
N	2008	12	dec	4	2	0	3.17298	9.42043	-2.13405	58.7727	34.1362	1.31167	5.72796	9.31032
N	2009	1	jan	4	0	0	0.435842	6.88566	-4.87993	53.2373	28.147	2.07623	5.74229	10.3955
N	2009	2	feb	4	0	0	5.93028	12.0417	0.617857	60.3681	32.4246	6.29853	5.43135	11.6521
N	2009	3	mar	1	0	0	8.47014	14.4466	2.58029	54.1766	29.3405	8.50104	6.5276	16.4006
N	2009	4	apr	1	0	0	13.8663	20.8463	7.48889	54.1148	26.6667	11.7132	7.94333	20.2267
N	2009	5	may	1	0	0	18.8068	25.8731	12.5014	61.7373	33.0968	17.9367	7.73333	21.2494
N	2009	6	jun	2	0	0	22.1315	27.4748	17.5915	70.5715	47.7704	17.3736	5.84148	18.6847
N	2009	7	jul	2	1	0	24.0143	28.1882	20.8778	81.0875	62.9068	28.3572	3.06344	13.701
N	2009	8	aug	2	0	0	24.876	29.4208	21.248	75.5663	55.8638	7.61794	4.32939	14.7777
N	2009	9	sep	3	0	0	21.7411	27.4711	17.4385	72.5093	46.9815	4.01831	5.92815	16.0673
N	2009	10	oct	3	2	0	16.024	23.2588	10.3204	65.2645	33.7384	9.20754	7.33907	15.1177
N	2009	11	nov	3	4	1	8.95667	14.5715	4.42593	64.093	41.2704	7.36208	4.84667	9.63633
N	2009	12	dec	4	3	0	2.75161	8.45806	-1.87419	56.5197	32.2186	3.83396	5.87885	9.68645
I	2001	1	jan	4	2	0	-6.23992	-1.85806	-10.8613	66.7245	47.1935	3.76667	5.60968	8.13677
I	2001	2	feb	4	0	0	-2.41815	1.88214	-6.68571	66.119	46.2143	5.38571	6.75714	10.9571
I	2001	3	mar	1	0	0	3.22608	7.54194	-1.03871	54.5632	35.2903	1.75	8.20645	14.67
I	2001	4	apr	1	0	0	10.9679	16.1367	5.58333	54.0153	33.4	1.08333	10.7667	18.0893
I	2001	5	may	1	1	0	16.2599	21.1871	11.9226	66.9435	45.0323	3.4	11.0355	18.0626
I	2001	6	jun	2	0	0	20.276	24.3733	16.9467	72.1833	56.5333	9.76667	11.45	15.0667
I	2001	7	jul	2	0	0	23.8437	27.2871	21.1806	77.3804	65.129	28.925	10.6645	13.4997
I	2001	8	aug	2	0	0	24.6071	29.1161	20.5581	68.6022	51.5806	17.5	12.071	17.5539
I	2001	9	sep	3	0	0	20.5958	25.97	15.8	57.3806	39.9667	1.66667	11.5367	15.5153
I	2001	10	oct	3	1	0	14.5858	19.8871	9.98387	64.1022	44.9355	14.6429	8.43871	10.9084
I	2001	11	nov	3	1	0	5.42083	10.4033	0.64	60.8431	41.7333	3.1	6.89333	8.988
I	2001	12	dec	4	4	0	-2.14798	2.34516	-6.2871	53.9651	37.7419	3.25	6.84839	8.24484
I	2002	1	jan	4	0	0	-1.43266	2.29677	-5.18065	63.2917	47.6452	8.6	5.94194	8.14194
I	2002	2	feb	4	0	0	0.71369	5.45714	-3.57143	58.4554	40.1786	0.333333	7.09643	10.8236
I	2002	3	mar	1	1	0	5.72769	10.4419	1.07097	58.9476	38.8065	3.53333	7.77097	13.8635
I	2002	4	apr	1	0	0	11.6529	16.2667	6.77	56.5611	37.9333	18.4444	8.63333	17.2123
I	2002	5	may	1	1	0	15.5638	20.4839	10.9548	64.8011	46.2903	5.88889	8.94194	18.0903
I	2002	6	jun	2	0	0	19.6069	24.3333	15.1733	64.7847	47.9	7.09091	9.38	18.4973
I	2002	7	jul	2	0	0	23.1125	26.7871	20.2613	73.0255	62.1935	16.2308	6.96774	15.5281
I	2002	8	aug	2	0	0	22.5296	25.9387	19.4258	75.582	65.0645	19.4286	5.04516	10.3826
I	2002	9	sep	3	0	0	19.4601	24.5533	15.16	67.0847	50.2667	5.57143	7.77333	13.8517
I	2002	10	oct	3	2	0	10.9522	16.2806	5.95161	62.5323	41.9677	4.03571	7.89355	12.0713
I	2002	11	nov	3	5	0	2.42597	6.76	-2.25	58.1653	41.9	1.92857	6.46667	8.645
I	2002	12	dec	4	2	0	-0.322043	4.10323	-4.53548	61.8374	46.3548	1.67143	5.31935	5.90129
I	2003	1	jan	4	0	0	-4.54785	-0.132258	-8.56774	63.8199	47.5161	1.98	6.45484	6.88613
I	2003	2	feb	4	0	0	0.488988	5.22857	-3.91429	64.7708	46.9643	3.67778	6.51429	9.34214
I	2003	3	mar	1	1	0	4.04583	8.49355	-0.341935	61.9046	45.9677	2.94444	7.20323	12.9297
I	2003	4	apr	1	0	0	11.2497	15.8067	6.63667	60.6514	45.6333	12.9545	7.11333	12.6523
I	2003	5	may	1	1	0	17.1731	22.8742	11.7484	59.5188	42.5806	13.6667	9.23871	16.3687
I	2003	6	jun	2	2	0	19.7014	23.6133	16.0767	69.3611	57.6	13.9615	6.80333	11.7493
I	2003	7	jul	2	1	0	22.6345	26.5871	19.3226	72.4839	60.7419	16.0789	6.66774	9.69613
I	2003	8	aug	2	1	0	22.8918	26.7258	19.7226	73.1425	62.5161	22.4	5.15806	8.30452
I	2003	9	sep	3	0	2	19.6811	24.02	15.9033	69.7194	55.9667	32.9444	6.65667	9.807
I	2003	10	oct	3	4	0	12.8353	18.4226	7.55161	59.4288	39.9677	7.28571	8.06774	10.1723
I	2003	11	nov	3	5	3	7.74694	12.0667	3.69667	63.3319	48	4.92308	4.79333	4.93667
I	2003	12	dec	4	3	0	-0.768683	3.47419	-5.07097	56.7097	38.6774	0.285714	6.65161	4.94032
I	2004	1	jan	4	2	0	-3.48508	0.951613	-7.66452	59.7392	39.3871	2.7	7.03871	6.13871
I	2004	2	feb	4	0	0	0.547414	5.23103	-4.18621	56.7514	32.3793	6.17143	7.63448	9.38414
I	2004	3	mar	1	0	0	4.26922	8.88065	-0.654839	52.2715	28.3548	4.63333	8.6871	14.4019
I	2004	4	apr	1	3	0	10.6097	15.58	5.54	61.2167	37.6333	13.75	8.98667	16.4693
I	2004	5	may	1	5	2	14.9734	19.2516	11.229	76.6183	57	11.6429	7.06452	14.2219
I	2004	6	jun	2	1	1	20.4789	24.9833	16.4667	74.0306	55.7	4.75	7.42667	14.172
I	2004	7	jul	2	1	0	22.6544	25.4032	20.4065	88.9543	78.2258	24.1304	4.28387	10.5629
I	2004	8	aug	2	0	0	24.5727	28.6645	21.171	79.5524	63.2903	7.36111	7.35484	14.8119
I	2004	9	sep	3	0	0	20.3764	25.53	15.7767	77.6069	52.7	15.5417	7.52333	13.2987
I	2004	10	oct	3	2	0	13.63	20.4161	7.6871	62.8374	35.3548	3.33333	8.95161	12.94
I	2004	11	nov	3	4	1	7.65069	13.0933	2.71333	73.5819	46.8333	7.8	5.71	6.062
I	2004	12	dec	4	1	0	0.52957	5.28387	-4.10323	62.2204	38.5484	2.64286	6.58065	6.55613
I	2005	1	jan	4	2	0	-3.84449	1.39677	-8.6129	57.6868	33.9355	0.25	7.37097	9.15645
I	2005	2	feb	4	1	0	-3.10417	1.61786	-7.60714	54.1964	33.25	5.76	7.62143	13.1907
I	2005	3	mar	1	0	0	2.82675	7.46774	-1.70968	62.043	38.0323	0.9625	8.82581	17.5855
I	2005	4	apr	1	0	0	11.3675	16.4067	6.34333	62.5903	38.9	9.16667	8.64333	18.894
I	2005	5	may	1	0	0	15.7664	20.9935	10.8032	65.703	41.5161	13.8125	9.33226	21.5187
I	2005	6	jun	2	0	0	20.7656	24.9633	17.28	80.9361	63.2333	5.75	7.08667	18.1013
I	2005	7	jul	2	0	0	24.0081	27.4032	21.3871	84.4637	70.4839	12.25	5.39032	15.1768
I	2005	8	aug	2	0	0	24.0901	27.7871	21.1742	81.7742	67.2258	15.3684	4.97097	14.5035
I	2005	9	sep	3	0	0	20.685	25.65	16.8333	78.9292	58.8333	20.1786	5.6	12.9543
I	2005	10	oct	3	2	0	13.4255	19.3484	8.1	70.3737	42.0645	3.08333	7.28387	13.0597
I	2005	11	nov	3	5	0	7.40333	12.1267	2.38333	62.2833	40	3.74545	6.34	10.1003
I	2005	12	dec	4	4	0	-4.75148	-0.358065	-9.01613	57.129	35.2258	1.15556	6.82581	9.30742
I	2006	1	jan	4	1	0	-1.84946	2.77742	-6.07419	61.5618	39.4194	5.36667	5.53548	7.81258
I	2006	2	feb	4	1	0	-1.24583	3.46071	-6.00714	58.2619	35.25	0.811111	6.92857	11.0389
I	2006	3	mar	1	1	0	3.64086	8.41613	-1.03548	57.0457	32.9677	0.475	7.59677	15.2952
I	2006	4	apr	1	0	0	9.95861	14.5233	5.96333	61.9722	38.3	4	5.71	14.9423
I	2006	5	may	1	0	0	16.3366	21.0645	11.9935	67.922	47.3871	25.9444	7.40323	18.0897
I	2006	6	jun	2	0	0	19.3896	23.5867	15.9667	79.2528	61.9	12.7667	6.10333	16.9717
I	2006	7	jul	2	0	0	22.1878	24.9065	19.9613	85.4126	74	24.12	2.9129	10.5484
I	2006	8	aug	2	0	0	25.4911	29.6194	22.0968	77.2366	60.5484	4.77273	8.18387	18.719
I	2006	9	sep	3	0	0	19.4608	24.48	14.9533	69.0083	46.0333	3.125	7.25667	14.9053
I	2006	10	oct	3	2	0	16.3257	21.4323	11.6774	71.9435	49.2581	5.75	6.67742	11.8168
I	2006	11	nov	3	5	0	7.57903	11.98	2.84667	60.7569	39.9333	1.375	5.47667	8.13633
I	2006	12	dec	4	2	0	-0.0141129	4.50968	-4.18387	64.5887	42.5484	2.64286	5.41935	7.38
I	2007	1	jan	4	2	1	-1.33871	3.54194	-5.70323	65.078	41.0645	0.78	6.20968	8.46581
I	2007	2	feb	4	1	0	2.0994	7.36071	-2.77143	58.5878	35.8214	1.83333	6.62143	11.0789
I	2007	3	mar	1	0	0	4.91962	9.24516	0.370968	64.4651	43.7742	5.64706	4.92903	11.7177
I	2007	4	apr	1	0	0	10.0108	14.2533	5.64333	59.9847	38.6667	4.35	6.40667	16.9317
I	2007	5	may	1	0	0	15.7683	20.2903	11.3548	70.5726	50.0968	10.5938	6.02258	18.4665
I	2007	6	jun	2	0	0	21.1944	25.8167	16.8633	69.2694	52.0333	3.32143	6.00333	18.1963
I	2007	7	jul	2	3	0	22.5859	26.2548	19.7258	80.4113	65.5806	18.1667	3.30968	13.9132
I	2007	8	aug	2	0	0	25.0711	28.4065	22.3516	80.9409	67.0323	12.9545	3.34839	14.2694
I	2007	9	sep	3	1	0	20.9317	24.9567	17.66	75.6417	59.5667	8.3	3.22	10.6997
I	2007	10	oct	3	5	0	13.8515	19.0387	9.45806	69.0618	46.2581	2.5	5.46452	11.7545
I	2007	11	nov	3	5	0	5.50181	10.57	0.53	61.9417	37.9	5.78571	6.45	9.75333
I	2007	12	dec	4	3	0	0.668011	5.11935	-3.34516	66.9261	45.7097	0.971429	5.0129	7.21032
I	2008	1	jan	4	0	0	-3.04892	1.2129	-7.37742	57.125	35.3871	2.6	5.15484	8.27516
I	2008	2	feb	4	0	0	-2.02644	2.55172	-7.10345	54.75	31.2069	1.18	7.77241	12.74
I	2008	3	mar	1	1	1	5.96599	10.6129	1.65161	66.8051	44.0323	4.24545	6.32903	13.8994
I	2008	4	apr	1	0	0	12.3626	17.5033	7.07667	63.32	39.5333	4.69167	6.95	17.4393
I	2008	5	may	1	1	0	15.7734	20.3677	11.4258	70.6156	48.2903	7.36364	6.52258	18.8319
I	2008	6	jun	2	0	0	20.1875	24.6333	16.41	74.7597	54.7667	9.14	6.18333	17.7737
I	2008	7	jul	2	0	0	23.6765	26.6935	21.1968	87.8737	74.2581	28.8842	2.71935	13.3029
I	2008	8	aug	2	0	1	24.4301	28.5387	20.7065	79.1207	59.871	20.9929	7.08065	17.9435
I	2008	9	sep	3	1	0	20.6092	25.8233	16.16	75.6319	50.5667	15.35	6.42	14.787
I	2008	10	oct	3	2	0	15.0109	20.4032	10.2129	73.8011	46.6452	3.83333	6.24839	11.8974
I	2008	11	nov	3	4	0	6.59726	11.46	1.67	66.496	43.3	3.5	5.55667	8.91267
I	2008	12	dec	4	1	0	0.380242	4.69355	-4.15161	62.2339	41.7742	2.28333	5.16452	7.80839
I	2009	1	jan	4	0	0	-3.02903	2.39355	-8.05484	57.9742	34.9194	0.24	6.9129	9.53194
I	2009	2	feb	4	0	0	1.66429	6.45	-3.46071	63.6786	41.75	4.35714	4.38571	9.42393
I	2009	3	mar	1	0	0	4.94194	9.99032	-0.412903	59.6452	34.3065	7.5625	6.3871	14.2677
I	2009	4	apr	1	0	0	10.73	16.2633	5.37	62.89	37.1833	13.4	7.05333	17.616
I	2009	5	may	1	1	0	17.0161	22.229	12.2097	66.9903	43.5323	14.3	7.37742	19.6726
I	2009	6	jun	2	0	0	20.22	24.82	15.9433	76.49	53.5167	9.55	6.25667	19.2027
I	2009	7	jul	2	1	0	22.7645	27.3839	19.1968	81.4	60.9516	28.38	5.56774	16.7287
I	2009	8	aug	2	1	0	24.2129	28.8903	20.1355	77.1226	55.0968	34.7	5.95484	16.1013
I	2009	9	sep	3	1	0	19.8933	25.7067	14.9033	73.7667	46.1667	9.76667	6.91333	15.8153
I	2009	10	oct	3	2	0	14.4774	20.5581	9.07097	68.2677	39.7742	9.66667	7.3871	13.0755
I	2009	11	nov	3	1	0	5.74333	9.93667	1.5	67.9233	47.85	6.725	4.43333	7.94733
I	2009	12	dec	4	0	0	-2.0871	2.37419	-6.48065	62.8839	43.2419	2.35455	4.67097	7.05645
U	2001	1	jan	4	0	0	6.33098	9.10484	3.55161	62.7695	48.0968	7.49509	3.23387	5.60677
U	2001	2	feb	4	0	0	7.59926	10.8286	4.675	62.1801	46.0714	6.14643	4.19643	9.01929
U	2001	3	mar	1	0	0	10.3481	13.95	6.95161	54.998	36.0806	1.44731	6.44839	14.1771
U	2001	4	apr	1	0	0	14.889	18.2167	11.465	62.2	44.4667	12.0727	7.23667	18.1867
U	2001	5	may	1	0	0	19.1253	22.2677	16.4903	69.7043	51.8387	9.85742	5.16129	17.79
U	2001	6	jun	2	0	0	22.2642	24.7633	20.125	75.8097	62.4167	16.1097	3.58667	15.4063
U	2001	7	jul	2	0	0	27.0778	29.8774	24.5161	77.0538	65	13.8413	6.7629	19.5532
U	2001	8	aug	2	0	0	27.3571	30.2419	24.9855	70.8192	57.5484	11.6843	6.10645	15.1887
U	2001	9	sep	3	0	0	23.7133	26.2783	21.52	69.1687	57.1167	6.51821	6.335	13.5487
U	2001	10	oct	3	0	0	20.1376	22.9694	17.6339	64.8038	51.1774	10.3226	6.05968	11.599
U	2001	11	nov	3	0	0	13.3225	16.56	10.4317	56.7354	42.05	5.13125	5.84333	9.00133
U	2001	12	dec	4	0	0	8.29637	10.6161	5.97903	61.5685	47.7097	4.70934	2.78226	4.76387
U	2002	1	jan	4	0	0	8.3996	11.2403	5.92097	59.5887	47.4677	2.35288	4.26774	6.0871
U	2002	2	feb	4	0	0	8.45186	11.8107	5.33571	55.6079	38.8571	5.01806	6.69464	11.7854
U	2002	3	mar	1	0	0	12.1163	15.2532	8.85645	56.4288	37.129	6.49712	5.62742	13.2855
U	2002	4	apr	1	0	0	15.541	18.5317	12.535	64.3611	46.4667	7.24687	4.56667	15.032
U	2002	5	may	1	0	0	18.2784	20.9468	15.9177	71.6297	57.0806	9.65392	4.69194	15.08
U	2002	6	jun	2	2	0	22.0294	24.9533	19.2533	71.2451	56.7333	10.785	7.08	18.7417
U	2002	7	jul	2	1	0	24.9261	27.529	22.8516	85.006	71.8065	22.5647	4.0629	14.9755
U	2002	8	aug	2	1	0	26.1526	28.4468	24.0935	81.3542	71.5645	22.1797	5.02097	15.1642
U	2002	9	sep	3	0	0	23.1938	26.0117	20.6367	72.4465	60.15	13.2709	6.42667	14.898
U	2002	10	oct	3	1	0	18.296	21.5	15.3226	65.25	50.7258	14.8347	5.94032	11.4019
U	2002	11	nov	3	0	0	11.5969	14.715	8.53833	60.8896	46.6833	1.84615	5.20167	9.04167
U	2002	12	dec	4	0	0	9.40605	11.8968	7.06774	66.2554	53.3871	5.43353	3.17903	4.58742
U	2003	1	jan	4	0	0	5.54556	8.2129	2.77419	63.5356	51.0806	4.96719	3.79355	6.0029
U	2003	2	feb	4	0	0	8.23229	10.9464	5.40179	65.6339	51.6964	4.99588	4.24464	8.78857
U	2003	3	mar	1	0	0	10.07	13.2355	7.17903	64.4603	49.2097	9.50952	5.61129	13.8558
U	2003	4	apr	1	0	0	15.0099	18.5617	12.0817	68.4764	52.2333	13.6929	5.755	16.301
U	2003	5	may	1	0	0	18.6562	21.5597	16.0952	74.8448	60.0161	24.5536	5.14516	16.7555
U	2003	6	jun	2	0	0	21.9872	24.8633	19.5167	75.8278	60.35	18.992	5.735	17.6227
U	2003	7	jul	2	0	0	24.4239	26.8952	22.3532	85.3118	73.7097	13.5094	2.52258	12.8939
U	2003	8	aug	2	0	0	26.7464	29.45	24.4935	79.2157	67.371	16.3441	5.32903	15.2342
U	2003	9	sep	3	0	0	24.7035	27.6317	22.265	73.3764	60.9667	22.3551	7.30833	16.2367
U	2003	10	oct	3	0	0	18.5196	21.9806	15.4952	61.8333	47.9677	6.85	7.11452	14.0561
U	2003	11	nov	3	0	0	15.7577	18.7767	12.9033	71.4132	58.4333	6.95882	4.1	7.172
U	2003	12	dec	4	0	0	9.04832	11.8048	6.32419	59.8562	46.0161	1.20595	4.28871	6.08065
U	2004	1	jan	4	0	0	6.36855	9.35645	3.78871	59.5444	44.3548	1.79412	4.2129	6.30355
U	2004	2	feb	4	0	0	9.01056	12.4948	5.65	54.9749	38.8793	5.73462	6.18103	11.9921
U	2004	3	mar	1	0	0	10.8858	14.6	7.4	55.8185	39.2903	5.75032	6.24677	15.1158
U	2004	4	apr	1	0	0	15.1426	18.87	11.5283	60.4028	40.75	15.655	7.13667	18.0023
U	2004	5	may	1	0	0	18.708	21.8581	15.8339	72.1297	57.0968	15.3567	5.45645	16.2265
U	2004	6	jun	2	0	0	22.5439	25.3267	19.9817	72.7875	59.6833	10.2708	5.87833	17.0913
U	2004	7	jul	2	0	0	27.3202	30.2452	24.8274	77.0497	65.6129	5.8858	7.94516	22.9016
U	2004	8	aug	2	0	0	28.0636	30.9758	25.7226	75.4402	63.2581	23.5953	7.09032	16.5513
U	2004	9	sep	3	0	0	23.9921	26.71	21.6867	76.0187	63.8333	17.7368	3.98333	11.1473
U	2004	10	oct	3	0	0	18.9729	22.4968	15.8387	61.9483	46.2419	4.10625	7.40484	13.8681
U	2004	11	nov	3	0	0	14.1467	17.81	11.03	63.2681	47.6333	8.2875	6.21833	9.77633
U	2004	12	dec	4	0	0	10.1956	13.1903	7.22419	62.3609	48.2419	5.20889	4.28548	6.32323
U	2005	1	jan	4	0	0	5.62453	8.1	3.37258	59.2406	46.129	2.21238	3.09516	4.69516
U	2005	2	feb	4	0	0	5.90156	8.55714	3.32321	63.7582	50.3929	6.08351	3.16607	7.6075
U	2005	3	mar	1	0	0	8.6412	12.1581	5.25323	58.1216	40.7742	10.0117	6.04194	14.4142
U	2005	4	apr	1	0	0	15.1191	18.7567	11.7433	59.6938	41.9	9.16786	7.6	20.604
U	2005	5	may	1	0	0	18.0336	21.6258	14.7919	63.4778	45.4516	12.769	7.70323	21.1781
U	2005	6	jun	2	0	0	22.7578	25.6967	20.235	72.9701	58.9667	5.98889	6.48667	21.8167
U	2005	7	jul	2	0	0	26.2331	28.7839	24.179	76.8407	65.4839	9.85625	4.47742	17.2839
U	2005	8	aug	2	0	0	26.7543	29.2774	24.6097	73.504	61.871	13.9618	5.74839	18.0384
U	2005	9	sep	3	0	0	24.899	27.5367	22.865	71.2521	59.5167	1.05714	5.61833	14.9227
U	2005	10	oct	3	0	0	19.385	22.3597	16.8371	60.8112	47.0323	3.89325	5.69677	11.8487
U	2005	11	nov	3	0	0	14.6544	17.965	11.57	56.4569	41.8333	11.9889	5.32167	9.26167
U	2005	12	dec	4	0	0	6.3039	9.0129	3.59839	59.2749	45.5806	4.07333	3.4	5.2971
U	2006	1	jan	4	0	0	7.8127	10.4145	5.35968	60.914	46.6935	5.3875	3.63871	6.04323
U	2006	2	feb	4	0	0	7.09323	9.87321	4.27321	59.6801	44.7857	4.63214	3.98929	8.65036
U	2006	3	mar	1	0	0	10.3015	13.7177	6.86452	56.4684	38.5323	3.82262	6.5	15.1165
U	2006	4	apr	1	0	0	14.3431	17.8267	11.0817	60.8069	40.1333	14.0341	6.03333	16.4637
U	2006	5	may	1	0	0	17.7085	20.8097	14.9032	72.1613	55.3548	11.0723	4.8371	17.141
U	2006	6	jun	2	0	0	21.3645	24.0433	19.0133	77.7	62.9167	25.6182	4.835	17.1613
U	2006	7	jul	2	0	0	25.5157	27.9694	23.5032	80.9489	69.8548	18.6413	4.20645	17.4619
U	2006	8	aug	2	0	0	28.1995	30.8855	25.8177	71.7843	60.4355	8.41429	7.44677	18.9035
U	2006	9	sep	3	0	0	22.4001	25.1317	20.3133	67.9743	54.5667	14.4929	4.78333	13.0923
U	2006	10	oct	3	0	0	20.4434	24.05	17.3742	60.5161	45.7742	6.37857	7.30484	14.0287
U	2006	11	nov	3	0	0	15.1605	18.2467	12.3767	59.2875	45.15	5.39905	4.34667	7.717
U	2006	12	dec	4	0	0	9.47977	12.3548	6.84516	60.4751	47.7258	3.17338	3.5629	5.36484
U	2007	1	jan	4	0	0	7.55289	10.2274	5.15645	59.2305	47.1452	5.46632	2.97419	5.25903
U	2007	2	feb	4	0	0	9.60789	13.1339	6.31607	60.6957	44.0357	5.07727	5.9875	11.2229
U	2007	3	mar	1	0	0	11.1447	14.4581	7.96774	59.9456	44.4355	7.62587	5.05645	12.9442
U	2007	4	apr	1	0	0	14.311	18.0783	10.83	52.1403	33.7333	7.78393	6.41833	17.525
U	2007	5	may	1	0	0	19.1301	22.7694	15.8484	59.4973	39.4516	9.30909	7.45	20.8706
U	2007	6	jun	2	0	0	21.6275	24.2583	19.31	77.6653	65.5333	8.43173	4.34	17.0803
U	2007	7	jul	2	0	0	25.0835	27.6548	22.9081	77.9563	65.9516	23.9688	5.02581	16.3797
U	2007	8	aug	2	0	0	28.1349	30.929	25.8306	71.838	59.0484	15.0672	6.75484	19.7058
U	2007	9	sep	3	0	0	24.1894	26.7017	22.125	73.7535	61.7167	38.9735	3.96333	11.533
U	2007	10	oct	3	0	0	19.1951	22.1774	16.6355	62.3602	49.6129	19.4722	5.84677	12.0687
U	2007	11	nov	3	0	0	12.9072	16.2517	9.82667	52.4826	38.6333	0.210714	5.07	8.78433
U	2007	12	dec	4	0	2	9.91929	12.4645	7.59194	59.9698	45.371	6.45339	3.54889	4.99143
U	2008	1	jan	4	0	0	7.11815	9.49839	4.99516	64.7056	51.6129	7.4754	2.44516	4.8529
U	2008	2	feb	4	0	0	5.49945	8.39655	2.70172	53.9841	40.7241	3	4.98246	8.94481
U	2008	3	mar	1	0	0	10.4998	13.7887	7.45645	61.295	44.7581	7.73462	6.62903	14.9435
U	2008	4	apr	1	0	0	14.6104	17.6567	11.6967	64.2868	46.6333	7.04615	5.68333	18.0473
U	2008	5	may	1	0	0	17.8947	21.2097	14.6387	66.5083	47.5113	16.6314	6.81129	20.3648
U	2008	6	jun	2	0	0	20.779	23.135	18.7283	80.4539	66.0833	16.2194	2.45833	13.83
U	2008	7	jul	2	0	0	27.1585	29.8887	24.9355	77.4852	64.8871	4.73608	6.70323	21.2832
U	2008	8	aug	2	0	0	26.897	29.7452	24.5468	73.9449	60.9355	11.4668	5.70484	17.7342
U	2008	9	sep	3	0	0	24.284	26.825	22.18	74.1792	60.9667	12.6908	4.19333	13.5417
U	2008	10	oct	3	0	0	19.9769	23.1629	17.171	63.3518	48.8871	7.23661	5.83387	13.1542
U	2008	11	nov	3	0	0	13.4834	16.2683	10.7	61.1368	46.65	6.11326	3.82333	7.192
U	2008	12	dec	4	0	0	9.08112	12.229	5.98548	58.5074	43.4032	2.56591	4.22419	6.2829
U	2009	1	jan	4	0	0	5.86774	8.67339	2.99435	62.0097	46.2984	3.12381	2.61532	5.92855
U	2009	2	feb	4	0	0	9.23839	12.3107	6.28929	64.9795	45.8571	8.98577	3.7375	9.71107
U	2009	3	mar	1	0	0	10.146	13.6718	6.64113	58.7815	38.7258	12.1734	5.05484	14.3273
U	2009	4	apr	1	0	0	13.9108	17.7825	10.0558	60.12	40.2083	20.8476	7.88583	19.6065
U	2009	5	may	1	0	0	18.5766	22.6669	14.9492	60.7169	39.5403	8.45625	8.31532	22.8261
U	2009	6	jun	2	0	0	21.6	24.8483	18.7642	74.0908	57.2333	19.8621	5.87833	20.2445
U	2009	7	jul	2	0	0	24.8798	27.671	22.5935	79.225	66.5887	13.5558	3.89355	18.0035
U	2009	8	aug	2	0	0	25.754	28.6161	23.4944	74.9024	60.8065	11.7895	5.26371	17.6718
U	2009	9	sep	3	0	0	23.2692	26.3083	20.8983	70.2858	55.4583	11.175	5.53583	15.932
U	2009	10	oct	3	0	0	19.4153	22.9863	16.2371	56.996	38.4435	13.1905	7.03145	15.259
U	2009	11	nov	3	0	0	12.5808	15.7442	9.9225	65.6092	51.3083	10.5351	3.38667	7.37767
U	2009	12	dec	4	0	0	7.6371	10.5589	4.82984	62.4016	46.371	1.65258	3.26613	5.87419
E	2001	1	jan	4	0	0	-2.36277	2.47806	-6.93935	72.3567	48.1419	4.18584	4.42194	7.67419
E	2001	2	feb	4	1	0	0.218065	6.05071	-4.73357	67.5833	41.8929	12.2865	5.73571	10.8704
E	2001	3	mar	1	2	0	4.52358	10.8187	-1.24516	63.8892	37.1613	2.75741	6.53806	14.461
E	2001	4	apr	1	1	0	11.8982	19.984	4.00733	57.9461	28.16	6.856	8.76867	20.116
E	2001	5	may	1	0	0	17.9669	24.2239	12.0845	64.2702	39.4581	5.77734	7.5529	20.2652
E	2001	6	jun	2	0	0	21.7899	26.4633	17.5687	71.8994	53.48	23.2142	4.66467	14.5407
E	2001	7	jul	2	0	0	25.6634	30.2348	22.0323	75.3785	56.9806	22.6703	5.84968	15.3448
E	2001	8	aug	2	0	0	24.9384	30.2729	20.5897	72.539	50.7806	7.84243	6.53419	16.8606
E	2001	9	sep	3	2	3	20.4045	27.0073	14.666	67.5819	41.5467	15.1324	7.682	17.0957
E	2001	10	oct	3	12	18	14.8008	20.9465	10.0135	73.9618	47.6774	8.99364	5.22581	10.9894
E	2001	11	nov	3	9	14	5.88572	12.7313	0.352667	69.6036	39.4533	2.60814	6.00667	9.32367
E	2001	12	dec	4	0	0	0.203871	5.11484	-4.02194	70.45	47.1161	4.68305	4.80258	7.12871
E	2002	1	jan	4	0	1	1.30269	5.88516	-2.90903	72.1863	51.8258	5.98538	4.58129	6.81839
E	2002	2	feb	4	0	0	1.2678	7.94214	-4.27071	66.3577	37.3286	2.54667	6.395	11.5679
E	2002	3	mar	1	0	0	6.86664	13.9619	0.292258	61.8298	34.0581	6.10094	7.01484	14.5213
E	2002	4	apr	1	2	0	13.1192	19.716	6.634	59.6281	36.3067	16.3903	7.52333	17.8033
E	2002	5	may	1	0	0	16.7818	22.4806	11.4535	65.8183	42.5613	7.56991	6.31548	17.1087
E	2002	6	jun	2	0	0	21.2243	27.1933	15.4927	63.93	41.0067	7.74297	7.97	20.0597
E	2002	7	jul	2	0	0	24.7067	28.8555	21.2974	72.4083	56.4581	9.21395	5.56903	15.1661
E	2002	8	aug	2	1	1	23.8516	27.2916	21.2213	78.2196	64.8452	27.8458	3.5271	10.8771
E	2002	9	sep	3	1	7	19.7071	25.658	15.1553	73.7556	49.7333	10.3467	6.27533	14.7823
E	2002	10	oct	3	30	14	12.1387	18.7123	6.56581	70.8379	42.9419	3.21603	6.01484	12.5513
E	2002	11	nov	3	7	1	4.07808	9.7	-1.25133	68.6247	43.3667	3.37716	5.55	9.66067
E	2002	12	dec	4	1	1	1.69172	6.81742	-2.8329	71.9796	49.5161	3.47237	4.50129	7.56161
E	2003	1	jan	4	1	0	-2.96097	2.19355	-7.90903	68.9336	48.5806	3.82	5.05935	9.01419
E	2003	2	feb	4	0	1	1.52283	6.99286	-3.23214	63.0935	40.8714	4.56622	5.40071	10.4439
E	2003	3	mar	1	0	0	5.44261	11.1781	0.170968	64.3957	40.2194	4.18452	6.02581	13.3648
E	2003	4	apr	1	1	0	12.4969	18.396	6.85533	63.2622	38.34	18.0253	6.63733	15.1963
E	2003	5	may	1	0	0	17.983	24.0839	12.2813	66.8973	42.3742	15.6157	7.00516	18.3419
E	2003	6	jun	2	0	0	20.8116	25.636	16.3373	69.8978	50.0267	11.5677	5.77067	14.8663
E	2003	7	jul	2	1	0	22.7235	26.4542	19.7516	78.8989	63.471	26.2132	3.56323	11.4539
E	2003	8	aug	2	1	1	23.651	27.9006	20.3477	77.3981	60.0387	18.0921	4.57161	12.2023
E	2003	9	sep	3	4	4	21.0185	26.44	16.732	74.9447	52.1333	17.2101	5.64533	12.9737
E	2003	10	oct	3	30	10	12.6105	19.9277	6.55871	67.4567	37.4645	4.3725	7.25032	13.1629
E	2003	11	nov	3	10	3	9.21072	15.0913	4.094	72.2556	49.9267	2.98596	4.48	7.87067
E	2003	12	dec	4	2	0	1.22855	6.26774	-3.25613	69.3774	45.0387	2.09397	4.40387	7.37613
E	2004	1	jan	4	2	0	-1.94828	3.97871	-6.85484	70.5694	43.6194	1.31806	5.37806	8.99484
E	2004	2	feb	4	0	0	2.01224	8.53379	-3.9331	64.7928	35.6759	3.72832	6.67862	11.9572
E	2004	3	mar	1	0	0	5.73312	12.5548	-0.678065	56.9134	29.9935	3.406	7.43097	15.3948
E	2004	4	apr	1	1	0	11.8908	19.568	4.36533	56.6122	27.1067	7.59417	8.04467	17.6607
E	2004	5	may	1	1	0	17.0933	22.4245	11.7368	67.7242	45.8129	6.81539	6.29677	16.1597
E	2004	6	jun	2	1	0	21.6818	27.1013	16.7153	68.9567	47.4867	17.6538	6.44667	16.5413
E	2004	7	jul	2	3	0	25.345	29.6039	21.909	75.4753	57.7355	16.5182	5.69548	15.1203
E	2004	8	aug	2	2	1	24.9794	30.1277	21.0277	75.1344	53.1484	22.7665	6.62129	15.3142
E	2004	9	sep	3	6	1	20.4136	25.8087	16.1713	74.6511	50.9933	12.4923	5.10667	13.0553
E	2004	10	oct	3	29	11	13.1504	20.789	6.51935	65.1	33.871	0.998333	7.68516	13.9239
E	2004	11	nov	3	13	3	7.94219	14.7427	2.47933	71.2428	41.9133	8.61389	5.39467	8.86333
E	2004	12	dec	4	5	1	2.45449	8.35677	-2.77484	66.0559	39.7677	4.37924	5.07548	7.84677
E	2005	1	jan	4	1	0	-1.91839	2.74258	-6.50968	65.7548	42.6387	1.24544	5.01677	8.67806
E	2005	2	feb	4	0	0	-1.12774	3.64357	-5.43	64.3488	41	2.51593	5.76643	11.1786
E	2005	3	mar	1	0	0	3.60094	9.94129	-2.21677	62.5871	34.9355	5.35323	7.31742	15.2545
E	2005	4	apr	1	1	0	12.9029	20.228	5.852	56.1708	28.4133	7.38433	8.23267	18.478
E	2005	5	may	1	2	0	16.946	24.0348	10.04	62.6828	33.4452	8.64	8.46774	20.2435
E	2005	6	jun	2	0	0	22.4166	28.044	17.7547	72.8786	47.4667	17.0454	6.84	17.848
E	2005	7	jul	2	0	0	25.1101	29.5523	21.5335	79.1024	59.5032	23.86	4.96323	13.8345
E	2005	8	aug	2	0	1	24.682	29.071	21.2813	79.2296	59.4	19.5503	4.99097	14.1597
E	2005	9	sep	3	5	3	21.8857	26.7987	17.996	76.8047	55.3867	9.12518	4.81	12.24
E	2005	10	oct	3	20	2	13.26	19.9897	7.64	73.8118	43.6903	2.87485	5.68839	11.8145
E	2005	11	nov	3	15	2	7.23089	14.1153	1.24133	66.8717	36.56	3.9185	5.818	9.94
E	2005	12	dec	4	2	0	-3.2425	1.83742	-8.30839	71.2118	48.1097	2.89375	4.55355	7.58484
E	2006	1	jan	4	2	0	0.173065	5.22194	-4.19097	68.2898	42.9355	3.99071	4.52387	7.8771
E	2006	2	feb	4	1	0	0.342202	5.47357	-4.76071	65.5857	40.05	4.97212	5.44571	10.6779
E	2006	3	mar	1	0	0	5.18645	11.8065	-1.15355	58.4242	29.9548	1.54095	7.06387	15.1329
E	2006	4	apr	1	1	0	10.6442	16.596	4.9	66.0786	41.3267	6.23793	5.656	14.5677
E	2006	5	may	1	1	0	17.5097	23.3394	11.9742	69.0159	43.4903	13.1083	6.13677	17.1613
E	2006	6	jun	2	3	0	21.8289	27.5053	16.7087	70.6575	45.06	12.2239	6.70133	17.8877
E	2006	7	jul	2	1	1	23.7309	27.2587	21.0452	83.1145	68.3484	21.8955	2.89161	10.5587
E	2006	8	aug	2	3	0	26.1132	31.4419	22.2826	77.0788	54.3355	11.8251	6.42194	15.9152
E	2006	9	sep	3	7	4	18.8401	25.0593	13.712	74.2092	46.8667	5.44286	6.20733	14.2227
E	2006	10	oct	3	31	12	15.8508	23.9174	9.55097	72.3183	36.6129	6.98833	7.14194	12.8571
E	2006	11	nov	3	15	5	8.33675	14.3447	2.67	67.5756	41.3733	6.10242	4.86333	8.82233
E	2006	12	dec	4	6	1	1.15989	7.00194	-3.36774	74.1347	46.1548	3.90761	4.71742	7.34258
E	2007	1	jan	4	0	0	-0.0976344	5.53613	-4.59871	71.7516	43.8065	2.485	4.6671	8.27387
E	2007	2	feb	4	2	0	3.42744	10.2557	-2.085	67.128	36.3143	7.89869	6.61571	12.1832
E	2007	3	mar	1	0	0	6.55	12.6929	0.901935	64.7763	36.8387	8.06113	5.29548	12.8461
E	2007	4	apr	1	3	0	10.5884	17.5227	3.90933	58.8447	29.58	6.57333	6.97733	17.7183
E	2007	5	may	1	1	0	17.372	23.749	11.1877	63.0995	34.1677	9.44376	7.40194	19.2642
E	2007	6	jun	2	0	0	21.8638	26.9	17.23	70.9372	49.7067	7.25937	4.67533	16.5833
E	2007	7	jul	2	0	0	24.1155	28.3148	20.7277	78.8554	60.5677	14.8687	3.56581	13.5539
E	2007	8	aug	2	0	0	26.1267	30.4355	22.9613	79.072	59.4839	19.1571	4.16968	14.43
E	2007	9	sep	3	1	3	21.0841	25.136	17.9613	82.5739	63.6333	28.9146	3.11667	10.397
E	2007	10	oct	3	7	7	13.8382	20.3026	8.62065	75.7368	44.7484	6.36056	5.45806	12.1723
E	2007	11	nov	3	17	3	5.64236	12.582	-0.153333	69.5786	38.2667	1.39024	5.83733	9.89767
E	2007	12	dec	4	2	0	1.89645	6.95613	-2.27097	75.8231	52.6194	3.28825	2.90839	6.18839
E	2008	1	jan	4	1	0	-1.02304	3.35355	-4.77032	72.0022	48.2194	3.59513	4.42065	7.57097
E	2008	2	feb	4	0	1	-1.63204	4.20414	-7.1131	62.3157	33.3724	2.00044	6.88414	12.5931
E	2008	3	mar	1	1	0	6.33475	13.2058	-0.00193548	63.5588	32.2194	4.25689	6.1929	14.5097
E	2008	4	apr	1	0	0	12.6288	19.572	5.71467	60.9278	31.2	5.57752	6.36733	17.7847
E	2008	5	may	1	1	0	17.1947	23.9381	10.489	63.5022	33.8955	13.9473	7.25871	20.3642
E	2008	6	jun	2	1	0	21.0649	25.9007	16.6807	72.84	52.1867	15.3523	4.02867	16.414
E	2008	7	jul	2	1	0	26.1602	30.54	22.6981	77.7583	58.2903	11.6948	4.30581	16.0332
E	2008	8	aug	2	1	1	24.5288	29.4477	20.3	75.997	53.7742	10.8856	5.77226	16.9023
E	2008	9	sep	3	3	1	21.5316	27.6113	16.5193	74.2517	45.5467	4.15663	5.724	14.888
E	2008	10	oct	3	10	2	15.1267	22.4116	9.12129	69.5979	36.8903	4.02239	6.06387	12.2077
E	2008	11	nov	3	2	0	7.13545	13.5067	1.652	70.3456	41.2667	2.58158	4.81533	8.81133
E	2008	12	dec	4	2	0	1.66699	7.21742	-3.59484	66.0619	42.2968	1.99077	4.37226	7.19774
E	2009	1	jan	4	1	0	-1.29447	4.52719	-6.41014	69.3618	41.9078	1.90752	4.95161	7.79613
E	2009	2	feb	4	0	0	3.54286	9.30969	-1.77143	69.7806	39.1122	5.66156	4.20204	8.68161
E	2009	3	mar	1	1	0	6.44009	12.9101	0.520737	62.4286	32.4424	3.79325	6.49585	13.8582
E	2009	4	apr	1	0	0	11.7295	19.4176	4.88714	60.2381	28.8143	5.66624	7.61667	17.0115
E	2009	5	may	1	0	0	17.8806	25.17	11.141	63.6392	33.129	12.836	8.08848	18.8542
E	2009	6	jun	2	0	0	21.991	27.9852	16.631	68.8229	42.0952	14.4249	6.64952	17.9953
E	2009	7	jul	2	0	0	24.0359	28.3871	20.635	80.1806	59.7972	23.4022	3.28802	12.2111
E	2009	8	aug	2	1	0	24.8903	30.0673	20.724	76.5267	52.9493	10.6473	5.57972	14.8379
E	2009	9	sep	3	2	1	20.8038	27.1029	15.8419	74.7114	45.1952	6.56327	6.44381	14.5623
E	2009	10	oct	3	17	3	14.9253	22.5157	8.73088	68.3774	33.5853	4.06766	7.14009	12.4905
E	2009	11	nov	3	12	1	7.52905	13.0238	2.83762	69.0476	44.9905	2.85592	4.42381	7.4885
E	2009	12	dec	4	3	0	0.45023	5.35253	-4.00553	71.376	46.0968	3.42798	4.08986	6.42613
O	2001	1	jan	4	0	0	0.940899	4.92995	-2.87604	61.756	44.0092	3.51191	4.67788	8.30548
O	2001	2	feb	4	0	0	2.80383	8.15561	-1.73163	59.3675	37.852	9.44191	5.63316	11.5168
O	2001	3	mar	1	0	0	6.46262	11.8627	1.55622	57.49	34.9217	1.68543	7.60184	16.2081
O	2001	4	apr	1	1	1	12.5372	18.9229	6.22524	58.2655	32.881	5.94252	8.78286	20.877
O	2001	5	may	1	0	0	18.0106	23.024	13.6106	66.4107	45.4516	4.16742	7.60783	20.011
O	2001	6	jun	2	0	0	21.1437	25.2257	18	73.2145	57.3619	25.2389	6.50857	15.377
O	2001	7	jul	2	0	0	25.4155	29.0931	22.3917	79.2281	63.9908	12.9523	8.00691	19.3387
O	2001	8	aug	2	0	3	25.3583	29.6276	21.912	74.3402	55.6129	8.79038	8.27696	18.7245
O	2001	9	sep	3	2	2	21.5357	26.689	17.3024	67.3577	46.5381	7.52024	8.35048	17.7083
O	2001	10	oct	3	27	11	16.6941	21.6023	12.6276	68.3988	47.871	7.50521	6.86498	12.6726
O	2001	11	nov	3	5	8	8.1906	14.1714	3.27952	62.2232	37.719	3.23707	7.13238	10.8333
O	2001	12	dec	4	0	1	3.13658	7.14747	-0.497696	59.8879	42.0645	3.66842	5.54101	7.64355
O	2002	1	jan	4	0	0	3.53095	7.42765	0.0705069	65.1663	47.447	3.40836	4.86636	8.33258
O	2002	2	feb	4	0	0	3.61265	9.41173	-1.37806	58.7963	35.5357	3.33639	6.89643	12.6486
O	2002	3	mar	1	0	0	8.40728	14.0682	2.99862	60.8195	37.1106	8.94615	6.67604	15.2423
O	2002	4	apr	1	0	0	13.2524	18.3124	8.35429	64.8944	43.6429	11.6541	6.72	17.161
O	2002	5	may	1	0	0	16.8926	21.4908	12.9018	71.1342	51.5668	7.45985	5.92857	16.5971
O	2002	6	jun	2	1	0	21.249	26.07	16.8757	69.1343	48.2333	14.0861	8.20905	21.9053
O	2002	7	jul	2	0	0	24.0933	27.4147	21.5599	81.053	66.8479	17.2125	4.96636	15.5723
O	2002	8	aug	2	1	2	24.2788	27.3659	21.9539	80.9439	68.47	31.5489	4.54424	13.8571
O	2002	9	sep	3	6	7	20.9359	26.1081	16.9586	72.6464	51.681	14.039	7.47905	16.584
O	2002	10	oct	3	11	12	14.483	19.977	9.79217	66.866	43.3871	5.05402	6.7106	13.1268
O	2002	11	nov	3	7	4	6.64607	11.6914	1.76952	62.3643	41	2.10096	6.13952	10.1217
O	2002	12	dec	4	1	0	4.27062	8.53272	0.418894	66.466	48.6636	1.97554	4.66912	7.54
O	2003	1	jan	4	1	0	0.469508	4.45622	-3.32719	64.7366	46.9124	2.75735	5.30968	8.83871
O	2003	2	feb	4	0	0	3.90193	8.38367	-0.17551	65.9534	47.2449	5.35612	5.61582	10.9896
O	2003	3	mar	1	0	0	6.69633	11.4645	2.21152	64.99	43.9493	6.3317	6.33364	14.7842
O	2003	4	apr	1	0	0	13.1123	17.8829	8.75952	65.9962	44.6429	17.832	6.18286	16.3047
O	2003	5	may	1	0	0	17.5641	22.2023	13.4415	71.3331	51.9401	16.1654	6.12166	17.8906
O	2003	6	jun	2	1	2	20.8915	24.9743	17.3043	73.0437	55.4571	19.1466	5.8219	17.8843
O	2003	7	jul	2	3	0	22.2741	24.9977	20.1539	84.6158	73.1014	19.9488	3.17373	11.7652
O	2003	8	aug	2	3	2	24.2498	27.7682	21.3641	81.4775	66.7512	21.2739	5.1871	14.9706
O	2003	9	sep	3	4	9	22.0018	26.4229	18.4595	77.544	58.1952	20.937	6.36571	15.671
O	2003	10	oct	3	15	23	14.7641	20.5456	9.99124	65.6815	41.5161	6.66143	7.4576	14.761
O	2003	11	nov	3	8	5	11.2753	15.8281	7.07143	72.1435	52.9905	4.12904	4.53429	8.921
O	2003	12	dec	4	3	0	4.00121	8.26728	0.0801843	64.7133	45.023	2.29224	5.28571	8.09935
O	2004	1	jan	4	2	0	1.01373	5.89724	-2.82581	65.1607	42.5023	1.0495	5.98986	9.60032
O	2004	2	feb	4	0	0	4.218	9.81232	-0.955665	61.5376	36.202	6.56012	6.86897	13.6631
O	2004	3	mar	1	0	0	7.20845	13.1226	1.81659	58.9729	34.212	5.4332	6.84885	16.5774
O	2004	4	apr	1	2	0	12.7706	19.0019	6.73762	61.7024	34.9333	11.1421	7.29905	18.5993
O	2004	5	may	1	0	0	17.1556	21.4419	12.982	74.025	53.9539	7.80072	5.70276	17.4871
O	2004	6	jun	2	0	0	21.3272	26.0114	17.2943	74.2448	55.3714	20.7701	5.84762	18.03
O	2004	7	jul	2	1	0	25.4838	29.1843	22.5332	82.207	67.0092	18.1754	6.14885	18.2206
O	2004	8	aug	2	0	2	25.6373	29.9742	22.2129	78.9146	60.6636	32.1504	6.64147	18.8516
O	2004	9	sep	3	2	10	21.8243	26.05	18.561	77.6587	59.3619	17.8264	4.26381	13.287
O	2004	10	oct	3	16	23	15.2779	21.465	10.012	66.1137	38.9447	0.5875	7.68618	15.5542
O	2004	11	nov	3	4	1	10.0954	15.9619	5.19762	71.9371	45.5048	8.68857	6.26905	10.46
O	2004	12	dec	4	0	0	5.08984	9.89677	0.773272	64.0837	43.1521	4.77321	5.35023	8.16935
O	2005	1	jan	4	0	0	0.596947	4.38203	-2.7553	63.1955	44.2396	1.32314	5.07097	8.58065
O	2005	2	feb	4	0	0	1.12721	5.18316	-2.4449	64.2338	46.2347	3.53489	5.28367	10.8104
O	2005	3	mar	1	0	0	5.16767	10.4908	0.414286	63.6225	40.3871	7.1422	7.01429	16.2761
O	2005	4	apr	1	0	0	12.8383	18.7195	7.34238	65.0712	39.9524	13.2221	8.21857	20.8153
O	2005	5	may	1	1	0	17.3051	22.9129	12.0668	68.7857	44.53	18.1102	8.44885	21.5342
O	2005	6	jun	2	2	0	22.3406	26.7686	18.7105	79.8351	59.7143	21.5104	6.62238	18.641
O	2005	7	jul	2	0	0	24.9176	28.5627	22.0659	85.1085	70.0783	13.1687	4.84332	16.2987
O	2005	8	aug	2	0	3	25.3877	29.1369	22.5346	82.4426	66.0829	12.4726	5.34194	16.3268
O	2005	9	sep	3	3	8	22.9864	27.0943	19.7819	79.2093	61.6048	6.42403	4.7481	14.137
O	2005	10	oct	3	14	6	15.6234	21.2949	10.8839	70.7669	45.7512	2.81414	6.1212	13.0345
O	2005	11	nov	3	7	3	9.79327	15.5252	4.82905	66.1784	40.4857	8.1182	6.15095	10.595
O	2005	12	dec	4	4	0	0.214267	4.63456	-3.81751	68.2715	48.3825	3.13514	5.20645	7.77419
O	2006	1	jan	4	1	0	2.34608	6.77005	-1.48756	66.8191	46.4378	2.93344	4.72488	8.35806
O	2006	2	feb	4	0	0	2.25077	7.01735	-2.24847	65.3289	42.0867	3.89311	5.22806	11.2796
O	2006	3	mar	1	1	0	6.59969	12.2198	1.15438	61.9387	36.2627	2.75	7.1023	16.4865
O	2006	4	apr	1	0	0	11.5558	16.449	6.6619	69.7339	46.881	11.3131	5.87476	16.3293
O	2006	5	may	1	1	0	16.8649	21.6323	12.6636	76.4612	54.1521	20.0876	5.20276	15.991
O	2006	6	jun	2	0	0	21.0298	25.4781	17.3586	79.4879	59.1619	21.3931	5.81381	18.319
O	2006	7	jul	2	0	0	23.9358	26.8599	21.6783	86.9595	75.2903	24.9113	2.88894	12.9939
O	2006	8	aug	2	0	2	26.918	31.4009	23.6806	80.5334	60.5438	12.8154	6.86498	19.2181
O	2006	9	sep	3	3	1	20.1477	25.029	16.1857	75.576	52.3238	8.83338	5.64238	15.0253
O	2006	10	oct	3	11	8	17.6108	24.2567	12.577	74.7467	44.1935	8.09238	7.14562	14.441
O	2006	11	nov	3	10	5	10.7488	15.5929	6.17714	66.8597	44.8952	4.49136	4.94	9.19567
O	2006	12	dec	4	1	0	4.03998	8.95346	0.0764977	69.7093	47.1751	3.50624	5.09263	7.85161
O	2007	1	jan	4	0	0	2.48387	7.27742	-1.57558	65.5015	42.3272	1.43986	4.70553	8.61226
O	2007	2	feb	4	0	0	5.49447	11.3939	0.415306	67.4014	41.648	8.93602	6.67806	12.4743
O	2007	3	mar	1	1	0	7.86365	13.0558	3.23456	67.501	44.7512	11.0242	5.41705	14.1619
O	2007	4	apr	1	0	0	11.8783	17.4962	6.29524	62.4095	35.9571	6.12928	6.93095	18.707
O	2007	5	may	1	0	0	17.4834	22.7341	12.7369	70.515	44.2028	14.8947	7.5235	20.9787
O	2007	6	jun	2	0	0	21.2103	24.9933	18.021	78.9161	61.981	2.96628	4.48	16.0643
O	2007	7	jul	2	1	0	24.0085	27.5074	21.3396	83.2383	67.8571	18.2441	4.01751	16.601
O	2007	8	aug	2	1	1	26.4337	29.9078	23.7871	83.9507	68.129	18.4583	5.1977	17.3355
O	2007	9	sep	3	1	10	22.0671	25.3967	19.3543	83.1206	66.8333	27.4223	3.40905	11.7987
O	2007	10	oct	3	8	16	16.0232	21.2184	11.665	72.6907	48.0046	12.8534	6.33502	13.9065
O	2007	11	nov	3	19	10	8.58982	14.4257	3.60952	65.1688	40.3143	0.635918	6.1419	10.4387
O	2007	12	dec	4	1	0	4.8187	9.04654	1.09724	71.2613	51.3687	3.57693	3.72811	6.57161
O	2008	1	jan	4	2	0	1.9043	5.63041	-1.18525	65.4746	45.7097	4.87375	4.34424	7.39452
O	2008	2	feb	4	0	0	1.17289	6.20788	-3.29064	55.7622	33.7094	3.47261	7.34089	12.9321
O	2008	3	mar	1	0	0	7.63385	13.112	2.4788	65.1147	39.0138	5.65948	6.67465	15.4574
O	2008	4	apr	1	0	0	13.0231	18.329	7.99952	67.9102	41.6857	6.60003	6.19714	18.6357
O	2008	5	may	1	0	0	17.1949	22.4848	12.1101	69.9672	45.659	15.9848	6.76313	20.0565
O	2008	6	jun	2	0	0	20.4535	23.8414	17.6233	79.4379	63.8667	19.6492	2.9219	15.6907
O	2008	7	jul	2	0	0	26.1336	29.6157	23.3714	83.2693	66.9447	9.83572	4.97834	16.9726
O	2008	8	aug	2	1	0	25.3569	29.3516	22.0991	78.774	60.0599	11.8297	6.3318	19.2248
O	2008	9	sep	3	2	2	22.6152	26.9876	18.9614	76.8153	55.4143	4.27703	4.84476	15.2667
O	2008	10	oct	3	4	9	17.0382	22.8783	12.1571	69.6006	43.2028	9.01399	6.06636	13.3384
O	2008	11	nov	3	4	1	9.43915	14.6114	4.85714	70.2014	44.6048	2.76614	5.06905	9.42733
O	2008	12	dec	4	4	0	3.94324	9.09816	-0.599539	67.1838	45.1567	1.60231	5.13687	7.9829
O	2009	1	jan	4	0	0	1.17373	6.41244	-3.16267	66.0442	41.8157	1.37052	4.71429	8.61839
O	2009	2	feb	4	0	0	5.53061	10.9622	0.569388	66.9566	39.7551	6.8247	4.78724	10.4021
O	2009	3	mar	1	0	0	7.69862	13.3465	2.31429	62.4498	36.8848	8.1663	6.07373	15.4652
O	2009	4	apr	1	2	0	12.6957	19.1638	6.80286	61.8233	32.9238	16.6786	7.86333	19.674
O	2009	5	may	1	0	0	18.018	24.3668	12.3424	66.7862	38.4101	14.5864	8.05207	21.8665
O	2009	6	jun	2	0	0	21.561	26.2495	17.6638	75.7467	53.4333	13.0148	6.05952	19.3597
O	2009	7	jul	2	0	0	24.0954	27.6585	21.2124	83.3396	67.1705	26.7291	3.4576	14.909
O	2009	8	aug	2	0	0	24.9364	28.9654	21.624	78.7687	60.1659	8.36417	4.8235	16.6174
O	2009	9	sep	3	1	2	21.889	27.1081	17.889	75.1005	50.8714	5.41293	6.02095	16.2523
O	2009	10	oct	3	8	2	16.4495	22.8894	11.2539	67.8523	38.106	8.15624	7.2553	14.5061
O	2009	11	nov	3	15	4	9.42381	14.5819	5.31333	68.8062	46.7143	4.97626	4.75667	9.34233
O	2009	12	dec	4	2	0	3.29124	7.84194	-0.722581	65.1092	42.7373	2.27624	4.66544	7.52935
K	2001	1	jan	4	0	0	-5.02966	-0.250538	-9.73297	59.7602	38.5376	4.08189	4.71756	7.82387
K	2001	2	feb	4	0	0	-1.13457	4.0627	-6.07024	61.3824	37.8452	4.70267	5.53492	10.3098
K	2001	3	mar	1	0	0	3.94988	9.59498	-1.39283	53.6773	29.9498	1.63418	6.4914	13.7573
K	2001	4	apr	1	0	0	11.995	18.5048	5.31556	48.7159	25.9778	3.51594	8.27481	17.2413
K	2001	5	may	1	3	0	17.5979	23.4577	12.0559	57.8886	35.638	2.11113	7.91004	17.2513
K	2001	6	jun	2	1	0	20.911	25.6381	16.9044	70.8707	52.5111	11.4747	5.79778	14.3495
K	2001	7	jul	2	0	0	24.4245	28.7362	20.6846	75.155	56.9713	19.6703	6.24086	14.3566
K	2001	8	aug	2	2	0	23.6644	28.6484	19.6043	74.8892	54.4731	7.66231	7.64588	16.3524
K	2001	9	sep	3	0	0	18.761	24.483	13.6004	70.1449	47.163	9.50128	6.7837	13.7152
K	2001	10	oct	3	4	3	13.9364	19.6176	9.52258	72.063	47.1613	10.8788	5.32616	9.65113
K	2001	11	nov	3	3	1	5.16488	11.19	0.209259	59.7023	33.6926	3.86161	6.20148	8.3355
K	2001	12	dec	4	3	0	-1.80312	3.72724	-6.61756	52.1328	28.319	2.27974	6.15735	7.64145
K	2002	1	jan	4	0	0	-1.54228	2.95269	-5.87563	63.8014	44.3692	4.50156	5.06057	7.46161
K	2002	2	feb	4	1	0	1.29656	6.95516	-3.97778	51.5038	28.0873	0.375287	6.64921	11.0854
K	2002	3	mar	1	0	0	7.00536	12.8229	1.11398	51.1815	27.2043	3.19506	6.63082	13.5668
K	2002	4	apr	1	1	0	12.2609	18.3678	6.08963	52.3086	29.963	14.1054	7.65667	17.1652
K	2002	5	may	1	1	0	15.9424	21.5803	10.5147	64.674	41.3799	7.55609	7.39462	18.4913
K	2002	6	jun	2	2	0	19.7831	25.1267	14.5067	66.5438	43.8185	6.30462	7.76556	18.794
K	2002	7	jul	2	0	0	22.8761	26.724	19.595	77.2386	62.0789	13.463	4.67957	13.3395
K	2002	8	aug	2	0	0	22.3616	25.7627	19.7466	79.5329	65.6918	31.0362	3.30179	10.7171
K	2002	9	sep	3	1	1	18.1337	23.3104	13.9093	75.3207	54.1889	8.91946	5.63852	12.9282
K	2002	10	oct	3	5	2	10.9221	16.6219	6.04444	64.8713	38.7276	8.37751	5.89498	11.6126
K	2002	11	nov	3	3	0	2.76827	7.6663	-1.91556	53.5779	32.8148	0.813232	5.7363	9.55233
K	2002	12	dec	4	0	0	-0.599447	4.06882	-4.49606	67.9963	46.8889	5.35988	4.36452	6.76581
K	2003	1	jan	4	0	0	-4.27461	0.642294	-8.8681	61.7497	40.6667	3.61983	5.14946	8.45032
K	2003	2	feb	4	0	0	0.190625	4.89246	-4.04643	68.515	45.754	4.48629	5.03651	9.92786
K	2003	3	mar	1	0	0	4.1657	9.12151	-0.54086	64.2212	41.4731	4.01065	5.53441	13.1044
K	2003	4	apr	1	0	0	10.8909	16.4778	5.58333	63.2272	40.3111	14.0565	5.86926	15.151
K	2003	5	may	1	0	0	16.1183	22.0165	10.6889	67.2569	44.448	18.3322	7.21971	18.1384
K	2003	6	jun	2	0	0	20.0036	24.6356	15.9556	72.081	51.937	10.6681	5.69259	16.604
K	2003	7	jul	2	0	0	21.5156	25.3287	18.4251	79.9208	63.6487	14.3925	4.24014	14.2811
K	2003	8	aug	2	0	0	22.3841	26.3079	19.3179	80.9952	63.3369	20.5289	4.18781	12.8539
K	2003	9	sep	3	1	0	18.8249	23.1948	15.3537	79.7691	59.863	24.3235	4.30778	11.8367
K	2003	10	oct	3	6	0	11.6266	18.0301	6.40215	64.1272	37.4337	6.19198	6.51219	12.3902
K	2003	11	nov	3	4	0	7.77889	12.5174	3.52037	68.6826	48.8556	9.13947	3.79259	7.12533
K	2003	12	dec	4	6	1	-0.155406	4.73369	-4.60072	54.8938	31.9319	1.81481	5.92366	8.47435
K	2004	1	jan	4	1	0	-3.06767	2.35305	-7.72939	54.9028	32.1792	2.98574	6.43441	9.68161
K	2004	2	feb	4	1	0	1.12399	6.53563	-3.95632	50.6346	26.6015	3.79165	6.82222	12.4197
K	2004	3	mar	1	1	0	5.08483	10.7817	-0.671326	47.264	24.0036	3.32704	7.53082	16.3198
K	2004	4	apr	1	1	1	12.0429	18.343	5.69	50.6361	25.6593	10.7357	7.6537	17.8257
K	2004	5	may	1	0	0	16.5344	21.6631	11.6609	67.0391	43.7384	5.76255	6.31828	17.3019
K	2004	6	jun	2	2	0	20.9939	26.0778	16.2796	69.9972	47.9593	17.4606	6.57778	18.4912
K	2004	7	jul	2	0	2	23.7102	27.2194	20.9222	82.6831	66.8495	21.3784	4.10287	12.8485
K	2004	8	aug	2	1	1	23.1375	27.3477	19.6563	78.6487	60.0251	19.1074	5.27634	14.9027
K	2004	9	sep	3	1	0	19.2967	24.1893	15.3893	77.2077	54.1074	12.2052	5.44481	14.2458
K	2004	10	oct	3	5	3	12.5948	19.347	6.89785	65.603	37	1.91435	6.96308	14.0126
K	2004	11	nov	3	2	0	7.63886	13.4207	2.88519	65.0826	39.4444	3.91768	5.71185	9.22933
K	2004	12	dec	4	3	0	1.05865	6.64839	-3.48315	59.573	33.4194	2.5864	5.77097	8.36097
K	2005	1	jan	4	1	0	-3.30397	2.0233	-8.39247	51.2849	28.8423	3.37993	6.43763	9.93629
K	2005	2	feb	4	0	0	-2.98228	2.02619	-7.94524	51.6835	30.504	5.68611	6.21786	11.9348
K	2005	3	mar	1	0	0	3.15421	8.49606	-2.06129	55.3704	29.9892	6.62512	7.27921	15.8344
K	2005	4	apr	1	0	0	12.2592	18.1167	6.10815	51.9565	27.9815	6.03779	7.67222	18.6962
K	2005	5	may	1	1	0	15.5103	21.3688	9.85806	62.4104	38.1039	7.20412	7.84265	19.7519
K	2005	6	jun	2	0	0	21.4671	26.3022	17.1411	71.39	49.863	11.8062	6.21852	18.0337
K	2005	7	jul	2	1	0	24.1069	27.9599	21.005	77.8723	61.6201	15.7942	5.09892	15.7113
K	2005	8	aug	2	0	0	24.006	28.1168	20.8125	77.1665	59.8029	15.387	4.66774	15.0797
K	2005	9	sep	3	0	0	19.5729	23.8311	16.0478	78.3514	58.8815	19.7142	4.31704	12.3263
K	2005	10	oct	3	3	2	12.885	18.6409	8.43763	70.6596	43.3763	7.03608	5.58495	12.1777
K	2005	11	nov	3	7	1	6.72153	12.5704	1.82259	58.5722	32.1037	4.37867	6.0963	9.96267
K	2005	12	dec	4	0	0	-4.73659	0.516129	-9.6914	49.1365	26.7921	0.499199	6.55197	9.27452
K	2006	1	jan	4	0	0	-1.93987	3.17133	-6.3448	61.0448	37.638	5.18266	5.07599	8.75177
K	2006	2	feb	4	0	0	-0.473611	4.56587	-5.24087	54.5192	30.7302	2.22967	6.08294	11.897
K	2006	3	mar	1	1	0	4.46682	10.0699	-1.23226	49.437	24.9391	1.29221	6.93978	15.8865
K	2006	4	apr	1	1	0	9.8242	14.9796	5.0637	58.7137	36.7852	6.89538	4.78593	14.4395
K	2006	5	may	1	1	0	16.1307	21.5384	11.0932	65.3309	42.2043	12.005	6.08853	18.1185
K	2006	6	jun	2	1	0	20.0427	24.9685	15.86	72.402	50.4074	10.9905	5.67333	17.6258
K	2006	7	jul	2	3	0	21.6738	24.8401	19.1907	82.9619	69.2509	31.7254	1.98244	10.4098
K	2006	8	aug	2	0	1	25.1183	29.59	21.6104	75.647	55.4373	10.776	5.94373	17.5089
K	2006	9	sep	3	1	0	18.1683	23.7207	13.4781	72.7437	47.9037	7.83268	6.04852	15.587
K	2006	10	oct	3	2	2	15.4043	21.3	10.6072	71.8096	45.5627	17.273	5.54158	11.4694
K	2006	11	nov	3	1	0	6.59211	11.4863	1.99444	64.1529	40.4593	5.66642	4.5063	8.4375
K	2006	12	dec	4	5	0	-0.195415	5.03226	-4.32867	63.2204	40	3.76865	5.1319	7.78484
K	2007	1	jan	4	0	0	-1.1059	4.45341	-5.48638	60.4521	35.2115	1.79464	5.75018	8.72435
K	2007	2	feb	4	0	0	2.2413	8.46032	-3.09484	59.7345	33.8849	2.7095	5.99524	11.0134
K	2007	3	mar	1	1	1	4.99159	10.0875	0.313978	62.6417	40.1541	7.45541	5.20323	12.9958
K	2007	4	apr	1	0	0	10.4864	15.9341	4.9737	57.331	31.5593	3.01334	5.99148	16.4345
K	2007	5	may	1	0	0	16.7647	22.3326	11.6699	63.9211	38.681	8.69298	6.581	18.7182
K	2007	6	jun	2	0	0	20.7668	26.0404	15.6063	68.8323	47.3704	6.56967	6.36333	19.5978
K	2007	7	jul	2	0	0	22.3876	25.9208	19.5473	80.42	64.8853	12.8796	3.519	14.3079
K	2007	8	aug	2	2	2	24.741	28.7276	21.5405	79.2225	61.4552	15.2224	3.72724	13.4671
K	2007	9	sep	3	1	1	19.939	23.6981	16.967	80.1478	62.5519	17.8609	2.5563	9.85567
K	2007	10	oct	3	4	0	13.4487	18.8685	9.16774	72.1229	46.3297	2.47307	4.83584	11.374
K	2007	11	nov	3	3	0	5.41387	11.0737	0.603704	62.916	36.8556	3.15455	5.64556	9.20583
K	2007	12	dec	4	1	0	0.368056	4.95161	-3.46308	62.3065	41.233	0.809282	4.85735	7.38387
K	2008	1	jan	4	1	0	-2.58477	2.30538	-7.02401	61.0853	36.9857	4.24	4.81541	8.25258
K	2008	2	feb	4	1	0	-2.10766	3.79119	-7.66897	48.799	25.2529	1.16296	7.36897	13.1774
K	2008	3	mar	1	0	0	5.46502	10.8728	0.516129	65.1443	40.2151	6.06756	5.28495	13.3279
K	2008	4	apr	1	1	0	12.138	18.0537	6.33667	58.7533	34.4222	3.02358	6.4563	17.5568
K	2008	5	may	1	0	0	16.5858	22.1939	11.071	62.8776	38.129	8.17911	6.45914	19.1134
K	2008	6	jun	2	2	0	19.2075	23.9759	14.7919	73.2508	53.4074	8.57935	5.53148	18.426
K	2008	7	jul	2	0	0	24.9421	28.6935	21.8341	78.109	61.1505	23.221	3.82545	15.3439
K	2008	8	aug	2	2	0	23.2364	27.7871	19.3272	78.6315	58.1577	17.2218	6.0362	17.5273
K	2008	9	sep	3	0	0	19.6431	25.0822	15.4115	76.9401	50.7815	10.3955	5.76	14.7028
K	2008	10	oct	3	5	0	14.4699	20.4789	9.65627	70.3908	42.4301	5.50022	5.99821	11.9185
K	2008	11	nov	3	5	1	6.27887	11.3374	1.69556	62.8264	38.2444	3.96858	4.96815	8.73933
K	2008	12	dec	4	5	1	0.595724	5.27133	-3.78566	59.5068	36.9821	3.87768	5.26667	7.74855
K	2009	1	jan	4	0	0	-3.24428	2.71584	-8.339	55.1587	31.1371	2.69816	6.35601	9.40048
K	2009	2	feb	4	0	0	2.35747	7.57565	-2.38019	60.1893	33.9673	3.67281	4.78084	10.3181
K	2009	3	mar	1	0	0	5.21173	10.5472	-0.0964809	57.9032	31.707	4.74841	5.79677	14.4369
K	2009	4	apr	1	1	0	11.1655	17.8058	4.86424	56.4667	30.125	7.17129	7.14242	18.0692
K	2009	5	may	1	3	0	17.1971	23.3897	11.5821	61.7343	34.0081	7.19704	7.25161	19.2949
K	2009	6	jun	2	2	0	20.3358	25.3933	15.7733	70.9361	46.5583	8.33138	6.02273	18.8052
K	2009	7	jul	2	0	0	22.0909	26.5493	18.6246	80.0455	58.3629	26.1182	4.14428	16.0738
K	2009	8	aug	2	0	0	22.6208	27.2504	18.7501	77.3845	55.5081	18.1213	4.83255	15.6574
K	2009	9	sep	3	2	0	18.8052	24.5327	14.2239	75.4542	47.2417	5.24408	5.96727	15.7982
K	2009	10	oct	3	3	0	13.6449	20.0748	8.31789	65.9012	35.6425	4.30826	6.69531	12.9843
K	2009	11	nov	3	3	0	5.86	10.3355	1.80515	66.7658	46.3583	8.88517	3.99424	7.35358
K	2009	12	dec	4	1	0	-1.08856	3.66598	-5.39501	58.4173	36.5941	2.52699	4.97331	7.53782
S	2001	1	jan	4	6	1	-4.17836	-1.06129	-7.53871	62.0121	48.4194	2.81429	3.12903	6.63871
S	2001	2	feb	4	4	0	-0.32753	3.26071	-3.475	60.0908	39.75	5.07778	4.17857	9.15393
S	2001	3	mar	1	0	0	4.91304	9.00968	1.11613	51.3306	34.2903	2.01111	4.87097	12.7913
S	2001	4	apr	1	0	0	13.4589	18.5633	8.96333	49.6167	30	1.75714	5.92667	16.4013
S	2001	5	may	1	3	2	19.0185	23.9806	15.0323	60.371	36.7419	1.65	5.26129	16.2719
S	2001	6	jun	2	3	0	22.4604	26.4467	19.3133	69.9097	53.9667	8.74444	3.36333	11.977
S	2001	7	jul	2	0	0	25.8348	29.2774	23.1419	75.5538	58.5161	34.92	2.65806	10.4087
S	2001	8	aug	2	1	1	26.4273	30.4806	22.9935	69.043	50.9032	19.3846	5.44194	13.9245
S	2001	9	sep	3	1	1	22.4447	27.1833	18.2067	58.1222	39	6.1625	5.98667	13.522
S	2001	10	oct	3	6	3	16.4653	20.7548	12.6258	65.2527	44.7419	6.82	4.09032	9.17323
S	2001	11	nov	3	12	1	7.07139	11.3133	3.06	58.4306	37.8	1.625	3.93667	7.86033
S	2001	12	dec	4	7	2	-0.561425	3.19677	-3.74194	48.9449	31.9355	1.74444	3.96452	7.62516
S	2002	1	jan	4	2	0	0.272715	3.60323	-2.75806	63.2272	46.3548	3.4	3.24194	6.57032
S	2002	2	feb	4	1	0	2.88735	6.81786	-0.678571	54.8527	32.0714	0.4	3.71071	10.8811
S	2002	3	mar	1	1	0	7.58737	11.9387	3.75161	54.6586	30.3871	3.9375	4.14839	14.6971
S	2002	4	apr	1	1	0	13.5165	18.2633	8.95	53.3264	30.9667	19.3875	5.74667	17.9687
S	2002	5	may	1	0	0	18.1574	23.1935	13.4226	61.8293	40.4516	6.44444	5.64516	18.36
S	2002	6	jun	2	0	0	22.2339	27	18.05	61.4375	39.5333	6.14	5.43	18.9393
S	2002	7	jul	2	1	0	25.2223	28.5032	22.2355	74.2957	60.1613	11.03	2.7129	12.8684
S	2002	8	aug	2	1	0	24.2134	27.3258	21.4516	78.9301	64.0323	29.913	1.69032	10.1548
S	2002	9	sep	3	0	0	21.5433	25.8267	17.9367	66.8167	45.6333	5.55455	3.98	13.06
S	2002	10	oct	3	6	2	12.7995	17.3419	8.93226	60.4704	36.2258	3.75	4.73226	12.6481
S	2002	11	nov	3	4	1	4.02611	7.64	0.413333	55.3681	36.4	1.38889	3.15	8.266
S	2002	12	dec	4	3	0	1.69234	5.08387	-1.45161	59.3199	41.7742	1.5	2.6129	6.78
S	2003	1	jan	4	3	0	-2.5496	0.909677	-5.74839	60.1304	41	1.7625	2.97742	7.82161
S	2003	2	feb	4	1	0	2.64315	6.35357	-0.607143	61.4717	40.1786	3.6	3.39286	9.84607
S	2003	3	mar	1	2	0	6.45121	10.2839	2.96452	58.1223	36.8387	2.23333	3.36452	12.6148
S	2003	4	apr	1	1	0	13.1492	17.56	9.08667	59.6556	38.5667	11.6333	4.19333	14.6887
S	2003	5	may	1	1	0	19.5156	24.6903	14.5	56.9677	36.871	17.6667	5.50645	18.9048
S	2003	6	jun	2	1	0	21.5518	25.4867	18.0633	68.6139	51.9	12	3.39333	14.0783
S	2003	7	jul	2	0	0	23.829	27.3871	20.7839	75.1277	58.4839	22.3714	2.79355	13.5723
S	2003	8	aug	2	1	2	24.0761	27.4355	21.3677	77.0551	60.5484	31.1	2.67742	12.6445
S	2003	9	sep	3	2	1	20.8972	24.6267	17.6067	72.3708	53.1333	23.4727	3.34667	12.4457
S	2003	10	oct	3	3	0	13.939	18.6806	9.70968	60.9973	37.3548	5.92857	6.3129	11.9045
S	2003	11	nov	3	8	1	9.53306	13.2433	5.98333	66.1	48.9667	5.33077	3.8	6.01667
S	2003	12	dec	4	5	1	0.763038	4.08387	-2.72258	58.5645	39.9677	0.985714	5.80968	6.72806
S	2004	1	jan	4	4	0	-1.52513	1.89032	-4.75484	59.2836	39.871	2.82857	5.69032	7.57
S	2004	2	feb	4	0	0	2.29784	6.56897	-1.45517	55.9181	31.8276	5.46	6.41724	10.5686
S	2004	3	mar	1	1	0	6.26438	10.7742	2.24516	48.8024	26.7742	3.94286	7.14839	15.0297
S	2004	4	apr	1	2	0	13.1154	17.87	8.70667	50.9181	29.6333	7.41	7.01	17.2027
S	2004	5	may	1	3	0	17.6012	21.829	13.8065	67.5081	46.9032	9.36111	5.38387	16.3629
S	2004	6	jun	2	0	0	23.1932	27.44	19.4233	63.9931	46.2667	13.81	5.05	15.8427
S	2004	7	jul	2	0	2	24.8199	27.5258	22.3613	81.6237	68.6774	25.535	2.75484	10.2252
S	2004	8	aug	2	0	0	26.1055	29.871	22.9194	70.4005	53.7742	16.1083	4.76774	15.139
S	2004	9	sep	3	1	0	21.7082	25.98	17.9033	68.8833	46.2333	14.1929	5.60667	13.8587
S	2004	10	oct	3	1	1	15.2169	20.4387	10.3645	54.5712	32.4839	2.16667	8.14839	13.9761
S	2004	11	nov	3	3	2	9.12153	13.12	5.39667	65.6125	43.4667	7.27273	5.22333	7.799
S	2004	12	dec	4	2	0	1.92352	5.45806	-1.32581	56.1815	36.3226	3.88571	6.22903	7.28387
S	2005	1	jan	4	1	0	-2.49113	1.26774	-6.07742	52.1492	33.5161	0.45	6.17742	8.26419
S	2005	2	feb	4	1	0	-1.95074	1.93214	-5.37143	49.3824	30.5714	2.45714	6.35	11.1043
S	2005	3	mar	1	0	0	4.09288	8.49677	0.222581	54.4906	30.8387	1.78571	7.15806	15.049
S	2005	4	apr	1	2	0	13.1621	17.84	9.03667	53.3069	29.4667	10.5222	6.65	17.2697
S	2005	5	may	1	2	0	17.7207	22.6323	13.1	54.914	32.7742	10.725	7.59032	19.4813
S	2005	6	jun	2	2	0	22.6515	26.95	19.2267	68.8403	47.8	12.0357	4.61	15.5037
S	2005	7	jul	2	1	0	25.2921	28.5194	22.7452	76.2688	61.1935	16.8375	2.56129	11.9745
S	2005	8	aug	2	2	2	25.1226	28.4484	22.4516	75.2648	59.6129	14.25	3.32581	11.8981
S	2005	9	sep	3	1	0	21.8075	25.37	18.6767	70.8042	52.0333	22.3786	3.79	11.1367
S	2005	10	oct	3	4	0	14.687	19.1323	10.8097	64.6989	39.9355	7.51429	6.45161	11.8707
S	2005	11	nov	3	3	1	8.55264	12.6267	4.74667	55.3125	32.6	3.43077	5.75	8.73233
S	2005	12	dec	4	4	0	-3.89718	-0.367742	-7.23226	51.4718	32.3226	1.14444	6.80333	8.035
S	2006	1	jan	4	0	0	-0.199866	3.12903	-3.15161	56.293	38.2581	4.2875	5.19677	7.34161
S	2006	2	feb	4	2	0	0.091369	3.9	-3.93214	52.5744	31.3214	1.9625	6.16429	10.6043
S	2006	3	mar	1	2	0	5.13253	9.53548	1.04516	50.4583	27.3226	1.16667	6.5129	14.1748
S	2006	4	apr	1	2	0	11.5289	15.8633	7.8	54.7681	33.8667	4.31667	4.53333	13.5737
S	2006	5	may	1	2	0	18.4347	23.0323	14.0742	57.5538	36.8387	17.3556	6.42258	17.4694
S	2006	6	jun	2	0	0	21.7985	26.0233	18.1433	67.8736	47.7	12.9615	5.19333	15.6413
S	2006	7	jul	2	0	1	23.1191	25.7194	20.9065	81.7083	68.6452	39	1.10645	8.16613
S	2006	8	aug	2	1	0	27.0468	30.8161	24.0387	69.0538	51.5161	8.08	5.7129	15.6042
S	2006	9	sep	3	1	0	21.1058	25.4067	17.0033	58.1625	38.6333	1.23333	6.52333	14.8083
S	2006	10	oct	3	4	0	17.9358	22.3581	14.0065	62.1492	40.7742	6.04	5.97419	11.0803
S	2006	11	nov	3	2	1	8.34986	12.1	4.64333	57.5361	38.2333	3.96667	5.11667	7.69633
S	2006	12	dec	4	3	0	1.43535	5.10323	-1.97742	58.3441	39.7097	2.1625	5.14194	6.57742
S	2007	1	jan	4	0	0	0.41828	3.84839	-2.67419	56.289	37.4516	1.8	5.86774	7.49484
S	2007	2	feb	4	0	0	3.95	8.32857	0.142857	52.8185	30.3571	1.8	6.125	10.0675
S	2007	3	mar	1	0	0	6.03669	9.99677	2.32581	59.6452	37.7742	7.26471	4.74516	10.3852
S	2007	4	apr	1	1	0	11.3499	15.6533	7.62667	52.9639	28.8	3.16154	6.39333	15.8213
S	2007	5	may	1	0	0	18.0974	22.9581	13.6903	62.078	37.0645	10.5846	6.36452	16.8823
S	2007	6	jun	2	0	0	23.1782	27.39	19.3667	60.7764	43.0667	3.63333	5.84	16.7147
S	2007	7	jul	2	0	0	24.1515	27.4484	21.3548	74.8777	58.2258	13.705	2.95161	12.5916
S	2007	8	aug	2	0	0	26.4618	29.5903	23.9097	74.8011	58.7097	11.3143	3.40968	11.639
S	2007	9	sep	3	2	0	21.5274	24.78	18.71	73.7042	56.6	11.519	2.83667	9.566
S	2007	10	oct	3	0	0	15.0595	19.2903	11.3742	62.8091	41.9032	3.59091	5.5129	10.6555
S	2007	11	nov	3	5	3	6.75389	11.0233	2.93333	54.7736	33.1333	3.3	6.28333	8.72367
S	2007	12	dec	4	5	0	1.75108	5.13871	-1.27742	60.3065	43	0.907143	4.54194	6.25742
S	2008	1	jan	4	3	0	-1.68508	1.7129	-4.93226	49.8575	30.8387	4.425	5.37097	7.31097
S	2008	2	feb	4	0	0	-1.17687	2.74828	-4.71379	45.7601	26	3	7.73103	11.9297
S	2008	3	mar	1	2	0	7.31358	11.4677	3.78065	56.1815	33.3548	3.85	6.04194	12.5897
S	2008	4	apr	1	0	1	14.0775	19.09	9.44667	50.3347	28.9	3.20833	6.93667	16.5657
S	2008	5	may	1	2	0	17.6406	22.3355	13.2323	58.0847	35.2903	9.77	6.89677	18.0806
S	2008	6	jun	2	1	0	21.5206	25.7433	17.73	65.2292	47.5333	12.6923	5.79333	17.371
S	2008	7	jul	2	2	0	25.1101	28.1387	22.629	78.3306	63.3548	27.9368	2.53871	10.8461
S	2008	8	aug	2	0	1	25.2931	29.1258	21.8774	69.3548	50.7742	15.7	6.34194	15.9216
S	2008	9	sep	3	2	2	22.0451	26.5133	18.1233	63.9208	42.9667	14.1714	6.15333	13.8437
S	2008	10	oct	3	1	2	16.1474	20.6774	12.2323	61.7043	38.5806	5.97143	5.97097	10.8652
S	2008	11	nov	3	5	0	7.59889	11.3167	3.9	57.9139	37.8667	2.8	5.65667	8.15067
S	2008	12	dec	4	2	0	1.08696	4.64194	-2.55806	55.8562	37.6774	1.61875	5.06452	6.57677
S	2009	1	jan	4	3	1	-1.96452	2.31935	-5.46129	50.0258	30.6452	1.14	6.79355	8.49419
S	2009	2	feb	4	0	0	2.93929	6.76429	-0.614286	56.75	36.3571	3.69	4.48571	8.53536
S	2009	3	mar	1	0	0	6.0129	10.5581	1.75484	51.8871	28.9355	7.1	6.53871	13.7271
S	2009	4	apr	1	2	0	12.71	17.9867	8.12667	54.3667	31.2333	7.38889	6.81667	17.2553
S	2009	5	may	1	0	1	19.1258	24.2806	14.6129	58.6516	35.7742	12.1111	7.74839	19.7713
S	2009	6	jun	2	1	0	22.4267	26.7367	18.75	66.0333	43.7667	11	6.03333	18.305
S	2009	7	jul	2	1	0	24.3	28.171	21.0065	75.7968	55.8387	29.9727	3.73548	14.121
S	2009	8	aug	2	0	1	25.7032	29.5323	22.4484	69.0871	49.8065	17.8313	4.86774	15.019
S	2009	9	sep	3	3	1	21.75	26.33	17.6833	64.3667	40.4333	9.21429	6.72	15.7947
S	2009	10	oct	3	2	1	15.9742	20.8581	11.7452	61.9645	36.9032	8.3625	7.62258	13.429
S	2009	11	nov	3	3	0	6.89	10.3567	3.74667	63.9167	44.8	4.03077	4.33667	7.84633
S	2009	12	dec	4	1	0	-1.00968	2.5	-4.21935	60.2548	42.3226	1.95455	4.7129	7.05355
U	2001	1	jan	4	0	0	1.53696	5.27097	-1.72258	48.2137	30.9355	4.95	5.51613
U	2001	2	feb	4	0	0	4.32024	8.78929	0.128571	46.8661	29.3571	7.025	6.21071
U	2001	3	mar	1	0	0	8.44745	13.3935	3.66774	45.539	25.7419	1.04444	6.95806
U	2001	4	apr	1	0	0	14.3569	19.8433	8.59	50.575	27.2667	4	8.26
U	2001	5	may	1	0	0	19.0367	23.7742	14.6968	61.0591	40.5806	5.08182	6.70323
U	2001	6	jun	2	1	0	21.9836	25.87	18.5167	70.625	53.0667	14.5214	5.43667
U	2001	7	jul	2	0	0	26.6101	30.6968	23.0387	70.4476	52.0645	7.6	7.27419
U	2001	8	aug	2	0	0	26.1522	29.8387	23.2452	70.3038	52.8387	4.85556	5.92258
U	2001	9	sep	3	0	0	21.5064	25.0167	18.4233	69.4514	52.4333	4.725	5.24667
U	2001	10	oct	3	4	0	17.3487	21.5871	13.5774	68.0806	46.5161	7.56154	5.09032
U	2001	11	nov	3	0	2	9.93431	15.3633	5.21	50.7931	29.5667	2.2	7.12667
U	2001	12	dec	4	0	0	4.11156	8.33226	0.603226	41.1532	25.1613	5.2375	6.53871
U	2002	1	jan	4	0	0	4.55094	8.6	0.751613	48.3481	32.7742	3.81538	5.93871
U	2002	2	feb	4	0	0	5.75089	11.3036	0.810714	39.997	20.7143	1.2	7.32857
U	2002	3	mar	1	0	0	10.4823	15.4484	5.66129	49.332	28.0323	7.20833	6.78387
U	2002	4	apr	1	0	0	14.8533	19.59	9.92333	54.825	34.8333	9.12	6.54333
U	2002	5	may	1	0	0	17.3977	21.5806	13.5387	65.6694	44.3226	7.05625	6.02258
U	2002	6	jun	2	0	0	21.7569	26.3533	17.3567	62.3069	40.6333	4.38333	7.65
U	2002	7	jul	2	1	0	24.6401	28.1839	21.771	76.0417	59.6129	15.5524	4.56129
U	2002	8	aug	2	0	0	24.4759	27.6323	22.0323	76.0847	62.7419	32.9167	4.20645
U	2002	9	sep	3	2	0	20.739	24.7433	17.22	71.1389	50.8667	7.68462	5.59667
U	2002	10	oct	3	3	0	15.1743	20.3	10.5871	61.6989	39.9677	7.49167	6.79677
U	2002	11	nov	3	0	0	7.84167	12.9	3.12333	44.0903	25.3667	0.583333	7.46667
U	2002	12	dec	4	0	0	5.31828	9.30968	1.71613	53.2043	38.129	3.65385	5.35161
U	2003	1	jan	4	0	0	1.51774	6.23871	-2.67097	44.7567	26.4516	2.67	6.90645
U	2003	2	feb	4	0	0	4.98006	9.53929	1.07857	55.0387	34.5357	5.61111	5.575
U	2003	3	mar	1	0	0	7.94597	12.2516	3.56774	57.7742	38.3226	3.36667	5.54194
U	2003	4	apr	1	0	0	14.0735	18.3933	10.22	61.0208	40.2333	12.0462	5.64
U	2003	5	may	1	0	0	17.1218	21.6226	12.7452	68.8024	49.0645	29.4	5.92581
U	2003	6	jun	2	0	0	21.8633	26.1067	18.22	69.975	51.8	24.4545	4.93667
U	2003	7	jul	2	0	0	22.3052	25.2065	20.0839	79.918	67.7742	20.4261	1.80323
U	2003	8	aug	2	0	0	25.0255	28.8774	22.0484	75.0699	58.1613	11.155	4.50645
U	2003	9	sep	3	0	0	22.6531	26.7133	19.3033	72.075	55.9	7.64211	4.85
U	2003	10	oct	3	2	0	16.0972	21.7194	11.2871	54.8683	33.2581	0.9	7.54839
U	2003	11	nov	3	0	0	12.7296	16.89	8.86	65.1347	47.9333	7.63333	4.37667
U	2003	12	dec	4	0	0	4.8953	9.94516	0.619355	42.4973	24.0968	2.75	6.97097
U	2004	1	jan	4	0	0	2.43401	7.20645	-1.65484	40.7527	23.4194	2.14	6.85806
U	2004	2	feb	4	0	0	6.09555	11.5724	0.651724	41.0647	22.3448	8.51667	8.07241
U	2004	3	mar	1	0	0	8.89126	14.3581	3.72581	46.9987	25.4516	2.27778	7.56774
U	2004	4	apr	1	0	0	15.09	21.5533	9.43	50.1625	24.7667	12.45	8.01
U	2004	5	may	1	0	0	19.0348	23.3677	14.7323	63.5605	42.7742	6.93333	5.19677
U	2004	6	jun	2	0	0	22.0187	26.5833	17.54	63.9347	45.0667	18.3455	6.86
U	2004	7	jul	2	0	0	26.8077	30.9581	23.3355	69.7003	52.871	6.8	6.78065
U	2004	8	aug	2	0	0	25.4776	29.1032	22.3484	71.918	54.9355	16.5562	4.81613
U	2004	9	sep	3	0	0	21.9272	25.51	18.88	73.3056	54.7333	16.0941	3.86667
U	2004	10	oct	3	0	0	16.2685	20.9452	11.9387	60.7473	39.7419	0.957143	6.05484
U	2004	11	nov	3	0	0	11.9165	17.69	7.00667	57.0708	32.0667	9.24286	7.18667
U	2004	12	dec	4	0	0	6.6172	11.6	2.18065	47.2137	27.9032	5.12	6.26774
U	2005	1	jan	4	0	0	2.0211	6.53548	-1.78387	41.2728	22.6452	5.21429	6.53226
U	2005	2	feb	4	0	0	2.57128	6.85	-1.34286	43.4301	26.9286	3.44	5.81429
U	2005	3	mar	1	0	0	7.38051	12.6129	2.51613	51.3683	29.0323	9.35455	7.45484
U	2005	4	apr	1	0	0	15.0967	20.7967	9.81333	52.7389	28.5667	6.87143	7.11
U	2005	5	may	1	0	0	17.9114	23.2645	12.8581	60.7648	37.4516	6.575	7.75161
U	2005	6	jun	2	0	0	23.2701	27.69	19.3133	68.6278	49.7667	6.59091	7.02667
U	2005	7	jul	2	0	0	25.4497	29.1452	22.4032	74.7581	58.4516	9.25625	4.8871
U	2005	8	aug	2	0	0	26.2601	30.1161	23.0097	70.9126	53.6129	13.1625	5.74516
U	2005	9	sep	3	0	0	22.5094	25.9667	19.7633	75.0194	58.2667	21.7889	3.59
U	2005	10	oct	3	0	0	16.5509	21.1645	12.4806	63.2083	43.5484	1.35556	5.36129
U	2005	11	nov	3	0	0	10.6703	16.7533	5.32333	48.9167	25.5667	4.9	7.61
U	2005	12	dec	4	1	0	1.17728	5.98387	-3.12258	35.9301	20.3871	0.183333	7.52581
U	2006	1	jan	4	0	0	3.61586	8.01613	-0.270968	48.0309	30.6774	3.4	5.28387
U	2006	2	feb	4	0	0	4.08705	8.83571	-0.55	47.9851	28.1786	3.02727	6.44643
U	2006	3	mar	1	0	0	8.38522	13.6806	3.24516	47.5995	25.129	3.5	7.28065
U	2006	4	apr	1	0	0	13.0069	17.64	8.42333	58.3875	37.7667	10.3923	5.77
U	2006	5	may	1	0	0	17.5161	22.1129	13.6581	66.5914	44.6129	14.7929	5.62581
U	2006	6	jun	2	0	0	21.8276	26.54	17.6767	67.7667	47.6	8.39167	6.47667
U	2006	7	jul	2	0	0	23.6661	26.8871	21.1839	80.3333	65.871	24.6909	2.83548
U	2006	8	aug	2	0	0	27.2598	31.4968	23.6355	71.8387	52.9677	10.975	7.29032
U	2006	9	sep	3	0	0	20.5278	24.1933	17.1967	71.6917	52.4	11.5385	5.21667
U	2006	10	oct	3	1	3	18.6457	24.0032	14.471	68.6546	43.1613	3	6.84839
U	2006	11	nov	3	0	1	11.4396	16.14	7.08	58.1556	37.7	1.78889	4.76667
U	2006	12	dec	4	0	0	5.16344	10.229	0.958065	52.9583	34.0323	1.5	6.09677
U	2007	1	jan	4	0	0	4.8086	9.50968	0.93871	45.4892	26.4516	0.375	5.85484
U	2007	2	feb	4	0	0	7.08884	12.2571	2.31786	55.9271	33.4643	4.93	6.42857
U	2007	3	mar	1	0	0	8.75565	13.5742	4.3129	60.3763	42.5484	6.31538	6.04194
U	2007	4	apr	1	0	0	13.5207	18.6633	8.46333	55.8375	34.9	3.05	7.08333
U	2007	5	may	1	0	0	18.8911	23.9742	13.9419	64.7769	42.1935	6.02857	7.60968
U	2007	6	jun	2	0	0	21.661	25.5567	18.1133	76.9819	60.6667	7.86667	5.13333
U	2007	7	jul	2	0	0	23.953	27.029	21.0258	82.8763	68.871	11.3842	3.73226
U	2007	8	aug	2	0	0	27.4683	31.1129	24.171	78.0497	62.2581	10.7125	5.56129
U	2007	9	sep	3	0	0	22.0551	25.1167	19.4567	82.4333	68.1	11.425	3.21667
U	2007	10	oct	3	0	0	16.6379	21.1774	12.8387	74.2527	54.1613	10.0636	5.11613
U	2007	11	nov	3	4	1	9.56889	15.0367	4.71	58.0111	37.9333	2	6.95
U	2007	12	dec	4	0	0	5.3914	9.4129	1.87419	57.9046	41.7742	3.96	5.8129
U	2008	1	jan	4	0	0	2.50645	6.61613	-0.835484	59.7487	42.1935	6.68182	5.43226
U	2008	2	feb	4	0	0	2.23305	7.36552	-2.35172	39.717	24.3448	2	8.12069
U	2008	3	mar	1	0	0	8.52675	13.4	4.01613	62.0712	40.7742	5.32222	6.44516
U	2008	4	apr	1	0	0	13.7436	18.6767	8.97333	62.8431	41.3333	8.68889	7.46333
U	2008	5	may	1	0	0	17.7442	22.5613	13.1	67.7341	47.6129	10.1333	7.13548
U	2008	6	jun	2	0	0	19.7975	23.1233	16.6767	77.9542	64.0667	10.0882	4.19667
U	2008	7	jul	2	0	0	26.8812	30.9097	23.6548	77.8777	61.4194	16.7846	5.90323
U	2008	8	aug	2	0	0	24.7931	28.4258	21.7065	77.9985	62.4516	16.9667	6.12258
U	2008	9	sep	3	0	0	21.8788	25.7333	18.3867	78.1528	60.1667	4.11667	5.04667
U	2008	10	oct	3	7	1	17.3956	22.6355	12.7871	68.997	45.7097	1.88	6.90645
U	2008	11	nov	3	2	0	10.0064	14.9233	6.04667	61.1833	40.8333	2.38571	5.98667
U	2008	12	dec	4	0	0	4.47823	10.0065	-0.254839	52.1413	32.9032	3.5	6.94516
U	2009	1	jan	4	0	0	1.49355	7.13226	-2.96129	49.2548	31.7097	2.45	6.6
U	2009	2	feb	4	0	0	6.73214	11.7	2.36429	62.5321	39.9286	4.05	5.07857
U	2009	3	mar	1	0	0	8.83226	14.0129	3.96774	56.4742	34.7742	4.375	6.29677
U	2009	4	apr	1	0	0	13.8767	20.29	8.35333	58	33.9333	5.71818	8.34667
U	2009	5	may	1	0	0	18.8355	25.029	13.929	63.1806	39.7097	11.5375	8.23226
U	2009	6	jun	2	1	0	22.21	27.33	18.12	69.3367	51.1333	16.3357	6.34
U	2009	7	jul	2	0	0	23.2742	27.1935	20.2323	83.3097	66.9355	21.4619	2.95161
U	2009	8	aug	2	0	0	24.1613	28.1323	21.1032	77.5387	61.2258	2.52941	4.74839
U	2009	9	sep	3	0	0	21.41	25.8767	17.88	75.6667	57.6	4.2	5.04667
U	2009	10	oct	3	0	1	17.0226	23.1839	12.1258	64.2968	39.3871	7.78571	7.92903
U	2009	11	nov	3	0	0	9.62333	14.8533	5.41333	63.41	45	4.03333	5.22667
U	2009	12	dec	4	0	0	3.85806	9.13226	-0.306452	50.3903	32.2903	4.025	6.7871
